# Supplementary material for: DLC-engineered flat gravure surface: enabling sustainable fabrication to replace chrome for printing conductive line electrodes in flexible electronics
Source: Royal Society of Chemistry journal article supplement (doi:10.1039/d4ma00562g), 2024-01-01
Supplement: d4ma00562g1.xlsx [file d4ma00562g1.xlsx]

## Sheet: Resis-Cr-DLC-MetalBlade
					Measurments are in mega ohm																		Measurments are in mega ohm
					Chrome	White PET																	DLC	White PET
						Resistance Measurments are in Kilo ohm						Kilo Ohm Resis		Line Width in Micrometer										Resistance Measurments are in Kilo ohm						Kilo Ohm Resis		Line Width in Micrometer
					20um line Grid	1	2	3	4	5	6	Avg	Sample Std Dev	count	AvgLnWidh	SamStdDevLineWidth							20um line Grid	1	2	3	4	5	6	Avg	Sample Std Dev	count	AvgLnWidh	SamStdDevLineWidth
			Chrome-MetalBlade	Henkel Ink	Grid-20-1000um	NR	NR	NR	NR	NR	NR			25	32.2524	1.03318					DLC-MetalBlade	Henkel Ink	Grid-20-1000um	NR	NR	NR	NR	NR	NR			25	36.2926	1.16129
					Grid-20-500um	NR	NR	NR	NR	NR	NR			25	35.3795	1.36586							Grid-20-500um	NR	NR	NR	NR	NR	NR			25	39.533	1.94556
					Grid-20-200um	NR	NR	NR	NR	NR	NR			25	37.6997	1.76108							Grid-20-200um	NR	NR	NR	NR	NR	NR			25	40.28	2.4532
					Grid-30-1000um	910	743	810	855	710	780	801.333	73.4348	25	46.1797	1.22855							Grid-30-1000um	785	505	795	767	745	530	687.833	133.267	25	50.0813	1.84339
					Grid-30-500um	318	521	325	650	558	563	489.167	136.615	25	47.5198	1.19394							Grid-30-500um	313	350	391	309	289	377	338.167	40.8432	25	52.4966	1.6902
					Grid-30-200um	205	249	137.3	250	195.5	190.7	204.583	42.0428	25	53.742	0.998953							Grid-30-200um	151.5	185.6	155.5	230.7	202.5	218.2	190.667	32.549	25	56.2858	1.87806
				INX Ink	Grid-20-1000um	17750	19620	18780	18280	23600	19240	19545	2095.19	25	46.9334	1.26811						INX Ink	Grid-20-1000um	25230	24650	29550	28970	30660	30500	28260	2651.75	25	51.5207	0.920646
					Grid-20-500um	13750	15230	10950	10040	12090	11030	12181.7	1959.11	25	53.4432	0.594773							Grid-20-500um	18270	19880	25810	24740	27440	22350	23081.7	3553.23	25	57.7133	2.42487
					Grid-20-200um	699	778	754	784	807	804	771	40.1896	25	58.4774	1.0743							Grid-20-200um	950	1060	1090	1050	1040	1180	1061.67	74.6771	25	60.3488	1.10949
					Grid-30-1000um	1660	2050	2034	1775	2084	1941	1924	170.741	25	67.127	1.44076							Grid-30-1000um	1950	2033	2145	2110	2065	2422	2120.83	162.123	25	73.4556	1.49097
					Grid-30-500um	1375	1653	1624	1705	1666	1750	1628.83	131.835	25	71.3064	1.95279							Grid-30-500um	1265	1329	1207	1169	1425	1310	1284.17	91.7571	25	76.029	1.23398
					Grid-30-200um	239.8	249.6	223.5	228.4	255.7	254.2	241.867	13.6105	25	85.1476	0.739998							Grid-30-200um	206.2	226.4	203	198..0	215	224.6	215.04	10.5303	25	90.6885	1.21093
					Chrome	Clear PET																	DLC	Clear PET
						Resistance Measurments are in Kilo ohm						Kilo Ohm Resis		Line Width in Micrometer										Resistance Measurments are in Kilo ohm						Kilo Ohm Resis		Line Width in Micrometer
					20um line Grid	1	2	3	4	5	6	Avg	Sample Std Dev	count	AvgLnWidh	SamStdDevLineWidth							20um line Grid	1	2	3	4	5	6	Avg	Sample Std Dev	count	AvgLnWidh	SamStdDevLineWidth
			Chrome-MetalBlade	Henkel Ink	Grid-20-1000um	NR	NR	NR	NR	NR	NR			25	24.2429	1.97861					DLC-MetalBlade	Henkel Ink	Grid-20-1000um	NR	NR	NR	NR	NR	NR			25	26.7138	1.57644
					Grid-20-500um	NR	NR	NR	NR	NR	NR			25	27.0191	1.18822							Grid-20-500um	NR	NR	NR	NR	NR	NR			25	28.6405	1.20335
					Grid-20-200um	NR	NR	NR	NR	NR	NR			25	33.1307	2.16142							Grid-20-200um	NR	NR	NR	NR	NR	NR			25	34.366	1.38664
					Grid-30-1000um	733	436	411	378	350	360	444.667	144.858	25	36.2983	2.08388							Grid-30-1000um	1362	1760	1994	1580	1450	1350	1582.67	253.408	25	40.708	1.93292
					Grid-30-500um	377	471	350	437	302	460	399.5	67.2926	25	43.5224	1.87178							Grid-30-500um	660	580	651	621	850	713	679.167	94.5588	25	44.8373	1.83652
					Grid-30-200um	102	143.9	113.2	132.2	129.4	135.2	125.983	15.4589	25	50.6948	2.24232							Grid-30-200um	114.5	123.7	130.2	123.4	150.6	150.2	132.1	15.0298	25	53.7886	2.84849
				INX Ink	Grid-20-1000um	10770	7650	10130	12090	11690	10890	10536.7	1576.1	25	36.4594	2.18106						INX Ink	Grid-20-1000um	16190	15090	17120	16280	20500	15160	16723.3	2000.67	25	41.7838	0.524072
					Grid-20-500um	5680	5640	5270	5270	6660	8800	6220	1362.57	25	40.9804	0.588887							Grid-20-500um	7870	8950	9840	8650	9350	10150	9135	829.837	25	44.848	0.623853
					Grid-20-200um	636	701	659	652	692	733	678.833	36.1852	25	44.8759	1.05727							Grid-20-200um	630	664	642	664	716	671	664.5	29.6361	25	51.6915	1.01318
					Grid-30-1000um	1851	1670	1586	1854	1968	1842	1795.17	140.043	25	54.6201	2.72372							Grid-30-1000um	1765	1612	1631	1893	2012	1766	1779.83	153.257	25	62.0875	1.55503
					Grid-30-500um	910	1059	1104	1106	1063	1158	1066.67	84.7341	25	58.0289	0.960784							Grid-30-500um	1052	1077	1052	1095	997	1097	1061.67	37.3184	25	64.5971	0.712134
					Grid-30-200um	208.5	233.5	218.4	202.8	232	227.9	220.517	12.7883	25	73.7592	2.30083							Grid-30-200um	198.8	216.1	208.8	195.8	218.9	218	209.4	10.0676	25	82.8941	1.76629

## Sheet: Resis-Cr-DLC-PlasticBlade
					Measurments are in mega ohm																		Measurments are in mega ohm
					Chrome	White PET																	DLC	White PET
						Resistance Measurments are in Kilo ohm						Kilo Ohm Resis		Line Width in Micrometer										Resistance Measurments are in Kilo ohm						Kilo Ohm Resis		Line Width in Micrometer
					20um line Grid	1	2	3	4	5	6	Avg	Sample Std Dev	count	AvgLnWidh	SamStdDevLineWidth							20um line Grid	1	2	3	4	5	6	Avg	Sample Std Dev	count	AvgLnWidh	SamStdDevLineWidth
			Chrome-PlasticBlade	Henkel Ink	Grid-20-1000um	NR	NR	NR	NR	NR	NR			25	22.1509	0.780959					DLC-PlasticlBlade	Henkel Ink	Grid-20-1000um	NR	NR	NR	NR	NR	NR			25	26.3632	0.986293
					Grid-20-500um	NR	NR	NR	NR	NR	NR			25	26.1347	0.512242							Grid-20-500um	NR	NR	NR	NR	NR	NR			25	33.2001	0.773341
					Grid-20-200um	NR	NR	NR	NR	NR	NR			25	33.66	1.13883							Grid-20-200um	NR	NR	NR	NR	NR	NR			25	39.6611	1.04782
					Grid-30-1000um	370	327	365	343	298	437	356.667	47.3484	25	38.1872	2.40309							Grid-30-1000um	606	692	465	533	607	515	569.667	81.2002	25	41.8886	1.54277
					Grid-30-500um	211.3	220.3	210.2	203.8	219.5	215.8	213.483	6.28249	25	39.4361	1.07342							Grid-30-500um	303	425	305	307	315	425	346.667	60.8134	25	45.9192	1.06806
					Grid-30-200um	102.3	125.6	120.5	135.2	108.2	123.5	119.217	12.0312	25	49.4983	0.645824							Grid-30-200um	255.9	224.9	243.7	254.6	177.4	223.5	230	29.3213	25	55.3331	0.888456
				INX Ink	Grid-20-1000um	3600	3500	3280	3100	3870	3640	3498.33	273.819	25	39.582	0.686886						INX Ink	Grid-20-1000um	2930	3350	4060	2610	2850	3270	3178.33	511.407	25	39.3492	0.765902
					Grid-20-500um	2390	2690	2230	1950	2660	2340	2376.67	276.96	25	41.9676	0.341538							Grid-20-500um	2050	2350	2320	2520	2860	1960	2343.33	326.108	25	44.9703	0.266398
					Grid-20-200um	1220	1260	1030	980	1330	1090	1151.67	138.768	25	48.6192	0.27387							Grid-20-200um	1810	1730	2070	1840	2440	1720	1935	277.903	25	53.8699	1.91935
					Grid-30-1000um	830	880	925	870	700	707	818.667	94.2161	25	58.6837	0.983681							Grid-30-1000um	920	1020	960	900	990	1030	970	52.915	25	59.345	1.2711
					Grid-30-500um	606	745	709	595	711	725	681.833	64.3938	25	59.8952	0.729336							Grid-30-500um	670	740	610	570	730	680	666.667	66.5332	25	63.5308	0.614876
					Grid-30-200um	185	232.2	208.2	235.4	242.5	234	222.883	21.9208	25	72.4135	0.716539							Grid-30-200um	213	196	206	188	211	219	205.5	11.5369	25	80.0642	0.558032
					Chrome	Clear PET																	DLC	Clear PET
						Resistance Measurments are in Kilo ohm						Kilo Ohm Resis		Line Width in Micrometer										Resistance Measurments are in Kilo ohm						Kilo Ohm Resis		Line Width in Micrometer
					20um line Grid	1	2	3	4	5	6	Avg	Sample Std Dev	count	AvgLnWidh	SamStdDevLineWidth							20um line Grid	1	2	3	4	5	6	Avg	Sample Std Dev	count	AvgLnWidh	SamStdDevLineWidth
			Chrome-PlasticBlade	Henkel Ink	Grid-20-1000um	NR	NR	NR	NR	NR	NR			25	20.3697	1.03688					DLC-PlasticBlade	Henkel Ink	Grid-20-1000um	NR	NR	NR	NR	NR	NR			25	20.5018	1.11808
					Grid-20-500um	NR	NR	NR	NR	NR	NR			25	22.6453	0.972355							Grid-20-500um	NR	NR	NR	NR	NR	NR			25	24.6044	1.09052
					Grid-20-200um	NR	NR	NR	NR	NR	NR			25	29.7515	1.83202							Grid-20-200um	NR	NR	NR	NR	NR	NR			25	32.4478	0.878959
					Grid-30-1000um	318	407	360	357	394	364	366.667	31.2645	25	34.3265	1.20607							Grid-30-1000um	413	592	672	670	483	467	549.5	110.629	25	35.6233	2.09565
					Grid-30-500um	199.2	187.9	197.7	179.9	205.6	203.6	195.65	9.87051	25	37.4136	0.717125							Grid-30-500um	209	370	285	371	307	222	294	69.8054	25	39.1699	1.23173
					Grid-30-200um	135.5	146.5	106.4	113.5	117.1	118.1	122.85	15.0532	25	44.7642	1.17557							Grid-30-200um	183.5	152.4	110.6	156.4	126.5	168.4	149.633	26.875	25	45.9824	1.43269
				INX Ink	Grid-20-1000um	8200	7710	6950	5960	7140	6080	7006.67	882.489	25	27.5728	2.13015						INX Ink	Grid-20-1000um	3836	3850	2794	2659	3010	3230	3229.83	513.064	25	31.6698	0.614898
					Grid-20-500um	4360	3140	4260	4110	3620	4130	3936.67	466.076	25	34.912	0.448205							Grid-20-500um	2318	2476	2027	2057	2064	2215	2192.83	178.264	25	38.0749	0.551001
					Grid-20-200um	2134	2409	1892	1581	1979	2408	2067.17	320.093	25	42.6484	2.29914							Grid-20-200um	1259	1555	1183	959	1010	1440	1234.33	234.309	25	50.7278	1.61502
					Grid-30-1000um	1811	2000	2055	2049	2065	2391	2061.83	187.25	25	47.917	1.31587							Grid-30-1000um	1048	1116	1071	938	1164	1018	1059.17	78.5631	25	48.001	1.17123
					Grid-30-500um	1119	1198	1443	1412	1459	1249	1313.33	143.508	25	51.8168	0.988505							Grid-30-500um	696	714	607	637	712	750	686	53.4752	25	56.1348	0.787198
					Grid-30-200um	211.3	229.6	236.5	255.1	251.5	276.5	243.417	22.6564	25	67.7614	0.835354							Grid-30-200um	190	190.6	199.7	195	199.1	205.3	196.617	5.89353	25	74.5726	0.726743

## Sheet: Chrome-Grid20
	Trial 1 Experiment			Trial 2 Experiment			Trial 3 Experiment			Trial 4 Experiment			Trial 5 Experiment			Trial 6 Experiment			Trial 7 Experiment			Trial 8 Experiment
	Chrome-MBlade-Black60-WhPET-Grid20			Chrome-MBlade-Black60-ClrPET-Grid20			Chrome-MBlade-ECI7007-WhPET-Grid20			Chrome-MBlade-ECI7007-ClrPET-Grid20			ChromePBlade-Black60-WhPET-Grid20			ChromePBlade-Black60-ClrPET-Grid20			ChromePBlade-ECI7007-WhPET-Grid20			ChromePBlade-ECI7007-ClrPET-Grid20
	Design	Line Width (µm)		Design	Line Width (µm)		Design	Line Width (µm)		Design	Line Width (µm)		Design	Line Width (µm)		Design	Line Width (µm)		Design	Line Width (µm)		Design	Line Width (µm)
	Grid-20-1000um	45.785		Grid-20-1000um	37.373		Grid-20-1000um	31.067		Grid-20-1000um	25.325		Grid-20-1000um	39.182		Grid-20-1000um	27.249		Grid-20-1000um	22.685		Grid-20-1000um	19.201
	Grid-20-1000um	47.644		Grid-20-1000um	36.588		Grid-20-1000um	32.449		Grid-20-1000um	25.639		Grid-20-1000um	39.057		Grid-20-1000um	27.085		Grid-20-1000um	22.267		Grid-20-1000um	19.786
	Grid-20-1000um	46.821		Grid-20-1000um	36.96		Grid-20-1000um	32.704		Grid-20-1000um	26.5		Grid-20-1000um	39.385		Grid-20-1000um	27.368		Grid-20-1000um	22.695		Grid-20-1000um	20.973
	Grid-20-1000um	46.919		Grid-20-1000um	36.967		Grid-20-1000um	31.511		Grid-20-1000um	24.386		Grid-20-1000um	40.292		Grid-20-1000um	25.887		Grid-20-1000um	22.709		Grid-20-1000um	20.405
	Grid-20-1000um	46.462		Grid-20-1000um	36.214		Grid-20-1000um	32.545		Grid-20-1000um	25.664		Grid-20-1000um	40.107		Grid-20-1000um	25.931		Grid-20-1000um	20.973		Grid-20-1000um	21.69
	Grid-20-1000um	45.794		Grid-20-1000um	36.928		Grid-20-1000um	30.05		Grid-20-1000um	26.002		Grid-20-1000um	38.908		Grid-20-1000um	26.316		Grid-20-1000um	20.811		Grid-20-1000um	21.179
	Grid-20-1000um	45.827		Grid-20-1000um	35.743		Grid-20-1000um	33.028		Grid-20-1000um	26.557		Grid-20-1000um	39.404		Grid-20-1000um	25.991		Grid-20-1000um	21.956		Grid-20-1000um	19.978
	Grid-20-1000um	46.176		Grid-20-1000um	37.971		Grid-20-1000um	33.806		Grid-20-1000um	26.645		Grid-20-1000um	40.412		Grid-20-1000um	24.903		Grid-20-1000um	24.018		Grid-20-1000um	19.616
	Grid-20-1000um	45.723		Grid-20-1000um	35.897		Grid-20-1000um	31.441		Grid-20-1000um	25.098		Grid-20-1000um	40.378		Grid-20-1000um	24.271		Grid-20-1000um	22.375		Grid-20-1000um	19.023
	Grid-20-1000um	45.42		Grid-20-1000um	36.289		Grid-20-1000um	32.568		Grid-20-1000um	24.938		Grid-20-1000um	39.833		Grid-20-1000um	24.856		Grid-20-1000um	22.35		Grid-20-1000um	18.449
	Grid-20-1000um	48.324		Grid-20-1000um	36.103		Grid-20-1000um	31.579		Grid-20-1000um	26.083		Grid-20-1000um	39.851		Grid-20-1000um	25.234		Grid-20-1000um	21.156		Grid-20-1000um	18.67
	Grid-20-1000um	47.701		Grid-20-1000um	36.033		Grid-20-1000um	30.005		Grid-20-1000um	26.083		Grid-20-1000um	40.066		Grid-20-1000um	25.116		Grid-20-1000um	22.146		Grid-20-1000um	19.26
	Grid-20-1000um	46.695		Grid-20-1000um	35.464		Grid-20-1000um	32.038		Grid-20-1000um	23.658		Grid-20-1000um	39.892		Grid-20-1000um	25.726		Grid-20-1000um	22.722		Grid-20-1000um	19.153
	Grid-20-1000um	48.212		Grid-20-1000um	36.005		Grid-20-1000um	32.824		Grid-20-1000um	22.543		Grid-20-1000um	37.833		Grid-20-1000um	26.528		Grid-20-1000um	22.95		Grid-20-1000um	20.486
	Grid-20-1000um	48.162		Grid-20-1000um	34.5		Grid-20-1000um	32.683		Grid-20-1000um	22.665		Grid-20-1000um	38.887		Grid-20-1000um	29.912		Grid-20-1000um	22.526		Grid-20-1000um	19.527
	Grid-20-1000um	49.125		Grid-20-1000um	35.97		Grid-20-1000um	32.533		Grid-20-1000um	24.528		Grid-20-1000um	39.787		Grid-20-1000um	30.173		Grid-20-1000um	20.91		Grid-20-1000um	20.207
	Grid-20-1000um	44.687		Grid-20-1000um	35.087		Grid-20-1000um	31.968		Grid-20-1000um	24.963		Grid-20-1000um	39.409		Grid-20-1000um	30.081		Grid-20-1000um	21.772		Grid-20-1000um	21.477
	Grid-20-1000um	46.125		Grid-20-1000um	36.048		Grid-20-1000um	31.909		Grid-20-1000um	24.54		Grid-20-1000um	38.929		Grid-20-1000um	30.347		Grid-20-1000um	21.951		Grid-20-1000um	21.52
	Grid-20-1000um	45.93		Grid-20-1000um	38.974		Grid-20-1000um	33.565		Grid-20-1000um	25.404		Grid-20-1000um	38.667		Grid-20-1000um	29.498		Grid-20-1000um	22.413		Grid-20-1000um	21.598
	Grid-20-1000um	45.41		Grid-20-1000um	37.523		Grid-20-1000um	32.146		Grid-20-1000um	20.704		Grid-20-1000um	38.658		Grid-20-1000um	28.506		Grid-20-1000um	21.854		Grid-20-1000um	21.031
	Grid-20-1000um	47.909		Grid-20-1000um	38.633		Grid-20-1000um	33.187		Grid-20-1000um	22.421		Grid-20-1000um	40.083		Grid-20-1000um	27.765		Grid-20-1000um	22.429		Grid-20-1000um	21.157
	Grid-20-1000um	46.943		Grid-20-1000um	37.998		Grid-20-1000um	33.894		Grid-20-1000um	23.134		Grid-20-1000um	39.876		Grid-20-1000um	30.019		Grid-20-1000um	22.449		Grid-20-1000um	20.465
	Grid-20-1000um	48.703		Grid-20-1000um	37.694		Grid-20-1000um	33.101		Grid-20-1000um	22.111		Grid-20-1000um	39.658		Grid-20-1000um	30.44		Grid-20-1000um	20.9		Grid-20-1000um	21.298
	Grid-20-1000um	47.517		Grid-20-1000um	38.945		Grid-20-1000um	30.846		Grid-20-1000um	20.454		Grid-20-1000um	40.641		Grid-20-1000um	29.863		Grid-20-1000um	21.628		Grid-20-1000um	21.547
	Grid-20-1000um	49.322		Grid-20-1000um	39.579		Grid-20-1000um	32.862		Grid-20-1000um	20.028		Grid-20-1000um	40.356		Grid-20-1000um	30.255		Grid-20-1000um	23.128		Grid-20-1000um	21.547
	Grid-20-500um	53.474		Grid-20-500um	41.127		Grid-20-500um	35.947		Grid-20-500um	28.283		Grid-20-500um	41.792		Grid-20-500um	35.673		Grid-20-500um	26.555		Grid-20-500um	23.579
	Grid-20-500um	53.249		Grid-20-500um	41.037		Grid-20-500um	33.762		Grid-20-500um	28.47		Grid-20-500um	42.594		Grid-20-500um	35.221		Grid-20-500um	26.806		Grid-20-500um	24.241
	Grid-20-500um	54.038		Grid-20-500um	41.17		Grid-20-500um	33.707		Grid-20-500um	28.877		Grid-20-500um	41.573		Grid-20-500um	35.128		Grid-20-500um	26.399		Grid-20-500um	23.237
	Grid-20-500um	54.309		Grid-20-500um	40.046		Grid-20-500um	36.021		Grid-20-500um	28.475		Grid-20-500um	41.751		Grid-20-500um	35.036		Grid-20-500um	25.641		Grid-20-500um	23.884
	Grid-20-500um	53.328		Grid-20-500um	41.648		Grid-20-500um	36.367		Grid-20-500um	28.345		Grid-20-500um	42.085		Grid-20-500um	34.975		Grid-20-500um	26.086		Grid-20-500um	22.851
	Grid-20-500um	54.424		Grid-20-500um	41.533		Grid-20-500um	36.192		Grid-20-500um	28.175		Grid-20-500um	42.471		Grid-20-500um	35.263		Grid-20-500um	26.223		Grid-20-500um	23.94
	Grid-20-500um	52.825		Grid-20-500um	40.933		Grid-20-500um	36.598		Grid-20-500um	26.988		Grid-20-500um	41.749		Grid-20-500um	34.395		Grid-20-500um	25.916		Grid-20-500um	22.934
	Grid-20-500um	53.093		Grid-20-500um	41.391		Grid-20-500um	37.132		Grid-20-500um	26.241		Grid-20-500um	42.1		Grid-20-500um	35.463		Grid-20-500um	26.266		Grid-20-500um	21.777
	Grid-20-500um	53.356		Grid-20-500um	40.296		Grid-20-500um	35.398		Grid-20-500um	26.213		Grid-20-500um	42.334		Grid-20-500um	34.3		Grid-20-500um	26.321		Grid-20-500um	21.945
	Grid-20-500um	54.152		Grid-20-500um	40.21		Grid-20-500um	36.696		Grid-20-500um	25.665		Grid-20-500um	41.968		Grid-20-500um	34.751		Grid-20-500um	25.865		Grid-20-500um	22.715
	Grid-20-500um	52.438		Grid-20-500um	40.693		Grid-20-500um	32.384		Grid-20-500um	29.084		Grid-20-500um	42.5		Grid-20-500um	33.975		Grid-20-500um	26.128		Grid-20-500um	21.449
	Grid-20-500um	53.773		Grid-20-500um	41.578		Grid-20-500um	34.986		Grid-20-500um	26.659		Grid-20-500um	41.87		Grid-20-500um	34.62		Grid-20-500um	26.766		Grid-20-500um	21.695
	Grid-20-500um	53.192		Grid-20-500um	41.644		Grid-20-500um	35.764		Grid-20-500um	27.506		Grid-20-500um	41.546		Grid-20-500um	34.807		Grid-20-500um	26.114		Grid-20-500um	22.665
	Grid-20-500um	54.342		Grid-20-500um	40.521		Grid-20-500um	34.872		Grid-20-500um	27.584		Grid-20-500um	41.781		Grid-20-500um	34.405		Grid-20-500um	27.653		Grid-20-500um	22.099
	Grid-20-500um	53.255		Grid-20-500um	40.678		Grid-20-500um	37.092		Grid-20-500um	25.811		Grid-20-500um	41.68		Grid-20-500um	34.097		Grid-20-500um	26.07		Grid-20-500um	21.636
	Grid-20-500um	53.658		Grid-20-500um	40.102		Grid-20-500um	36.723		Grid-20-500um	27.65		Grid-20-500um	41.583		Grid-20-500um	34.994		Grid-20-500um	26.355		Grid-20-500um	21.882
	Grid-20-500um	52.839		Grid-20-500um	40.901		Grid-20-500um	35.008		Grid-20-500um	27.578		Grid-20-500um	41.553		Grid-20-500um	34.996		Grid-20-500um	25.701		Grid-20-500um	20.715
	Grid-20-500um	53.121		Grid-20-500um	41.403		Grid-20-500um	37.051		Grid-20-500um	26.705		Grid-20-500um	41.465		Grid-20-500um	34.784		Grid-20-500um	26.262		Grid-20-500um	22.184
	Grid-20-500um	54.062		Grid-20-500um	40.54		Grid-20-500um	36.57		Grid-20-500um	26.579		Grid-20-500um	41.938		Grid-20-500um	34.986		Grid-20-500um	24.985		Grid-20-500um	21.868
	Grid-20-500um	52.928		Grid-20-500um	40.338		Grid-20-500um	33.235		Grid-20-500um	26.239		Grid-20-500um	42.438		Grid-20-500um	35.188		Grid-20-500um	25.588		Grid-20-500um	22.272
	Grid-20-500um	53.714		Grid-20-500um	40.993		Grid-20-500um	34.289		Grid-20-500um	26.176		Grid-20-500um	41.819		Grid-20-500um	35.554		Grid-20-500um	25.544		Grid-20-500um	22.06
	Grid-20-500um	52.829		Grid-20-500um	42.004		Grid-20-500um	33.314		Grid-20-500um	26.081		Grid-20-500um	42.227		Grid-20-500um	34.812		Grid-20-500um	26.236		Grid-20-500um	22.897
	Grid-20-500um	52.838		Grid-20-500um	40.506		Grid-20-500um	34.025		Grid-20-500um	25.274		Grid-20-500um	42.127		Grid-20-500um	35.405		Grid-20-500um	25.653		Grid-20-500um	24.397
	Grid-20-500um	52.6		Grid-20-500um	42.155		Grid-20-500um	35.764		Grid-20-500um	25.952		Grid-20-500um	41.84		Grid-20-500um	34.597		Grid-20-500um	26.112		Grid-20-500um	23.379
	Grid-20-500um	54.244		Grid-20-500um	41.064		Grid-20-500um	35.591		Grid-20-500um	24.867		Grid-20-500um	42.407		Grid-20-500um	35.375		Grid-20-500um	26.123		Grid-20-500um	23.832
	Grid-20-200um	59.208		Grid-20-200um	44.603		Grid-20-200um	36.824		Grid-20-200um	33.896		Grid-20-200um	48.933		Grid-20-200um	45.431		Grid-20-200um	34.975		Grid-20-200um	30.426
	Grid-20-200um	59.283		Grid-20-200um	45.007		Grid-20-200um	38.281		Grid-20-200um	35.175		Grid-20-200um	48.755		Grid-20-200um	42.255		Grid-20-200um	35.396		Grid-20-200um	29.834
	Grid-20-200um	59.758		Grid-20-200um	45.815		Grid-20-200um	38.809		Grid-20-200um	34.053		Grid-20-200um	48.735		Grid-20-200um	43.292		Grid-20-200um	35.735		Grid-20-200um	29.075
	Grid-20-200um	55.849		Grid-20-200um	45.296		Grid-20-200um	35.492		Grid-20-200um	34.006		Grid-20-200um	48.632		Grid-20-200um	45.525		Grid-20-200um	35.596		Grid-20-200um	29.384
	Grid-20-200um	59.228		Grid-20-200um	45.751		Grid-20-200um	36.953		Grid-20-200um	33.342		Grid-20-200um	48.842		Grid-20-200um	42.062		Grid-20-200um	32.94		Grid-20-200um	30.389
	Grid-20-200um	59.205		Grid-20-200um	46.05		Grid-20-200um	38.8		Grid-20-200um	33.947		Grid-20-200um	48.743		Grid-20-200um	45.152		Grid-20-200um	33.509		Grid-20-200um	31.212
	Grid-20-200um	58.793		Grid-20-200um	45.335		Grid-20-200um	33.043		Grid-20-200um	32.703		Grid-20-200um	48.497		Grid-20-200um	44.38		Grid-20-200um	33.444		Grid-20-200um	32.91
	Grid-20-200um	59.063		Grid-20-200um	44.379		Grid-20-200um	38.706		Grid-20-200um	29.314		Grid-20-200um	48.676		Grid-20-200um	45.055		Grid-20-200um	32.234		Grid-20-200um	31.989
	Grid-20-200um	58.582		Grid-20-200um	44.638		Grid-20-200um	36.958		Grid-20-200um	31.128		Grid-20-200um	48.666		Grid-20-200um	39.317		Grid-20-200um	34.157		Grid-20-200um	31.774
	Grid-20-200um	59.673		Grid-20-200um	45.467		Grid-20-200um	37.586		Grid-20-200um	33.353		Grid-20-200um	48.527		Grid-20-200um	40.122		Grid-20-200um	32.317		Grid-20-200um	30.69
	Grid-20-200um	59.243		Grid-20-200um	45.743		Grid-20-200um	36.001		Grid-20-200um	31.607		Grid-20-200um	48.533		Grid-20-200um	43.346		Grid-20-200um	33.872		Grid-20-200um	31.541
	Grid-20-200um	59.308		Grid-20-200um	45.043		Grid-20-200um	36.001		Grid-20-200um	30.827		Grid-20-200um	48.474		Grid-20-200um	39.47		Grid-20-200um	32.904		Grid-20-200um	30.35
	Grid-20-200um	58.717		Grid-20-200um	45.741		Grid-20-200um	36.946		Grid-20-200um	32.77		Grid-20-200um	48.504		Grid-20-200um	42.707		Grid-20-200um	34.836		Grid-20-200um	30.81
	Grid-20-200um	59.38		Grid-20-200um	46.398		Grid-20-200um	38.88		Grid-20-200um	29.607		Grid-20-200um	48.422		Grid-20-200um	39.926		Grid-20-200um	34.463		Grid-20-200um	30.165
	Grid-20-200um	57.768		Grid-20-200um	44.737		Grid-20-200um	35.506		Grid-20-200um	38.49		Grid-20-200um	48.912		Grid-20-200um	39.561		Grid-20-200um	32.522		Grid-20-200um	31.412
	Grid-20-200um	58.132		Grid-20-200um	45.421		Grid-20-200um	39.81		Grid-20-200um	35.599		Grid-20-200um	48.952		Grid-20-200um	43.585		Grid-20-200um	33.199		Grid-20-200um	30.144
	Grid-20-200um	58.377		Grid-20-200um	44.815		Grid-20-200um	39.379		Grid-20-200um	30.381		Grid-20-200um	48.384		Grid-20-200um	40.602		Grid-20-200um	32.92		Grid-20-200um	30.675
	Grid-20-200um	58.409		Grid-20-200um	45.006		Grid-20-200um	36.728		Grid-20-200um	30.128		Grid-20-200um	48.237		Grid-20-200um	45.081		Grid-20-200um	33.415		Grid-20-200um	30.283
	Grid-20-200um	58.007		Grid-20-200um	44.903		Grid-20-200um	36.292		Grid-20-200um	32.353		Grid-20-200um	47.884		Grid-20-200um	39.732		Grid-20-200um	33.559		Grid-20-200um	28.311
	Grid-20-200um	59.728		Grid-20-200um	44.477		Grid-20-200um	35.552		Grid-20-200um	34.662		Grid-20-200um	48.172		Grid-20-200um	45.689		Grid-20-200um	32.741		Grid-20-200um	25.658
	Grid-20-200um	58.502		Grid-20-200um	45.679		Grid-20-200um	39.179		Grid-20-200um	33.494		Grid-20-200um	48.896		Grid-20-200um	39.955		Grid-20-200um	32.872		Grid-20-200um	27.309
	Grid-20-200um	56.139		Grid-20-200um	44.799		Grid-20-200um	38.959		Grid-20-200um	33.694		Grid-20-200um	48.81		Grid-20-200um	41.459		Grid-20-200um	33.18		Grid-20-200um	27.489
	Grid-20-200um	57.123		Grid-20-200um	44.781		Grid-20-200um	39.746		Grid-20-200um	35.748		Grid-20-200um	48.972		Grid-20-200um	45.155		Grid-20-200um	35.719		Grid-20-200um	27.778
	Grid-20-200um	57.165		Grid-20-200um	45.417		Grid-20-200um	38.629		Grid-20-200um	35.201		Grid-20-200um	48.421		Grid-20-200um	45.101		Grid-20-200um	32.144		Grid-20-200um	26.843
	Grid-20-200um	57.296		Grid-20-200um	45.337		Grid-20-200um	40.335		Grid-20-200um	32.789		Grid-20-200um	48.902		Grid-20-200um	42.25		Grid-20-200um	32.851		Grid-20-200um	27.336

## Sheet: AvgChrome-Grid20
	Chrome-MBlade-Black60-WhPET-Grid20			Chrome-MBlade-Black60-ClrPET-Grid20			Chrome-MBlade-ECI7007-WhPET-Grid20			Chrome-MBlade-ECI7007-ClrPET-Grid20			ChromePBlade-Black60-WhPET-Grid20			ChromePBlade-Black60-ClrPET-Grid20			ChromePBlade-ECI7007-WhPET-Grid20			ChromePBlade-ECI7007-ClrPET-Grid20
	Design	White PET Line Width (µm)		Design	ClrPET Line Width (µm)		Design	White PET Line Width (µm)		Design	ClrPET Line Width (µm)		Design	White PET Line Width (µm)		Design	ClrPET Line Width (µm)		Design	White PET Line Width (µm)		Design	ClrPET Line Width (µm)
	Chrome-MBlade-Black60 - Grid-20-1000um	46.9334		Chrome-MBlade-Black60 - Grid-20-1000um	36.8594		Chrome-MBlade-ECI7007 - Grid-20-1000um	32.2524		Chrome-MBlade-ECI7007 - Grid-20-1000um	24.2429		ChromePBlade-Black60 - Grid-20-1000um	39.582		ChromePBlade-Black60 - Grid-20-1000um	27.5728		ChromePBlade-ECI7007-Grid-20-1000um	22.1509		ChromePBlade-ECI7007-Grid-20-1000um	20.3697
	Chrome-MBlade-Black60 - Grid-20-500um	53.4432		Chrome-MBlade-Black60 - Grid-20-500um	40.9804		Chrome-MBlade-ECI7007 - Grid-20-500um	35.3795		Chrome-MBlade-ECI7007 - Grid-20-500um	27.0191		ChromePBlade-Black60 - Grid-20-500um	41.9676		ChromePBlade-Black60 - Grid-20-500um	34.912		ChromePBlade-ECI7007-Grid-20-500um	26.1347		ChromePBlade-ECI7007-Grid-20-500um	22.6453
	Chrome-MBlade-Black60 - Grid-20-200um	58.4774		Chrome-MBlade-Black60 - Grid-20-200um	45.2255		Chrome-MBlade-ECI7007 - Grid-20-200um	37.5758		Chrome-MBlade-ECI7007 - Grid-20-200um	33.1307		ChromePBlade-Black60 - Grid-20-200um	48.6192		ChromePBlade-Black60 - Grid-20-200um	42.6484		ChromePBlade-ECI7007-Grid-20-200um	33.66		ChromePBlade-ECI7007-Grid-20-200um	29.7515

## Sheet: Chrome-Grid30
	Trial 1 Experiment			Trial 2 Experiment			Trial 3 Experiment			Trial 4 Experiment			Trial 5 Experiment			Trial 6 Experiment			Trial 7 Experiment			Trial 8 Experiment
	Chrome-MBlade-Black60-WhPET-Grid30			Chrome-MBlade-Black60-ClrPET-Grid30			Chrome-MBlade-ECI7007-WhPET-Grid30			Chrome-MBlade-ECI7007-ClrPET-Grid30			Chrome-PBlade-Black60-WhPET-Grid30			Chrome-PBlade-Black60-ClrPET-Grid30			Chrome-PBlade-ECI7007-WhPET-Grid30			Chrome-PBlade-ECI7007-ClrPET-Grid30
	Design	Line Width (µm)		Design	Line Width (µm)		Design	Line Width (µm)		Design	Line Width (µm)		Design	Line Width (µm)		Design	Line Width (µm)		Design	Line Width (µm)		Design	Line Width (µm)
	Grid-30-1000um	65.144		Grid-30-1000um	57.09		Grid-30-1000um	45.707		Grid-30-1000um	36.649		Grid-30-1000um	58.059		Grid-30-1000um	47.546		Grid-30-1000um	35.269		Grid-30-1000um	35.264
	Grid-30-1000um	65.335		Grid-30-1000um	57.498		Grid-30-1000um	46.734		Grid-30-1000um	36.457		Grid-30-1000um	59.119		Grid-30-1000um	47.112		Grid-30-1000um	36.327		Grid-30-1000um	35.123
	Grid-30-1000um	65.271		Grid-30-1000um	56.337		Grid-30-1000um	47.972		Grid-30-1000um	36.376		Grid-30-1000um	58.404		Grid-30-1000um	46.221		Grid-30-1000um	37.143		Grid-30-1000um	35.399
	Grid-30-1000um	67.148		Grid-30-1000um	56.708		Grid-30-1000um	47.725		Grid-30-1000um	37.646		Grid-30-1000um	59.009		Grid-30-1000um	46.116		Grid-30-1000um	37.671		Grid-30-1000um	34.319
	Grid-30-1000um	65.324		Grid-30-1000um	55.807		Grid-30-1000um	45.548		Grid-30-1000um	39.026		Grid-30-1000um	60.087		Grid-30-1000um	48.246		Grid-30-1000um	39.203		Grid-30-1000um	34.166
	Grid-30-1000um	65.347		Grid-30-1000um	55.757		Grid-30-1000um	47.753		Grid-30-1000um	39.243		Grid-30-1000um	60.087		Grid-30-1000um	48.918		Grid-30-1000um	38.039		Grid-30-1000um	33.903
	Grid-30-1000um	65.178		Grid-30-1000um	55.111		Grid-30-1000um	46.725		Grid-30-1000um	34.255		Grid-30-1000um	59.698		Grid-30-1000um	48.489		Grid-30-1000um	36.38		Grid-30-1000um	34.923
	Grid-30-1000um	65.737		Grid-30-1000um	56.093		Grid-30-1000um	46.929		Grid-30-1000um	35.285		Grid-30-1000um	57.531		Grid-30-1000um	48.929		Grid-30-1000um	34.064		Grid-30-1000um	33.846
	Grid-30-1000um	67.067		Grid-30-1000um	56.576		Grid-30-1000um	45.214		Grid-30-1000um	36.306		Grid-30-1000um	57.966		Grid-30-1000um	48.173		Grid-30-1000um	34.012		Grid-30-1000um	34.938
	Grid-30-1000um	67.947		Grid-30-1000um	57.16		Grid-30-1000um	46.682		Grid-30-1000um	36.686		Grid-30-1000um	59.099		Grid-30-1000um	48.946		Grid-30-1000um	34.141		Grid-30-1000um	34.985
	Grid-30-1000um	68.834		Grid-30-1000um	58.058		Grid-30-1000um	46.151		Grid-30-1000um	33.674		Grid-30-1000um	57.657		Grid-30-1000um	48.969		Grid-30-1000um	34.882		Grid-30-1000um	35.232
	Grid-30-1000um	68.171		Grid-30-1000um	56.421		Grid-30-1000um	45.01		Grid-30-1000um	35.988		Grid-30-1000um	57.584		Grid-30-1000um	46.779		Grid-30-1000um	36.497		Grid-30-1000um	35.894
	Grid-30-1000um	65.266		Grid-30-1000um	55.149		Grid-30-1000um	45.188		Grid-30-1000um	36.336		Grid-30-1000um	59.259		Grid-30-1000um	44.266		Grid-30-1000um	38.229		Grid-30-1000um	32.962
	Grid-30-1000um	67.719		Grid-30-1000um	55.841		Grid-30-1000um	44.983		Grid-30-1000um	36.896		Grid-30-1000um	58.814		Grid-30-1000um	49.753		Grid-30-1000um	41.345		Grid-30-1000um	32.261
	Grid-30-1000um	67.719		Grid-30-1000um	53.932		Grid-30-1000um	44.282		Grid-30-1000um	35.641		Grid-30-1000um	59.893		Grid-30-1000um	49.317		Grid-30-1000um	41.016		Grid-30-1000um	35.57
	Grid-30-1000um	66.627		Grid-30-1000um	55.091		Grid-30-1000um	44.711		Grid-30-1000um	34.09		Grid-30-1000um	58.682		Grid-30-1000um	48.709		Grid-30-1000um	38.947		Grid-30-1000um	34.311
	Grid-30-1000um	68.251		Grid-30-1000um	55.875		Grid-30-1000um	46.095		Grid-30-1000um	33.074		Grid-30-1000um	59.39		Grid-30-1000um	49.537		Grid-30-1000um	40.246		Grid-30-1000um	33.992
	Grid-30-1000um	68.409		Grid-30-1000um	53.753		Grid-30-1000um	46.773		Grid-30-1000um	33.068		Grid-30-1000um	57.847		Grid-30-1000um	48.253		Grid-30-1000um	40.411		Grid-30-1000um	33.491
	Grid-30-1000um	69.103		Grid-30-1000um	52.978		Grid-30-1000um	43.186		Grid-30-1000um	34.181		Grid-30-1000um	58.197		Grid-30-1000um	46.233		Grid-30-1000um	40.797		Grid-30-1000um	33.545
	Grid-30-1000um	68.617		Grid-30-1000um	51.421		Grid-30-1000um	47.762		Grid-30-1000um	34.687		Grid-30-1000um	57.691		Grid-30-1000um	47.659		Grid-30-1000um	40.842		Grid-30-1000um	33.643
	Grid-30-1000um	69.743		Grid-30-1000um	47.475		Grid-30-1000um	46.708		Grid-30-1000um	39.935		Grid-30-1000um	57.287		Grid-30-1000um	47.606		Grid-30-1000um	40.313		Grid-30-1000um	31.633
	Grid-30-1000um	68.522		Grid-30-1000um	48.187		Grid-30-1000um	46.724		Grid-30-1000um	36.455		Grid-30-1000um	56.731		Grid-30-1000um	46.435		Grid-30-1000um	40.465		Grid-30-1000um	31.962
	Grid-30-1000um	67.483		Grid-30-1000um	51.663		Grid-30-1000um	45.414		Grid-30-1000um	35.98		Grid-30-1000um	59.967		Grid-30-1000um	48.343		Grid-30-1000um	39.339		Grid-30-1000um	35.523
	Grid-30-1000um	67.243		Grid-30-1000um	52.549		Grid-30-1000um	46.858		Grid-30-1000um	38.56		Grid-30-1000um	59.216		Grid-30-1000um	48.484		Grid-30-1000um	39.601		Grid-30-1000um	35.429
	Grid-30-1000um	66.969		Grid-30-1000um	52.973		Grid-30-1000um	47.658		Grid-30-1000um	40.963		Grid-30-1000um	59.818		Grid-30-1000um	48.886		Grid-30-1000um	39.502		Grid-30-1000um	35.848
	Grid-30-500um	71.74		Grid-30-500um	57.79		Grid-30-500um	48.799		Grid-30-500um	43.862		Grid-30-500um	60.621		Grid-30-500um	50.224		Grid-30-500um	37.906		Grid-30-500um	37.88
	Grid-30-500um	71.161		Grid-30-500um	58.329		Grid-30-500um	47.382		Grid-30-500um	44.033		Grid-30-500um	60.157		Grid-30-500um	51.042		Grid-30-500um	38.559		Grid-30-500um	36.476
	Grid-30-500um	72.431		Grid-30-500um	58.496		Grid-30-500um	48.261		Grid-30-500um	44.65		Grid-30-500um	59.976		Grid-30-500um	50.134		Grid-30-500um	39.574		Grid-30-500um	36.009
	Grid-30-500um	73.42		Grid-30-500um	58.697		Grid-30-500um	48.571		Grid-30-500um	44.225		Grid-30-500um	59.998		Grid-30-500um	49.39		Grid-30-500um	41.164		Grid-30-500um	38.135
	Grid-30-500um	71.544		Grid-30-500um	58.8		Grid-30-500um	47.062		Grid-30-500um	44.396		Grid-30-500um	59.771		Grid-30-500um	52.769		Grid-30-500um	40.991		Grid-30-500um	36.751
	Grid-30-500um	70.65		Grid-30-500um	58.55		Grid-30-500um	47.838		Grid-30-500um	43.998		Grid-30-500um	59.774		Grid-30-500um	53.145		Grid-30-500um	42.565		Grid-30-500um	36.863
	Grid-30-500um	71.458		Grid-30-500um	59.063		Grid-30-500um	48.182		Grid-30-500um	44.698		Grid-30-500um	59.915		Grid-30-500um	53.065		Grid-30-500um	41.811		Grid-30-500um	38.174
	Grid-30-500um	70.057		Grid-30-500um	58.52		Grid-30-500um	45.014		Grid-30-500um	43.178		Grid-30-500um	59.41		Grid-30-500um	52.671		Grid-30-500um	41.464		Grid-30-500um	36.639
	Grid-30-500um	73.206		Grid-30-500um	58.265		Grid-30-500um	48.83		Grid-30-500um	43.945		Grid-30-500um	60.99		Grid-30-500um	52.431		Grid-30-500um	40.243		Grid-30-500um	37.42
	Grid-30-500um	74.663		Grid-30-500um	58.534		Grid-30-500um	45.999		Grid-30-500um	44.084		Grid-30-500um	60.425		Grid-30-500um	52.279		Grid-30-500um	41.167		Grid-30-500um	36.804
	Grid-30-500um	72.874		Grid-30-500um	57.101		Grid-30-500um	45.196		Grid-30-500um	43.519		Grid-30-500um	59.925		Grid-30-500um	53.194		Grid-30-500um	42.073		Grid-30-500um	36.689
	Grid-30-500um	72.98		Grid-30-500um	58.943		Grid-30-500um	48.012		Grid-30-500um	45.83		Grid-30-500um	60.146		Grid-30-500um	51.62		Grid-30-500um	41.69		Grid-30-500um	36.403
	Grid-30-500um	71.968		Grid-30-500um	58.19		Grid-30-500um	46.052		Grid-30-500um	43.656		Grid-30-500um	60.557		Grid-30-500um	52.294		Grid-30-500um	40.657		Grid-30-500um	38.046
	Grid-30-500um	73.444		Grid-30-500um	58.455		Grid-30-500um	46.796		Grid-30-500um	42.606		Grid-30-500um	60.755		Grid-30-500um	51.666		Grid-30-500um	41.802		Grid-30-500um	37.968
	Grid-30-500um	71.081		Grid-30-500um	56.539		Grid-30-500um	45.982		Grid-30-500um	40.474		Grid-30-500um	60.233		Grid-30-500um	50.818		Grid-30-500um	41.734		Grid-30-500um	37.889
	Grid-30-500um	69.765		Grid-30-500um	58.215		Grid-30-500um	46.967		Grid-30-500um	41.825		Grid-30-500um	60.428		Grid-30-500um	51.309		Grid-30-500um	40.62		Grid-30-500um	37.766
	Grid-30-500um	72.001		Grid-30-500um	57.207		Grid-30-500um	48.822		Grid-30-500um	40.31		Grid-30-500um	60.943		Grid-30-500um	51.03		Grid-30-500um	40.707		Grid-30-500um	36.926
	Grid-30-500um	70.873		Grid-30-500um	57.198		Grid-30-500um	48.428		Grid-30-500um	40.376		Grid-30-500um	59.15		Grid-30-500um	52.121		Grid-30-500um	40.526		Grid-30-500um	37.936
	Grid-30-500um	70.816		Grid-30-500um	59.538		Grid-30-500um	48.873		Grid-30-500um	40.785		Grid-30-500um	60.469		Grid-30-500um	52.059		Grid-30-500um	40.676		Grid-30-500um	39.011
	Grid-30-500um	73.86		Grid-30-500um	58.793		Grid-30-500um	48.381		Grid-30-500um	42.177		Grid-30-500um	59.466		Grid-30-500um	51.961		Grid-30-500um	40.486		Grid-30-500um	37.925
	Grid-30-500um	69.075		Grid-30-500um	58.077		Grid-30-500um	48.936		Grid-30-500um	42.826		Grid-30-500um	59.335		Grid-30-500um	52.938		Grid-30-500um	40.871		Grid-30-500um	37.421
	Grid-30-500um	70.158		Grid-30-500um	56.48		Grid-30-500um	48.121		Grid-30-500um	43.389		Grid-30-500um	59.138		Grid-30-500um	52.388		Grid-30-500um	39.453		Grid-30-500um	37.811
	Grid-30-500um	68.556		Grid-30-500um	58.73		Grid-30-500um	46.697		Grid-30-500um	44.864		Grid-30-500um	59.27		Grid-30-500um	51.777		Grid-30-500um	41.294		Grid-30-500um	37.153
	Grid-30-500um	65.899		Grid-30-500um	56.411		Grid-30-500um	47.982		Grid-30-500um	46.163		Grid-30-500um	58.305		Grid-30-500um	51.749		Grid-30-500um	39.802		Grid-30-500um	37.954
	Grid-30-500um	68.981		Grid-30-500um	55.802		Grid-30-500um	46.811		Grid-30-500um	48.192		Grid-30-500um	58.223		Grid-30-500um	51.346		Grid-30-500um	40.54		Grid-30-500um	37.292
	Grid-30-200um	85.679		Grid-30-200um	73.981		Grid-30-200um	55.32		Grid-30-200um	53.151		Grid-30-200um	73.069		Grid-30-200um	66.771		Grid-30-200um	49.792		Grid-30-200um	44.607
	Grid-30-200um	85.064		Grid-30-200um	75.842		Grid-30-200um	52.595		Grid-30-200um	54.527		Grid-30-200um	73.084		Grid-30-200um	66.798		Grid-30-200um	50.272		Grid-30-200um	43.732
	Grid-30-200um	85.6		Grid-30-200um	75.612		Grid-30-200um	52.356		Grid-30-200um	54.775		Grid-30-200um	71.555		Grid-30-200um	66.977		Grid-30-200um	50.426		Grid-30-200um	46.173
	Grid-30-200um	85.323		Grid-30-200um	74.992		Grid-30-200um	54.671		Grid-30-200um	47.505		Grid-30-200um	72.936		Grid-30-200um	68.488		Grid-30-200um	50.382		Grid-30-200um	45.468
	Grid-30-200um	85.969		Grid-30-200um	75.915		Grid-30-200um	54.639		Grid-30-200um	50.511		Grid-30-200um	71.693		Grid-30-200um	68.151		Grid-30-200um	49.729		Grid-30-200um	42.551
	Grid-30-200um	84.036		Grid-30-200um	74.059		Grid-30-200um	53.928		Grid-30-200um	49.889		Grid-30-200um	71.004		Grid-30-200um	69.099		Grid-30-200um	49.223		Grid-30-200um	45.383
	Grid-30-200um	86.409		Grid-30-200um	74.505		Grid-30-200um	54.372		Grid-30-200um	50.877		Grid-30-200um	71.547		Grid-30-200um	69.076		Grid-30-200um	49.063		Grid-30-200um	42.489
	Grid-30-200um	84.456		Grid-30-200um	70.533		Grid-30-200um	52.997		Grid-30-200um	52.362		Grid-30-200um	73.082		Grid-30-200um	67.382		Grid-30-200um	49.487		Grid-30-200um	43.668
	Grid-30-200um	84.29		Grid-30-200um	72.288		Grid-30-200um	54.625		Grid-30-200um	49.92		Grid-30-200um	71.602		Grid-30-200um	67.728		Grid-30-200um	49.838		Grid-30-200um	45.824
	Grid-30-200um	85.92		Grid-30-200um	71.973		Grid-30-200um	53.747		Grid-30-200um	46.236		Grid-30-200um	71.336		Grid-30-200um	66.789		Grid-30-200um	49.049		Grid-30-200um	44.077
	Grid-30-200um	84.453		Grid-30-200um	70.537		Grid-30-200um	52.611		Grid-30-200um	47.519		Grid-30-200um	71.714		Grid-30-200um	67.108		Grid-30-200um	50.085		Grid-30-200um	42.811
	Grid-30-200um	85.338		Grid-30-200um	73.942		Grid-30-200um	52.504		Grid-30-200um	52.253		Grid-30-200um	72.461		Grid-30-200um	67.697		Grid-30-200um	48.397		Grid-30-200um	42.65
	Grid-30-200um	84.631		Grid-30-200um	68.987		Grid-30-200um	54.621		Grid-30-200um	52.048		Grid-30-200um	71.698		Grid-30-200um	66.995		Grid-30-200um	48.676		Grid-30-200um	45.071
	Grid-30-200um	84.414		Grid-30-200um	75.485		Grid-30-200um	52.385		Grid-30-200um	53.056		Grid-30-200um	73.046		Grid-30-200um	67.605		Grid-30-200um	50.293		Grid-30-200um	43.907
	Grid-30-200um	84.603		Grid-30-200um	70.054		Grid-30-200um	54.934		Grid-30-200um	46.288		Grid-30-200um	72.435		Grid-30-200um	68.929		Grid-30-200um	50.297		Grid-30-200um	45.565
	Grid-30-200um	84.81		Grid-30-200um	72.879		Grid-30-200um	52.469		Grid-30-200um	50.439		Grid-30-200um	73.082		Grid-30-200um	68.146		Grid-30-200um	48.526		Grid-30-200um	45.215
	Grid-30-200um	85.137		Grid-30-200um	69.089		Grid-30-200um	54.796		Grid-30-200um	51.333		Grid-30-200um	73.04		Grid-30-200um	67.067		Grid-30-200um	49.066		Grid-30-200um	45.924
	Grid-30-200um	84.11		Grid-30-200um	74.51		Grid-30-200um	54.351		Grid-30-200um	50.98		Grid-30-200um	72.345		Grid-30-200um	68.8		Grid-30-200um	48.491		Grid-30-200um	45.655
	Grid-30-200um	84.141		Grid-30-200um	75.712		Grid-30-200um	53.186		Grid-30-200um	49.859		Grid-30-200um	73.167		Grid-30-200um	67.736		Grid-30-200um	49.357		Grid-30-200um	45.147
	Grid-30-200um	85.47		Grid-30-200um	75.064		Grid-30-200um	53.186		Grid-30-200um	50.657		Grid-30-200um	71.971		Grid-30-200um	66.488		Grid-30-200um	48.786		Grid-30-200um	45.738
	Grid-30-200um	85.743		Grid-30-200um	76.251		Grid-30-200um	53.829		Grid-30-200um	50.344		Grid-30-200um	73.379		Grid-30-200um	66.861		Grid-30-200um	49.844		Grid-30-200um	45.727
	Grid-30-200um	85.542		Grid-30-200um	75.662		Grid-30-200um	53.715		Grid-30-200um	49.124		Grid-30-200um	72.56		Grid-30-200um	68.81		Grid-30-200um	50.038		Grid-30-200um	45.223
	Grid-30-200um	86.134		Grid-30-200um	74.917		Grid-30-200um	55.545		Grid-30-200um	50.201		Grid-30-200um	73.05		Grid-30-200um	68.762		Grid-30-200um	48.96		Grid-30-200um	46.002
	Grid-30-200um	84.914		Grid-30-200um	75.894		Grid-30-200um	53.306		Grid-30-200um	53.074		Grid-30-200um	73.144		Grid-30-200um	67.529		Grid-30-200um	49.47		Grid-30-200um	45.18
	Grid-30-200um	86.504		Grid-30-200um	75.297		Grid-30-200um	52.863		Grid-30-200um	50.442		Grid-30-200um	72.337		Grid-30-200um	68.244		Grid-30-200um	49.91		Grid-30-200um	45.319

## Sheet: AvgChrome-Grid30
	Chrome-MBlade-Black60-WhPET-Grid30			Chrome-MBlade-Black60-ClrPET-Grid30			Chrome-MBlade-ECI7007-WhPET-Grid30			Chrome-MBlade-ECI7007-ClrPET-Grid30			Chrome-PBlade-Black60-WhPET-Grid30			Chrome-PBlade-Black60-ClrPET-Grid30			Chrome-PBlade-ECI7007-WhPET-Grid30			Chrome-PBlade-ECI7007-ClrPET-Grid30
	Design	White PET Line Width (µm)		Design	ClrPET Line Width (µm)		Design	White PET Line Width (µm)		Design	ClrPET Line Width (µm)		Design	White PET Line Width (µm)		Design	ClrPET Line Width (µm)		Design	White PET Line Width (µm)		Design	ClrPET Line Width (µm)
	Chrome-MBlade-Black60 - Grid-30-1000um	67.127		Chrome-MBlade-Black60 - Grid-30-1000um	54.6201		Chrome-MBlade-ECI7007 - Grid-30-1000um	46.1797		Chrome-MBlade-ECI7007 - Grid-30-1000um	36.2983		ChromePBlade-Black60 - Grid-30-1000um	58.6837		ChromePBlade-Black60 - Grid-30-1000um	47.917		ChromePBlade-ECI7007-Grid-30-1000um	38.1872		ChromePBlade-ECI7007-Grid-30-1000um	34.3265
	Chrome-MBlade-Black60 - Grid-30-500um	71.3064		Chrome-MBlade-Black60 - Grid-30-500um	58.0289		Chrome-MBlade-ECI7007 - Grid-30-500um	47.5198		Chrome-MBlade-ECI7007 - Grid-30-500um	43.5224		ChromePBlade-Black60 - Grid-30-500um	59.8952		ChromePBlade-Black60 - Grid-30-500um	51.8168		ChromePBlade-ECI7007-Grid-30-500um	40.735		ChromePBlade-ECI7007-Grid-30-500um	37.4136
	Chrome-MBlade-Black60 - Grid-30-200um	85.1476		Chrome-MBlade-Black60 - Grid-30-200um	73.7592		Chrome-MBlade-ECI7007 - Grid-30-200um	53.742		Chrome-MBlade-ECI7007 - Grid-30-200um	50.6948		ChromePBlade-Black60 - Grid-30-200um	72.4135		ChromePBlade-Black60 - Grid-30-200um	67.7614		ChromePBlade-ECI7007-Grid-30-200um	49.4983		ChromePBlade-ECI7007-Grid-30-200um	44.7642

## Sheet: Standard DLC-Grid20
	Trial 1 Experiment			Trial 2 Experiment			Trial 3 Experiment			Trial 4 Experiment			Trial 5 Experiment			Trial 6 Experiment			Trial 7 Experiment			Trial 8 Experiment
	StdDLC-MBlade-Black60-WhPET-Grid20			StdDLC-MBlade-Black60-ClrPET-Grid20			StdDLC-MBlade-ECI7007-WhPET-Grid20			StdDLC-MBlade-ECI7007-ClrPET-Grid20			StdDLC-PBlade-Black60-WhPET-Grid20			StdDLC-PBlade-Black60-ClrPET-Grid20			StdDLC-PBlade-ECI7007-WhPET-Grid20			StdDLC-PBlade-ECI7007-ClrPET-Grid20
	Design	Line Width (µm)		Design	Line Width (µm)		Design	Line Width (µm)		Design	Line Width (µm)		Design	Line Width (µm)		Design	Line Width (µm)		Design	Line Width (µm)		Design	Line Width (µm)
	Grid-20-1000um	51.471		Grid-20-1000um	41.222		Grid-20-1000um	37.08		Grid-20-1000um	25.2		Grid-20-1000um	38.75		Grid-20-1000um	32.197		Grid-20-1000um	25.699		Grid-20-1000um	20.862
	Grid-20-1000um	52.419		Grid-20-1000um	41.406		Grid-20-1000um	36.538		Grid-20-1000um	25.697		Grid-20-1000um	38.465		Grid-20-1000um	31.423		Grid-20-1000um	26.949		Grid-20-1000um	21.164
	Grid-20-1000um	50.362		Grid-20-1000um	41.864		Grid-20-1000um	36.334		Grid-20-1000um	28.811		Grid-20-1000um	38.879		Grid-20-1000um	32.339		Grid-20-1000um	27.147		Grid-20-1000um	21.044
	Grid-20-1000um	50.864		Grid-20-1000um	41.388		Grid-20-1000um	36.858		Grid-20-1000um	28.517		Grid-20-1000um	39.101		Grid-20-1000um	31.239		Grid-20-1000um	25.054		Grid-20-1000um	19.475
	Grid-20-1000um	51.699		Grid-20-1000um	41.832		Grid-20-1000um	35.877		Grid-20-1000um	29.68		Grid-20-1000um	39.759		Grid-20-1000um	31.303		Grid-20-1000um	28.241		Grid-20-1000um	18.619
	Grid-20-1000um	51.517		Grid-20-1000um	41.622		Grid-20-1000um	36.215		Grid-20-1000um	27.88		Grid-20-1000um	39.203		Grid-20-1000um	31.233		Grid-20-1000um	25.831		Grid-20-1000um	19.215
	Grid-20-1000um	51.254		Grid-20-1000um	41.335		Grid-20-1000um	37.969		Grid-20-1000um	25.154		Grid-20-1000um	40.623		Grid-20-1000um	31.681		Grid-20-1000um	27.335		Grid-20-1000um	19.05
	Grid-20-1000um	52.314		Grid-20-1000um	41.619		Grid-20-1000um	35.341		Grid-20-1000um	27.551		Grid-20-1000um	40.153		Grid-20-1000um	30.89		Grid-20-1000um	25.258		Grid-20-1000um	19.247
	Grid-20-1000um	51.872		Grid-20-1000um	41.553		Grid-20-1000um	37.487		Grid-20-1000um	26.437		Grid-20-1000um	40.286		Grid-20-1000um	30.779		Grid-20-1000um	28.676		Grid-20-1000um	19.344
	Grid-20-1000um	51.086		Grid-20-1000um	41.876		Grid-20-1000um	35.003		Grid-20-1000um	26.43		Grid-20-1000um	39.917		Grid-20-1000um	30.806		Grid-20-1000um	25.98		Grid-20-1000um	21.759
	Grid-20-1000um	52.252		Grid-20-1000um	41.481		Grid-20-1000um	35.61		Grid-20-1000um	28.067		Grid-20-1000um	41.019		Grid-20-1000um	31.148		Grid-20-1000um	26.95		Grid-20-1000um	21.063
	Grid-20-1000um	52.868		Grid-20-1000um	41.147		Grid-20-1000um	35.008		Grid-20-1000um	28.13		Grid-20-1000um	39.891		Grid-20-1000um	31.683		Grid-20-1000um	26.027		Grid-20-1000um	21.407
	Grid-20-1000um	52.288		Grid-20-1000um	41.91		Grid-20-1000um	35.754		Grid-20-1000um	28.125		Grid-20-1000um	39.461		Grid-20-1000um	31.143		Grid-20-1000um	26.382		Grid-20-1000um	19.698
	Grid-20-1000um	50.281		Grid-20-1000um	42.546		Grid-20-1000um	35.003		Grid-20-1000um	28.721		Grid-20-1000um	39.925		Grid-20-1000um	31.969		Grid-20-1000um	26.668		Grid-20-1000um	20.083
	Grid-20-1000um	50.627		Grid-20-1000um	41.987		Grid-20-1000um	35.427		Grid-20-1000um	26.951		Grid-20-1000um	38.187		Grid-20-1000um	31.828		Grid-20-1000um	25.47		Grid-20-1000um	19.811
	Grid-20-1000um	50.998		Grid-20-1000um	41.38		Grid-20-1000um	35.341		Grid-20-1000um	25.842		Grid-20-1000um	38.277		Grid-20-1000um	31.247		Grid-20-1000um	25.018		Grid-20-1000um	20.967
	Grid-20-1000um	50.551		Grid-20-1000um	41.913		Grid-20-1000um	37.487		Grid-20-1000um	25.829		Grid-20-1000um	38.299		Grid-20-1000um	30.877		Grid-20-1000um	26.379		Grid-20-1000um	20.53
	Grid-20-1000um	51.143		Grid-20-1000um	41.805		Grid-20-1000um	37.324		Grid-20-1000um	28.039		Grid-20-1000um	39.481		Grid-20-1000um	32.017		Grid-20-1000um	25.431		Grid-20-1000um	20.56
	Grid-20-1000um	51.409		Grid-20-1000um	40.935		Grid-20-1000um	37.56		Grid-20-1000um	23.584		Grid-20-1000um	39.393		Grid-20-1000um	32.081		Grid-20-1000um	26.725		Grid-20-1000um	23.557
	Grid-20-1000um	51.115		Grid-20-1000um	41.792		Grid-20-1000um	39.135		Grid-20-1000um	25.49		Grid-20-1000um	39.664		Grid-20-1000um	31.57		Grid-20-1000um	26.401		Grid-20-1000um	21.432
	Grid-20-1000um	51.149		Grid-20-1000um	41.256		Grid-20-1000um	37.324		Grid-20-1000um	26.81		Grid-20-1000um	39.882		Grid-20-1000um	31.707		Grid-20-1000um	27.746		Grid-20-1000um	20.617
	Grid-20-1000um	51.22		Grid-20-1000um	41.957		Grid-20-1000um	35.258		Grid-20-1000um	26.02		Grid-20-1000um	39.148		Grid-20-1000um	32.702		Grid-20-1000um	26.996		Grid-20-1000um	21.269
	Grid-20-1000um	52.007		Grid-20-1000um	42.133		Grid-20-1000um	35.766		Grid-20-1000um	24.431		Grid-20-1000um	38.817		Grid-20-1000um	32.476		Grid-20-1000um	25.873		Grid-20-1000um	19.238
	Grid-20-1000um	51.907		Grid-20-1000um	42.017		Grid-20-1000um	36.341		Grid-20-1000um	25.759		Grid-20-1000um	38.722		Grid-20-1000um	32.676		Grid-20-1000um	25.797		Grid-20-1000um	21.099
	Grid-20-1000um	50.834		Grid-20-1000um	41.808		Grid-20-1000um	34.276		Grid-20-1000um	24.689		Grid-20-1000um	38.428		Grid-20-1000um	32.732		Grid-20-1000um	25.048		Grid-20-1000um	21.436
	Grid-20-500um	57.619		Grid-20-500um	44.977		Grid-20-500um	40.778		Grid-20-500um	29.875		Grid-20-500um	45.109		Grid-20-500um	37.665		Grid-20-500um	33.426		Grid-20-500um	24.218
	Grid-20-500um	56.81		Grid-20-500um	44.586		Grid-20-500um	36.149		Grid-20-500um	28.83		Grid-20-500um	44.506		Grid-20-500um	37.624		Grid-20-500um	32.932		Grid-20-500um	24.192
	Grid-20-500um	60.551		Grid-20-500um	45.929		Grid-20-500um	40.484		Grid-20-500um	29.847		Grid-20-500um	44.511		Grid-20-500um	38.195		Grid-20-500um	34.016		Grid-20-500um	23.763
	Grid-20-500um	58.142		Grid-20-500um	44.753		Grid-20-500um	40.681		Grid-20-500um	30.934		Grid-20-500um	44.907		Grid-20-500um	37.831		Grid-20-500um	33.686		Grid-20-500um	24.041
	Grid-20-500um	56.825		Grid-20-500um	45.97		Grid-20-500um	41.23		Grid-20-500um	30.725		Grid-20-500um	44.786		Grid-20-500um	38.319		Grid-20-500um	33.685		Grid-20-500um	25.054
	Grid-20-500um	56.572		Grid-20-500um	44.919		Grid-20-500um	40.587		Grid-20-500um	30.1		Grid-20-500um	44.798		Grid-20-500um	38.23		Grid-20-500um	33.039		Grid-20-500um	24.772
	Grid-20-500um	56.47		Grid-20-500um	44.731		Grid-20-500um	40.083		Grid-20-500um	27.592		Grid-20-500um	45.115		Grid-20-500um	38.347		Grid-20-500um	33.916		Grid-20-500um	24.911
	Grid-20-500um	56.848		Grid-20-500um	45.748		Grid-20-500um	40.007		Grid-20-500um	27.821		Grid-20-500um	44.906		Grid-20-500um	37.18		Grid-20-500um	32.841		Grid-20-500um	24.636
	Grid-20-500um	55.136		Grid-20-500um	45.372		Grid-20-500um	40.035		Grid-20-500um	28.77		Grid-20-500um	44.849		Grid-20-500um	38.123		Grid-20-500um	34.776		Grid-20-500um	23.287
	Grid-20-500um	58.803		Grid-20-500um	44.278		Grid-20-500um	40.841		Grid-20-500um	29.318		Grid-20-500um	44.989		Grid-20-500um	38.451		Grid-20-500um	32.654		Grid-20-500um	25.251
	Grid-20-500um	57.924		Grid-20-500um	45.234		Grid-20-500um	39.485		Grid-20-500um	28.921		Grid-20-500um	44.578		Grid-20-500um	37.646		Grid-20-500um	33.868		Grid-20-500um	23.576
	Grid-20-500um	60.816		Grid-20-500um	44.356		Grid-20-500um	40.949		Grid-20-500um	29.391		Grid-20-500um	45.184		Grid-20-500um	38.17		Grid-20-500um	33.826		Grid-20-500um	23.996
	Grid-20-500um	58.195		Grid-20-500um	45.56		Grid-20-500um	39.331		Grid-20-500um	27.712		Grid-20-500um	45.199		Grid-20-500um	37.44		Grid-20-500um	34.152		Grid-20-500um	23.519
	Grid-20-500um	54.764		Grid-20-500um	44.018		Grid-20-500um	40.417		Grid-20-500um	27.664		Grid-20-500um	45.295		Grid-20-500um	38.438		Grid-20-500um	33.489		Grid-20-500um	23.894
	Grid-20-500um	56.341		Grid-20-500um	44.214		Grid-20-500um	40.668		Grid-20-500um	26.061		Grid-20-500um	45.187		Grid-20-500um	37.841		Grid-20-500um	32.649		Grid-20-500um	24.087
	Grid-20-500um	55.949		Grid-20-500um	44.631		Grid-20-500um	40.608		Grid-20-500um	27.308		Grid-20-500um	44.838		Grid-20-500um	38.185		Grid-20-500um	31.295		Grid-20-500um	24.321
	Grid-20-500um	56.665		Grid-20-500um	44.279		Grid-20-500um	40.978		Grid-20-500um	27.825		Grid-20-500um	45.565		Grid-20-500um	37.168		Grid-20-500um	32.169		Grid-20-500um	22.826
	Grid-20-500um	55.173		Grid-20-500um	44.699		Grid-20-500um	39.956		Grid-20-500um	27.04		Grid-20-500um	44.846		Grid-20-500um	38.551		Grid-20-500um	33.987		Grid-20-500um	24.46
	Grid-20-500um	56.314		Grid-20-500um	44.044		Grid-20-500um	40.336		Grid-20-500um	28.961		Grid-20-500um	44.784		Grid-20-500um	38.568		Grid-20-500um	32.403		Grid-20-500um	24.269
	Grid-20-500um	54.506		Grid-20-500um	44.354		Grid-20-500um	38.84		Grid-20-500um	27.349		Grid-20-500um	45.037		Grid-20-500um	38.072		Grid-20-500um	32.285		Grid-20-500um	24.115
	Grid-20-500um	56.64		Grid-20-500um	44.421		Grid-20-500um	37.131		Grid-20-500um	28.44		Grid-20-500um	45.065		Grid-20-500um	38.312		Grid-20-500um	33.418		Grid-20-500um	23.36
	Grid-20-500um	55.859		Grid-20-500um	44.583		Grid-20-500um	36.25		Grid-20-500um	28.795		Grid-20-500um	44.981		Grid-20-500um	37.854		Grid-20-500um	32.526		Grid-20-500um	25.573
	Grid-20-500um	57.421		Grid-20-500um	44.192		Grid-20-500um	36.672		Grid-20-500um	29.749		Grid-20-500um	45.445		Grid-20-500um	38.213		Grid-20-500um	33.048		Grid-20-500um	26.53
	Grid-20-500um	58.516		Grid-20-500um	45.494		Grid-20-500um	36.672		Grid-20-500um	29.009		Grid-20-500um	45.078		Grid-20-500um	37.081		Grid-20-500um	33.167		Grid-20-500um	25.894
	Grid-20-500um	59.937		Grid-20-500um	45.857		Grid-20-500um	36.139		Grid-20-500um	27.975		Grid-20-500um	44.699		Grid-20-500um	37.673		Grid-20-500um	32.75		Grid-20-500um	26.576
	Grid-20-200um	59.762		Grid-20-200um	51.154		Grid-20-200um	39.2		Grid-20-200um	35.467		Grid-20-200um	55.744		Grid-20-200um	49.311		Grid-20-200um	40.262		Grid-20-200um	32.997
	Grid-20-200um	59.65		Grid-20-200um	50.28		Grid-20-200um	37.904		Grid-20-200um	35.315		Grid-20-200um	54.981		Grid-20-200um	50.289		Grid-20-200um	40.363		Grid-20-200um	33.303
	Grid-20-200um	60.305		Grid-20-200um	50.533		Grid-20-200um	39.26		Grid-20-200um	36.253		Grid-20-200um	54.631		Grid-20-200um	51.217		Grid-20-200um	38.746		Grid-20-200um	32.603
	Grid-20-200um	60.276		Grid-20-200um	51.539		Grid-20-200um	39.431		Grid-20-200um	35.602		Grid-20-200um	55.312		Grid-20-200um	49.143		Grid-20-200um	40.619		Grid-20-200um	33.016
	Grid-20-200um	59.766		Grid-20-200um	50.026		Grid-20-200um	42.774		Grid-20-200um	35.894		Grid-20-200um	52.361		Grid-20-200um	49.152		Grid-20-200um	38.42		Grid-20-200um	32.24
	Grid-20-200um	59.159		Grid-20-200um	50.549		Grid-20-200um	39.797		Grid-20-200um	36.42		Grid-20-200um	54.338		Grid-20-200um	49.002		Grid-20-200um	38.569		Grid-20-200um	33.578
	Grid-20-200um	59.636		Grid-20-200um	51.133		Grid-20-200um	41.764		Grid-20-200um	36.866		Grid-20-200um	54.714		Grid-20-200um	49.513		Grid-20-200um	39.832		Grid-20-200um	33.663
	Grid-20-200um	59.782		Grid-20-200um	50.94		Grid-20-200um	39.638		Grid-20-200um	34.772		Grid-20-200um	54.897		Grid-20-200um	49.512		Grid-20-200um	38.189		Grid-20-200um	33.012
	Grid-20-200um	61.381		Grid-20-200um	51.015		Grid-20-200um	44.084		Grid-20-200um	33.88		Grid-20-200um	55.76		Grid-20-200um	48.222		Grid-20-200um	40.107		Grid-20-200um	32.542
	Grid-20-200um	60.41		Grid-20-200um	50.262		Grid-20-200um	42.46		Grid-20-200um	33.056		Grid-20-200um	55.991		Grid-20-200um	48.298		Grid-20-200um	41.87		Grid-20-200um	31.143
	Grid-20-200um	59.979		Grid-20-200um	51.516		Grid-20-200um	36.957		Grid-20-200um	31.754		Grid-20-200um	55.572		Grid-20-200um	49.326		Grid-20-200um	41.976		Grid-20-200um	31.883
	Grid-20-200um	59.234		Grid-20-200um	52.132		Grid-20-200um	39.915		Grid-20-200um	33.935		Grid-20-200um	55.402		Grid-20-200um	51.169		Grid-20-200um	39.605		Grid-20-200um	32.694
	Grid-20-200um	60.104		Grid-20-200um	53.005		Grid-20-200um	41.755		Grid-20-200um	33.177		Grid-20-200um	54.782		Grid-20-200um	48.366		Grid-20-200um	39.149		Grid-20-200um	32.581
	Grid-20-200um	59.859		Grid-20-200um	51.41		Grid-20-200um	39.964		Grid-20-200um	32.858		Grid-20-200um	54.361		Grid-20-200um	50.718		Grid-20-200um	40.098		Grid-20-200um	31.507
	Grid-20-200um	59.856		Grid-20-200um	51.817		Grid-20-200um	43.527		Grid-20-200um	35.693		Grid-20-200um	51.282		Grid-20-200um	53.478		Grid-20-200um	39.092		Grid-20-200um	32.631
	Grid-20-200um	60.558		Grid-20-200um	53.183		Grid-20-200um	37.161		Grid-20-200um	33.172		Grid-20-200um	55.176		Grid-20-200um	52.26		Grid-20-200um	39.321		Grid-20-200um	33.84
	Grid-20-200um	59.568		Grid-20-200um	52.363		Grid-20-200um	42.192		Grid-20-200um	32.719		Grid-20-200um	52.122		Grid-20-200um	52.219		Grid-20-200um	38.933		Grid-20-200um	31.498
	Grid-20-200um	58.39		Grid-20-200um	51.498		Grid-20-200um	38.464		Grid-20-200um	33.027		Grid-20-200um	52.661		Grid-20-200um	51.48		Grid-20-200um	41.01		Grid-20-200um	31.334
	Grid-20-200um	59.334		Grid-20-200um	52.36		Grid-20-200um	39.708		Grid-20-200um	34.866		Grid-20-200um	57.719		Grid-20-200um	52.44		Grid-20-200um	39.979		Grid-20-200um	31.571
	Grid-20-200um	60.078		Grid-20-200um	53.68		Grid-20-200um	46.501		Grid-20-200um	34.664		Grid-20-200um	51.202		Grid-20-200um	51.646		Grid-20-200um	38.804		Grid-20-200um	33.476
	Grid-20-200um	60.1		Grid-20-200um	52.129		Grid-20-200um	36.877		Grid-20-200um	33.672		Grid-20-200um	51.166		Grid-20-200um	52.3		Grid-20-200um	39.144		Grid-20-200um	33.356
	Grid-20-200um	60.784		Grid-20-200um	52.105		Grid-20-200um	42.511		Grid-20-200um	34.93		Grid-20-200um	51.919		Grid-20-200um	52.831		Grid-20-200um	38.222		Grid-20-200um	32.211
	Grid-20-200um	59.523		Grid-20-200um	52.09		Grid-20-200um	37.802		Grid-20-200um	33.896		Grid-20-200um	51.133		Grid-20-200um	52.185		Grid-20-200um	40.847		Grid-20-200um	30.527
	Grid-20-200um	59.213		Grid-20-200um	53.64		Grid-20-200um	38.81		Grid-20-200um	34.896		Grid-20-200um	51.753		Grid-20-200um	52.43		Grid-20-200um	38.966		Grid-20-200um	31.739
	Grid-20-200um	60.162		Grid-20-200um	51.929		Grid-20-200um	38.545		Grid-20-200um	32.367		Grid-20-200um	51.769		Grid-20-200um	51.687		Grid-20-200um	39.404		Grid-20-200um	32.25

## Sheet: AvgStandard DLC-Grid20
	StdDLC-MBlade-Black60-WhPET-Grid20			StdDLC-MBlade-Black60-ClrPET-Grid20			StdDLC-MBlade-ECI7007-WhPET-Grid20			StdDLC-MBlade-ECI7007-ClrPET-Grid20			StdDLC-PBlade-Black60-WhPET-Grid20			StdDLC-PBlade-Black60-ClrPET-Grid20			StdDLC-PBlade-ECI7007-WhPET-Grid20			StdDLC-PBlade-ECI7007-ClrPET-Grid20
	Design	White PET Line Width (µm)		Design	ClrPET Line Width (µm)		Design	White PET Line Width (µm)		Design	ClrPET Line Width (µm)		Design	White PET Line Width (µm)		Design	ClrPET Line Width (µm)		Design	White PET Line Width (µm)		Design	ClrPET Line Width (µm)
	STDDLC-MBlade-Black60 - Grid-20-1000um	51.4203		STDDLC-MBlade-Black60 - Grid-20-1000um	41.6714		STDDLC-MBlade-ECI7007 - Grid-20-1000um	36.2926		STDDLC-MBlade-ECI7007 - Grid-20-1000um	26.7138		StdDLC-PBlade-Black60 - Grid-20-1000um	39.3492		StdDLC-PBlade-Black60 - Grid-20-1000um	31.6698		StdDLC-PBlade-ECI7007-Grid-20-1000um	26.3632		StdDLC-PBlade-ECI7007-Grid-20-1000um	20.5018
	STDDLC-MBlade-Black60 - Grid-20-500um	57.1518		STDDLC-MBlade-Black60 - Grid-20-500um	44.848		STDDLC-MBlade-ECI7007 - Grid-20-500um	39.4123		STDDLC-MBlade-ECI7007 - Grid-20-500um	28.6405		StdDLC-PBlade-Black60 - Grid-20-500um	44.9703		StdDLC-PBlade-Black60 - Grid-20-500um	37.9671		StdDLC-PBlade-ECI7007-Grid-20-500um	33.2001		StdDLC-PBlade-ECI7007-Grid-20-500um	24.4448
	STDDLC-MBlade-Black60 - Grid-20-200um	59.8748		STDDLC-MBlade-Black60 - Grid-20-200um	51.6915		STDDLC-MBlade-ECI7007 - Grid-20-200um	40.28		STDDLC-MBlade-ECI7007 - Grid-20-200um	34.366		StdDLC-PBlade-Black60 - Grid-20-200um	53.8699		StdDLC-PBlade-Black60 - Grid-20-200um	50.7278		StdDLC-PBlade-ECI7007-Grid-20-200um	39.6611		StdDLC-PBlade-ECI7007-Grid-20-200um	32.4478
	Grid-20-500um	57.619
	Grid-20-500um	56.81
	Grid-20-500um	60.551
	Grid-20-500um	58.142
	Grid-20-500um	56.825
	Grid-20-500um	56.572
	Grid-20-500um	56.47
	Grid-20-500um	56.848
	Grid-20-500um	62.746
	Grid-20-500um	58.803
	Grid-20-500um	57.924
	Grid-20-500um	60.816
	Grid-20-500um	64.622
	Grid-20-500um	54.764
	Grid-20-500um	56.341
	Grid-20-500um	55.949
	Grid-20-500um	56.665
	Grid-20-500um	55.173
	Grid-20-500um	56.314
	Grid-20-500um	54.506
	Grid-20-500um	56.64
	Grid-20-500um	55.859
	Grid-20-500um	57.421
	Grid-20-500um	58.516
	Grid-20-500um	59.937
	Grid-20-200um	59.762
	Grid-20-200um	59.65
	Grid-20-200um	60.305
	Grid-20-200um	60.276
	Grid-20-200um	59.766
	Grid-20-200um	62.635
	Grid-20-200um	59.636
	Grid-20-200um	59.782
	Grid-20-200um	61.381
	Grid-20-200um	60.41
	Grid-20-200um	59.979
	Grid-20-200um	59.234
	Grid-20-200um	60.104
	Grid-20-200um	59.859
	Grid-20-200um	59.856
	Grid-20-200um	60.558
	Grid-20-200um	63.051
	Grid-20-200um	63.283
	Grid-20-200um	59.334
	Grid-20-200um	60.078
	Grid-20-200um	60.1
	Grid-20-200um	60.784
	Grid-20-200um	59.523
	Grid-20-200um	59.213
	Grid-20-200um	60.162

## Sheet: Standard DLC-Grid30
	Trial 1 Experiment			Trial 2 Experiment			Trial 3 Experiment			Trial 4 Experiment			Trial 5 Experiment			Trial 6 Experiment			Trial 7 Experiment			Trial 8 Experiment
	StdDLC-MBlade-Black60-WhPET-Grid30			StdDLC-MBlade-Black60-ClrPET-Grid30			StdDLC-MBlade-ECI7007-WhPET-Grid30			StdDLC-MBlade-ECI7007-ClrPET-Grid30			StdDLC-PBlade-Black60-WhPET-Grid30			StdDLC-PBlade-Black60-ClrPET-Grid30			StdDLC-PBlade-ECI7007-WhPET-Grid30			StdDLC-PBlade-ECI7007-ClrPET-Grid30
	Design	Line Width (µm)		Design	Line Width (µm)		Design	Line Width (µm)		Design	Line Width (µm)		Design	Line Width (µm)		Design	Line Width (µm)		Design	Line Width (µm)		Design	Line Width (µm)
	Grid-30-1000um	71.133		Grid-30-1000um	61.191		Grid-30-1000um	48.197		Grid-30-1000um	38.941		Grid-30-1000um	60.543		Grid-30-1000um	47.658		Grid-30-1000um	42.817		Grid-30-1000um	32.804
	Grid-30-1000um	73.195		Grid-30-1000um	61.999		Grid-30-1000um	51.619		Grid-30-1000um	39.329		Grid-30-1000um	60.61		Grid-30-1000um	47.006		Grid-30-1000um	40.227		Grid-30-1000um	32.628
	Grid-30-1000um	76.437		Grid-30-1000um	60.447		Grid-30-1000um	49.465		Grid-30-1000um	39.591		Grid-30-1000um	60.484		Grid-30-1000um	46.896		Grid-30-1000um	40.537		Grid-30-1000um	31.884
	Grid-30-1000um	73.82		Grid-30-1000um	61.056		Grid-30-1000um	48.411		Grid-30-1000um	38.516		Grid-30-1000um	60.648		Grid-30-1000um	47.35		Grid-30-1000um	40.799		Grid-30-1000um	31.367
	Grid-30-1000um	71.936		Grid-30-1000um	60.586		Grid-30-1000um	50.776		Grid-30-1000um	42.109		Grid-30-1000um	59.725		Grid-30-1000um	47.458		Grid-30-1000um	42.748		Grid-30-1000um	34.997
	Grid-30-1000um	72.302		Grid-30-1000um	61.491		Grid-30-1000um	47.343		Grid-30-1000um	43.562		Grid-30-1000um	59.375		Grid-30-1000um	47.679		Grid-30-1000um	41.71		Grid-30-1000um	34.019
	Grid-30-1000um	74.195		Grid-30-1000um	61.217		Grid-30-1000um	49.451		Grid-30-1000um	43.951		Grid-30-1000um	59.874		Grid-30-1000um	46.124		Grid-30-1000um	42.903		Grid-30-1000um	34.818
	Grid-30-1000um	73.281		Grid-30-1000um	64.611		Grid-30-1000um	50.514		Grid-30-1000um	39.922		Grid-30-1000um	57.856		Grid-30-1000um	47.043		Grid-30-1000um	41.638		Grid-30-1000um	36.363
	Grid-30-1000um	71.554		Grid-30-1000um	60.765		Grid-30-1000um	50.581		Grid-30-1000um	39.651		Grid-30-1000um	57.951		Grid-30-1000um	47.403		Grid-30-1000um	42.703		Grid-30-1000um	36.111
	Grid-30-1000um	73.99		Grid-30-1000um	62.252		Grid-30-1000um	51.562		Grid-30-1000um	39.966		Grid-30-1000um	58.419		Grid-30-1000um	47.611		Grid-30-1000um	42.902		Grid-30-1000um	35.681
	Grid-30-1000um	72.34		Grid-30-1000um	62.803		Grid-30-1000um	53.565		Grid-30-1000um	39.981		Grid-30-1000um	58.084		Grid-30-1000um	48.909		Grid-30-1000um	41.087		Grid-30-1000um	34.276
	Grid-30-1000um	73.581		Grid-30-1000um	60.817		Grid-30-1000um	52.544		Grid-30-1000um	38.422		Grid-30-1000um	58.064		Grid-30-1000um	49.361		Grid-30-1000um	40.903		Grid-30-1000um	35.113
	Grid-30-1000um	73.374		Grid-30-1000um	60.62		Grid-30-1000um	48.418		Grid-30-1000um	39.851		Grid-30-1000um	58.19		Grid-30-1000um	49.56		Grid-30-1000um	40.648		Grid-30-1000um	33.962
	Grid-30-1000um	74.343		Grid-30-1000um	62.998		Grid-30-1000um	50.484		Grid-30-1000um	38.786		Grid-30-1000um	57.608		Grid-30-1000um	46.973		Grid-30-1000um	39.7		Grid-30-1000um	37.131
	Grid-30-1000um	75.57		Grid-30-1000um	63.014		Grid-30-1000um	47.392		Grid-30-1000um	38.931		Grid-30-1000um	58.153		Grid-30-1000um	46.457		Grid-30-1000um	39.39		Grid-30-1000um	37.04
	Grid-30-1000um	75.962		Grid-30-1000um	63.249		Grid-30-1000um	51.147		Grid-30-1000um	38.339		Grid-30-1000um	57.85		Grid-30-1000um	47.534		Grid-30-1000um	39		Grid-30-1000um	36.689
	Grid-30-1000um	76.451		Grid-30-1000um	62.973		Grid-30-1000um	50.836		Grid-30-1000um	39.091		Grid-30-1000um	58.936		Grid-30-1000um	48.442		Grid-30-1000um	41.448		Grid-30-1000um	36.054
	Grid-30-1000um	73.508		Grid-30-1000um	60.606		Grid-30-1000um	50.379		Grid-30-1000um	39.596		Grid-30-1000um	58.417		Grid-30-1000um	47.091		Grid-30-1000um	43.72		Grid-30-1000um	34.785
	Grid-30-1000um	73.567		Grid-30-1000um	61.538		Grid-30-1000um	51.852		Grid-30-1000um	42.009		Grid-30-1000um	59.646		Grid-30-1000um	49.489		Grid-30-1000um	42.62		Grid-30-1000um	39.568
	Grid-30-1000um	73.677		Grid-30-1000um	60.446		Grid-30-1000um	48.426		Grid-30-1000um	42.572		Grid-30-1000um	60.418		Grid-30-1000um	47.508		Grid-30-1000um	43.631		Grid-30-1000um	36.422
	Grid-30-1000um	72.464		Grid-30-1000um	61.649		Grid-30-1000um	52.096		Grid-30-1000um	43.801		Grid-30-1000um	60.392		Grid-30-1000um	47.463		Grid-30-1000um	44.098		Grid-30-1000um	36.774
	Grid-30-1000um	70.789		Grid-30-1000um	62.319		Grid-30-1000um	52.926		Grid-30-1000um	41.724		Grid-30-1000um	60.97		Grid-30-1000um	49.654		Grid-30-1000um	41.54		Grid-30-1000um	37.678
	Grid-30-1000um	73.036		Grid-30-1000um	63.063		Grid-30-1000um	47.463		Grid-30-1000um	42.242		Grid-30-1000um	61.65		Grid-30-1000um	49.767		Grid-30-1000um	41.778		Grid-30-1000um	37.883
	Grid-30-1000um	73.177		Grid-30-1000um	63.288		Grid-30-1000um	48.184		Grid-30-1000um	43.706		Grid-30-1000um	61.325		Grid-30-1000um	49.814		Grid-30-1000um	44.725		Grid-30-1000um	38.21
	Grid-30-1000um	72.709		Grid-30-1000um	67.189		Grid-30-1000um	48.401		Grid-30-1000um	43.11		Grid-30-1000um	58.437		Grid-30-1000um	49.776		Grid-30-1000um	43.944		Grid-30-1000um	38.325
	Grid-30-500um	77.392		Grid-30-500um	64.454		Grid-30-500um	51.829		Grid-30-500um	47.094		Grid-30-500um	63.552		Grid-30-500um	55.73		Grid-30-500um	45.207		Grid-30-500um	38.698
	Grid-30-500um	76.84		Grid-30-500um	65.108		Grid-30-500um	52.434		Grid-30-500um	47.455		Grid-30-500um	64.375		Grid-30-500um	55.421		Grid-30-500um	44.139		Grid-30-500um	40.146
	Grid-30-500um	78.666		Grid-30-500um	63.136		Grid-30-500um	52.719		Grid-30-500um	46.522		Grid-30-500um	64.754		Grid-30-500um	57.257		Grid-30-500um	44.15		Grid-30-500um	38.95
	Grid-30-500um	76.13		Grid-30-500um	64.497		Grid-30-500um	51.011		Grid-30-500um	48.43		Grid-30-500um	64.235		Grid-30-500um	55.124		Grid-30-500um	46.862		Grid-30-500um	39.143
	Grid-30-500um	75.165		Grid-30-500um	65.425		Grid-30-500um	51.783		Grid-30-500um	45.283		Grid-30-500um	63.149		Grid-30-500um	55.36		Grid-30-500um	46.871		Grid-30-500um	38.167
	Grid-30-500um	75.577		Grid-30-500um	64.686		Grid-30-500um	51.783		Grid-30-500um	47.06		Grid-30-500um	63.708		Grid-30-500um	57.355		Grid-30-500um	47.22		Grid-30-500um	37.938
	Grid-30-500um	76.79		Grid-30-500um	65.728		Grid-30-500um	52.086		Grid-30-500um	46.102		Grid-30-500um	63.035		Grid-30-500um	55.611		Grid-30-500um	46.718		Grid-30-500um	40.602
	Grid-30-500um	78.094		Grid-30-500um	65.305		Grid-30-500um	52.704		Grid-30-500um	46.026		Grid-30-500um	62.887		Grid-30-500um	55.649		Grid-30-500um	47.307		Grid-30-500um	40.72
	Grid-30-500um	74.916		Grid-30-500um	64.956		Grid-30-500um	52.377		Grid-30-500um	45.141		Grid-30-500um	63.231		Grid-30-500um	55.815		Grid-30-500um	46.677		Grid-30-500um	40.558
	Grid-30-500um	75.855		Grid-30-500um	64.501		Grid-30-500um	52.905		Grid-30-500um	46.306		Grid-30-500um	63.593		Grid-30-500um	56.469		Grid-30-500um	46.444		Grid-30-500um	40.843
	Grid-30-500um	76.268		Grid-30-500um	63.45		Grid-30-500um	53.533		Grid-30-500um	45.556		Grid-30-500um	62.46		Grid-30-500um	55.766		Grid-30-500um	46.755		Grid-30-500um	40.431
	Grid-30-500um	74.744		Grid-30-500um	63.601		Grid-30-500um	50.657		Grid-30-500um	44.909		Grid-30-500um	63.963		Grid-30-500um	55.569		Grid-30-500um	46.357		Grid-30-500um	40.453
	Grid-30-500um	76.331		Grid-30-500um	64.388		Grid-30-500um	51.811		Grid-30-500um	44.422		Grid-30-500um	64.403		Grid-30-500um	55.232		Grid-30-500um	44.824		Grid-30-500um	38.302
	Grid-30-500um	77.003		Grid-30-500um	64.851		Grid-30-500um	52.155		Grid-30-500um	42.829		Grid-30-500um	63.416		Grid-30-500um	56.089		Grid-30-500um	45.686		Grid-30-500um	37.927
	Grid-30-500um	77.028		Grid-30-500um	65.872		Grid-30-500um	53.162		Grid-30-500um	44.745		Grid-30-500um	64.287		Grid-30-500um	57.011		Grid-30-500um	45.079		Grid-30-500um	38.434
	Grid-30-500um	75.309		Grid-30-500um	65.187		Grid-30-500um	53.911		Grid-30-500um	43.599		Grid-30-500um	63.934		Grid-30-500um	57.374		Grid-30-500um	44.545		Grid-30-500um	38.352
	Grid-30-500um	74.934		Grid-30-500um	64.035		Grid-30-500um	53.812		Grid-30-500um	44.168		Grid-30-500um	63.924		Grid-30-500um	57.13		Grid-30-500um	45.343		Grid-30-500um	42.298
	Grid-30-500um	74.151		Grid-30-500um	65.56		Grid-30-500um	50.995		Grid-30-500um	45.357		Grid-30-500um	62.746		Grid-30-500um	57.547		Grid-30-500um	46.13		Grid-30-500um	37.95
	Grid-30-500um	78.02		Grid-30-500um	64.497		Grid-30-500um	53.615		Grid-30-500um	43.184		Grid-30-500um	62.389		Grid-30-500um	57.138		Grid-30-500um	44.217		Grid-30-500um	38.012
	Grid-30-500um	74.386		Grid-30-500um	64.435		Grid-30-500um	55.221		Grid-30-500um	43.846		Grid-30-500um	62.907		Grid-30-500um	55.709		Grid-30-500um	44.228		Grid-30-500um	38.17
	Grid-30-500um	74.983		Grid-30-500um	64.331		Grid-30-500um	58.115		Grid-30-500um	44.416		Grid-30-500um	63.388		Grid-30-500um	55.553		Grid-30-500um	46.421		Grid-30-500um	38.49
	Grid-30-500um	75.598		Grid-30-500um	64.277		Grid-30-500um	50.113		Grid-30-500um	40.803		Grid-30-500um	63.742		Grid-30-500um	56.02		Grid-30-500um	46.844		Grid-30-500um	38.959
	Grid-30-500um	76.385		Grid-30-500um	63.769		Grid-30-500um	52.117		Grid-30-500um	42.33		Grid-30-500um	63.447		Grid-30-500um	55.876		Grid-30-500um	46.838		Grid-30-500um	37.96
	Grid-30-500um	74.325		Grid-30-500um	64.966		Grid-30-500um	51.502		Grid-30-500um	42.499		Grid-30-500um	63.301		Grid-30-500um	56.37		Grid-30-500um	46.679		Grid-30-500um	39.571
	Grid-30-500um	75.834		Grid-30-500um	63.912		Grid-30-500um	50.064		Grid-30-500um	42.851		Grid-30-500um	63.445		Grid-30-500um	55.196		Grid-30-500um	46.439		Grid-30-500um	38.173
	Grid-30-200um	89.302		Grid-30-200um	84.007		Grid-30-200um	58.208		Grid-30-200um	55.911		Grid-30-200um	80.525		Grid-30-200um	74.214		Grid-30-200um	55.079		Grid-30-200um	44.924
	Grid-30-200um	88.739		Grid-30-200um	82.299		Grid-30-200um	55.123		Grid-30-200um	49.328		Grid-30-200um	80.077		Grid-30-200um	74.784		Grid-30-200um	54.508		Grid-30-200um	45.767
	Grid-30-200um	92.132		Grid-30-200um	82.181		Grid-30-200um	55.517		Grid-30-200um	54.361		Grid-30-200um	79.239		Grid-30-200um	74.329		Grid-30-200um	55.261		Grid-30-200um	44.69
	Grid-30-200um	88.768		Grid-30-200um	81.998		Grid-30-200um	59.872		Grid-30-200um	53.49		Grid-30-200um	80.009		Grid-30-200um	73.346		Grid-30-200um	54.867		Grid-30-200um	46.408
	Grid-30-200um	89.493		Grid-30-200um	80.163		Grid-30-200um	55.719		Grid-30-200um	53.126		Grid-30-200um	80.021		Grid-30-200um	73.646		Grid-30-200um	54.068		Grid-30-200um	45.487
	Grid-30-200um	89.721		Grid-30-200um	84.302		Grid-30-200um	57.935		Grid-30-200um	56.186		Grid-30-200um	79.762		Grid-30-200um	73.998		Grid-30-200um	55.558		Grid-30-200um	44.845
	Grid-30-200um	90.793		Grid-30-200um	82.371		Grid-30-200um	53.056		Grid-30-200um	55.657		Grid-30-200um	80.755		Grid-30-200um	74.663		Grid-30-200um	55.667		Grid-30-200um	45.364
	Grid-30-200um	91.121		Grid-30-200um	85.54		Grid-30-200um	57.111		Grid-30-200um	48.399		Grid-30-200um	80.62		Grid-30-200um	73.74		Grid-30-200um	56.919		Grid-30-200um	44.818
	Grid-30-200um	91.294		Grid-30-200um	82.888		Grid-30-200um	56.156		Grid-30-200um	48.787		Grid-30-200um	79.253		Grid-30-200um	73.695		Grid-30-200um	56.144		Grid-30-200um	46.95
	Grid-30-200um	90.538		Grid-30-200um	81.315		Grid-30-200um	60.591		Grid-30-200um	50.855		Grid-30-200um	80.396		Grid-30-200um	74.807		Grid-30-200um	56.34		Grid-30-200um	44.188
	Grid-30-200um	91.764		Grid-30-200um	82.389		Grid-30-200um	56.925		Grid-30-200um	58.997		Grid-30-200um	79.25		Grid-30-200um	74.498		Grid-30-200um	54.401		Grid-30-200um	44.685
	Grid-30-200um	91.733		Grid-30-200um	83.225		Grid-30-200um	55.586		Grid-30-200um	54.417		Grid-30-200um	80.651		Grid-30-200um	75.765		Grid-30-200um	56.145		Grid-30-200um	48.29
	Grid-30-200um	90.324		Grid-30-200um	82.044		Grid-30-200um	54.555		Grid-30-200um	55.595		Grid-30-200um	80.548		Grid-30-200um	74.641		Grid-30-200um	56.999		Grid-30-200um	45.011
	Grid-30-200um	92.524		Grid-30-200um	81.791		Grid-30-200um	57.432		Grid-30-200um	53.232		Grid-30-200um	79.145		Grid-30-200um	74.875		Grid-30-200um	56.281		Grid-30-200um	46.643
	Grid-30-200um	91.713		Grid-30-200um	81.008		Grid-30-200um	53.077		Grid-30-200um	53.291		Grid-30-200um	80.335		Grid-30-200um	75.312		Grid-30-200um	55.635		Grid-30-200um	46.437
	Grid-30-200um	91.955		Grid-30-200um	81.426		Grid-30-200um	56.648		Grid-30-200um	55.574		Grid-30-200um	79.458		Grid-30-200um	75.533		Grid-30-200um	54.186		Grid-30-200um	46.094
	Grid-30-200um	91.277		Grid-30-200um	80.246		Grid-30-200um	55.471		Grid-30-200um	56.961		Grid-30-200um	80.548		Grid-30-200um	74.953		Grid-30-200um	55.906		Grid-30-200um	46.68
	Grid-30-200um	93.17		Grid-30-200um	83.463		Grid-30-200um	56.697		Grid-30-200um	55.556		Grid-30-200um	80.731		Grid-30-200um	75.419		Grid-30-200um	55.352		Grid-30-200um	45.836
	Grid-30-200um	90.996		Grid-30-200um	80.606		Grid-30-200um	55.545		Grid-30-200um	55.755		Grid-30-200um	79.578		Grid-30-200um	74.711		Grid-30-200um	55.455		Grid-30-200um	45.246
	Grid-30-200um	89.679		Grid-30-200um	84.034		Grid-30-200um	59.469		Grid-30-200um	54.08		Grid-30-200um	80.949		Grid-30-200um	73.654		Grid-30-200um	54.018		Grid-30-200um	49.581
	Grid-30-200um	89.452		Grid-30-200um	83.452		Grid-30-200um	55.961		Grid-30-200um	55.919		Grid-30-200um	79.774		Grid-30-200um	73.457		Grid-30-200um	54.31		Grid-30-200um	44.628
	Grid-30-200um	90.976		Grid-30-200um	85.524		Grid-30-200um	55.042		Grid-30-200um	54.15		Grid-30-200um	79.607		Grid-30-200um	74.491		Grid-30-200um	54.049		Grid-30-200um	47.975
	Grid-30-200um	90.32		Grid-30-200um	85.953		Grid-30-200um	55.479		Grid-30-200um	49.992		Grid-30-200um	79.858		Grid-30-200um	75.52		Grid-30-200um	55.744		Grid-30-200um	44.323
	Grid-30-200um	88.98		Grid-30-200um	86.625		Grid-30-200um	55.537		Grid-30-200um	55.993		Grid-30-200um	80.641		Grid-30-200um	74.528		Grid-30-200um	55.695		Grid-30-200um	45.943
	Grid-30-200um	90.448		Grid-30-200um	83.502		Grid-30-200um	54.433		Grid-30-200um	49.103		Grid-30-200um	79.874		Grid-30-200um	75.737		Grid-30-200um	54.741		Grid-30-200um	48.747

## Sheet: AvgStandard DLC-Grid30
	StdDLC-MBlade-Black60-WhPET-Grid20			StdDLC-MBlade-Black60-ClrPET-Grid20			StdDLC-MBlade-ECI7007-WhPET-Grid20			StdDLC-MBlade-ECI7007-ClrPET-Grid20			StdDLC-PBlade-Black60-WhPET-Grid20			StdDLC-PBlade-Black60-ClrPET-Grid20			StdDLC-PBlade-ECI7007-WhPET-Grid20			StdDLC-PBlade-ECI7007-ClrPET-Grid20
	Design	Line Width (µm)		Design	Line Width (µm)		Design	Line Width (µm)		Design	Line Width (µm)		Design	Line Width (µm)		Design	Line Width (µm)		Design	Line Width (µm)		Design	Line Width (µm)
	STDDLC-MBlade-Black60 - Grid-30-1000um	73.4556		STDDLC-MBlade-Black60 - Grid-30-1000um	62.0875		STDDLC-MBlade-ECI7007 - Grid-30-1000um	50.0813		STDDLC-MBlade-ECI7007 - Grid-30-1000um	40.708		StdDLC-PBlade-Black60 - Grid-20-1000um	59.345		StdDLC-PBlade-Black60 - Grid-20-1000um	48.001		StdDLC-PBlade-ECI7007-Grid-30-1000um	41.8886		StdDLC-PBlade-ECI7007-Grid-30-1000um	35.6233
	STDDLC-MBlade-Black60 - Grid-30-500um	76.029		STDDLC-MBlade-Black60 - Grid-30-500um	64.5971		STDDLC-MBlade-ECI7007 - Grid-30-500um	52.4966		STDDLC-MBlade-ECI7007 - Grid-30-500um	44.8373		StdDLC-PBlade-Black60 - Grid-20-500um	63.5308		StdDLC-PBlade-Black60 - Grid-20-500um	56.1348		StdDLC-PBlade-ECI7007-Grid-30-500um	45.9192		StdDLC-PBlade-ECI7007-Grid-30-500um	39.1699
	STDDLC-MBlade-Black60 - Grid-30-200um	90.6885		STDDLC-MBlade-Black60 - Grid-30-200um	82.8941		STDDLC-MBlade-ECI7007 - Grid-30-200um	56.2858		STDDLC-MBlade-ECI7007 - Grid-30-200um	53.7886		StdDLC-PBlade-Black60 - Grid-20-200um	80.0642		StdDLC-PBlade-Black60 - Grid-20-200um	74.5726		StdDLC-PBlade-ECI7007-Grid-30-200um	55.3331		StdDLC-PBlade-ECI7007-Grid-30-200um	45.9824

[truncated: 1 more sheets: TransparencyLstar]
