# Supplementary material for: DLC-engineered flat gravure surface: enabling sustainable fabrication to replace chrome for printing conductive line electrodes in flexible electronics
Source: Royal Society of Chemistry journal article supplement (doi:10.1039/d4ma00562g), 2024-01-01
Supplement: d4ma00562g2.pdf [file d4ma00562g2.pdf]

## Supplemental Information for “DLC-Engineered Flat Gravure Surface: Enabling Sustainable Fabrication to Replace chrome for Printing Conductive Line Electrodes in Flexible Electronics”

Chandramohan Seetharamiahsrinivasaraju<sup>1\*</sup>, Ronit Shetty<sup>2</sup>, Donald K. Cohen<sup>3</sup>, Priyanka Sharma<sup>1\*</sup>, and James R. Springstead<sup>1</sup>

<sup>1</sup>Department of Chemical and Paper Engineering, Western Michigan University Kalamazoo, Michigan, 49008, USA

<sup>2</sup>Industrial & Entrepreneurial Engineering (IEE), Western Michigan University Kalamazoo, Michigan, 49008, USA

<sup>3</sup>Michigan Metrology, Livonia, Michigan 48152, USA, <sup>4</sup>Graphic Communication, Cal Poly, San Luis Obispo, CA 93407

Supporting Information content

Number of Pages 40 (S1 to S40)

Figure S-1 to S-2: Bruker Images of chrome and standard DLC Surface.

Figure S-3 and S-4: Contact Angle and Surface Free Energy measured on chrome and standard DLC surface.

Figure S-5 and S-6: Contact Angle and Surface Free Energy measured on Clear PET and White PET plastic surface.

Figure S-7 and S-8: Surface Tension (ST) of ECI 7007 and Black 60 ink.

Figure S-9 and S-12: Contact Angle of ECI 7007 ink and Black 60 ink on Clear PET and White PET plastic surface.

Figure S-13 and S-16: Contact Angle of Black 60 ink and ECI 7007 ink on chrome and standard DLC surface.

Figure S-17 to S-32: Images of printed samples obtained in Trial T1 to T8 Print Experiment- for 20  $\mu\text{m}$  and 30  $\mu\text{m}$  grid.

Figure S-33: Residual plots for Line Width from Minitab.

Table S-1 Surface Metrology 3D parameter filter tools,

Table S-2 to S-4: Statistical Comparisons for 20  $\mu\text{m}$  and 30  $\mu\text{m}$  grid, ANOVA results.

\*Corresponding authors,

Email: [priyanka.sharma@wmich.edu](mailto:priyanka.sharma@wmich.edu), Phone: (269) 276-3506

Email: [cnv8204@wmich.edu](mailto:cnv8204@wmich.edu), Phone: (201) 6945126

| Trial No. | Experiment Name              | Print Conditions |          |                | Reference Figure     |
|-----------|------------------------------|------------------|----------|----------------|----------------------|
|           |                              | Blade Type       | Ink Type | Substrate Type |                      |
| T1        | Trial One Print Experiment   | Metal            | Black60  | White PET      | Figure S-17 and S-18 |
| T2        | Trial Two Print Experiment   | Metal            | Black60  | Clear PET      | Figure S-19 and S-20 |
| T3        | Trial Three Print Experiment | Metal            | ECI7007  | White PET      | Figure S-21 and S-22 |
| T4        | Trial Four Print Experiment  | Metal            | ECI7007  | Clear PET      | Figure S-23 and S-24 |
| T5        | Trial Five Print Experiment  | Plastic          | Black60  | White PET      | Figure S-25 and S-26 |
| T6        | Trial Six Print Experiment   | Plastic          | Black60  | Clear PET      | Figure S-27 and S-28 |
| T7        | Trial Seven Print Experiment | Plastic          | ECI7007  | White PET      | Figure S-29 and S-30 |
| T8        | Trial Eight Print Experiment | Plastic          | ECI7007  | Clear PET      | Figure S-31 and S-32 |

**Figure S-1.** Bruker Images of chrome Surface.....5

**Figure S-2.** Bruker Images of standard DLC Surface. ....6

**Figure S-3.** Contact Angle and Surface Free Energy measured on chrome Surface using the KRÜSS MSA (Mobile Surface Analyzer).....7

**Figure S-4.** Contact Angle and Surface Free Energy measured on standard DLC surface using the KRÜSS MSA (Mobile Surface Analyzer).....8

**Figure S-5.** Contact Angle and Surface Free Energy measured on Clear PET plastic surface using the KRÜSS MSA (Mobile Surface Analyzer).....9

**Figure S-6.** Contact Angle and Surface Free Energy measured on White PET plastic surface using the KRÜSS MSA (Mobile Surface Analyzer).....10

**Figure S-7.** Surface Tension (ST) of ECI 7007 ink.....11

**Figure S-8.** Surface Tension (ST) of Black 60 ink .....12

**Figure S-9.** Contact Angle of Black 60 ink on White PET .....13

**Figure S-10.** Contact Angle of Black 60 ink on Clear PET .....14

**Figure S-11.** Contact Angle of ECI 7007 ink on White PET .....15

**Figure S-12.** Contact Angle of ECI 7007 ink on Clear PET .....16

**Figure S-13.** Contact Angle of Black 60 ink on chrome surface. ....17

**Figure S-14.** Contact Angle of Black 60 ink on standard DLC surface.....18

**Figure S-15.** Contact Angle of ECI 7007 ink on chrome surface. ....19

**Figure S-16.** Contact Angle of ECI 7007 ink on standard DLC surface.....20

**Figure S-17.** Trial One Print Experiment- 20 µm Grid .....21

**Figure S-18.** Trial One Print Experiment- 30 µm Grid .....22

**Figure S-19.** Trial Two Print Experiment - 20 µm Grid .....23

**Figure S-20.** Trial Two Print Experiment - 30 µm Grid .....24

**Figure S-21.** Trial Three Print Experiment - 20 µm Grid .....25

**Figure S-22.** Trial Three Print Experiment - 30 µm Grid .....26

**Figure S-23.** Trial Four Print Experiment - 20 µm Grid .....27

**Figure S-24.** Trial Four Print Experiment - 30 µm Grid .....28

**Figure S-25.** Trial Five Print Experiment - 20 µm Grid .....29

**Figure S-26.** Trial Five Print Experiment - 30 µm Grid .....30

|                                                                                                                                                       |    |
|-------------------------------------------------------------------------------------------------------------------------------------------------------|----|
| <b>Figure S-27.</b> Trial Six Print Experiment - 20 $\mu\text{m}$ Grid .....                                                                          | 31 |
| <b>Figure S-28.</b> Trial Six Print Experiment - 30 $\mu\text{m}$ Grid .....                                                                          | 32 |
| <b>Figure S-29.</b> Trial Seven Print Experiment - 20 $\mu\text{m}$ Grid .....                                                                        | 33 |
| <b>Figure S-30.</b> Trial Seven Print Experiment - 30 $\mu\text{m}$ Grid .....                                                                        | 34 |
| <b>Figure S-31.</b> Trial Eight Print Experiment - 20 $\mu\text{m}$ Grid .....                                                                        | 35 |
| <b>Figure S-32.</b> Trial Eight Print Experiment - 30 $\mu\text{m}$ Grid .....                                                                        | 36 |
| <b>Figure S-33.</b> Residual plots for Line Width from Minitab. Results suggest acceptable normality, equity of variance and randomness of data. .... | 39 |
| <br>                                                                                                                                                  |    |
| <b>Table S-1.</b> Names of 3D parameter filter tools used as Analyzer algorithm in Vision 64 .....                                                    | 4  |
| <b>Table S-2.</b> Statistical Comparisons of 20 $\mu\text{m}$ Grids.....                                                                              | 37 |
| <b>Table S-3.</b> Statistical Comparisons of 30 $\mu\text{m}$ Grids.....                                                                              | 38 |
| <b>Table S-4.</b> Analysis of variance in Minitab .....                                                                                               | 40 |

| 3D parameter filter tools:                          | Parameter symbol and its parameter name given in parenthesis:                                                                                                  | Description:                                                                                                                                                                                                                                                                                                                           |
|-----------------------------------------------------|----------------------------------------------------------------------------------------------------------------------------------------------------------------|----------------------------------------------------------------------------------------------------------------------------------------------------------------------------------------------------------------------------------------------------------------------------------------------------------------------------------------|
| S Parameters-Height                                 | S <sub>a</sub> (average roughness in nm)<br>S <sub>q</sub> (average root mean square roughness in nm)<br>S <sub>z</sub> (maximum height of the surface in nm). | The S <sub>a</sub> and S <sub>q</sub> parameters represent an overall measure of the texture comprising the surface, while S <sub>z</sub> represents the the maximum height of the surface.                                                                                                                                            |
| S Parameter-Hybrid tool                             | S <sub>dq</sub> (average root mean square slope in degree)<br>S <sub>dr</sub> (developed interfacial area ratio)                                               | S <sub>dq</sub> is the root mean square (RMS) surface slope comprising the surface, evaluated over all directions. S <sub>dr</sub> is the developed interfacial area ratio expressed as the percentage of the additional surface area contributed by the texture compared to an ideal plane that is the size of the measurement region |
| Rz Analysis (Legacy parameter & not a 3D parameter) | Rz (average roughness)                                                                                                                                         | Used for capturing the average of the 10 highest to 10 lowest points perpendicular to the surface                                                                                                                                                                                                                                      |

**Table S-1.** Names of 3D parameter filter tools used as Analyzer algorithm in Vision 64 software to evaluate the OPDx file that has 3D surface data of the plain portion of chrome and standard DLC layers

Bruker Images of Chrome Surface

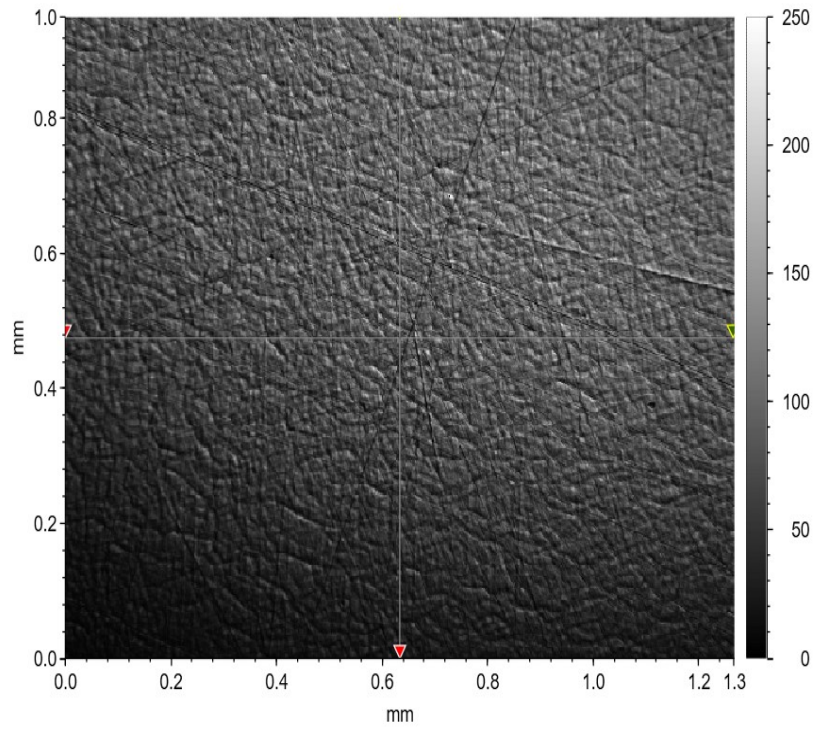

Gray Scale Image

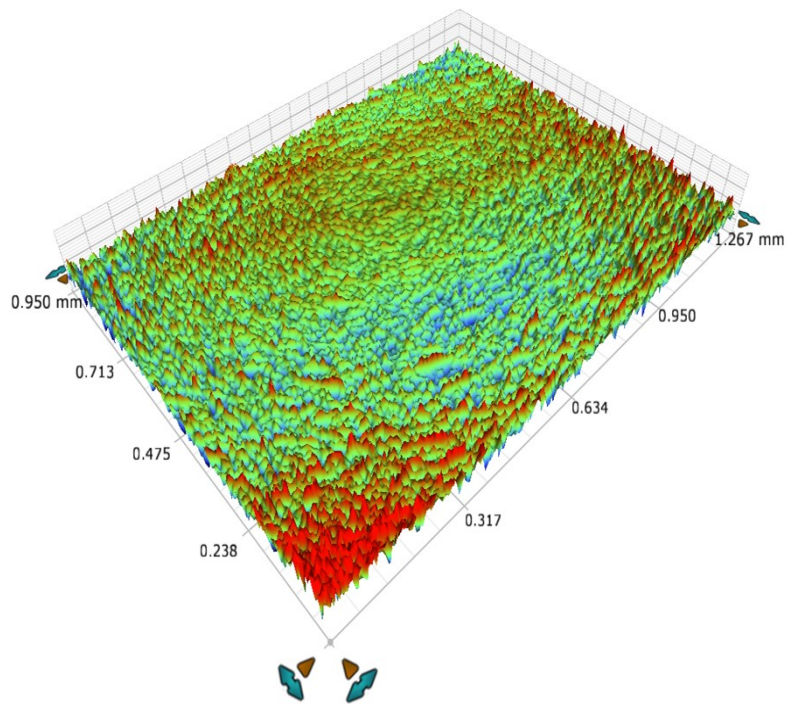

3D Contour Color Plot

**Figure S-1.** Bruker Images of chrome Surface. (A) Gray Scale Image and (B) 3D Contour Color Plot.

### Bruker Images of Standard DLC Surface

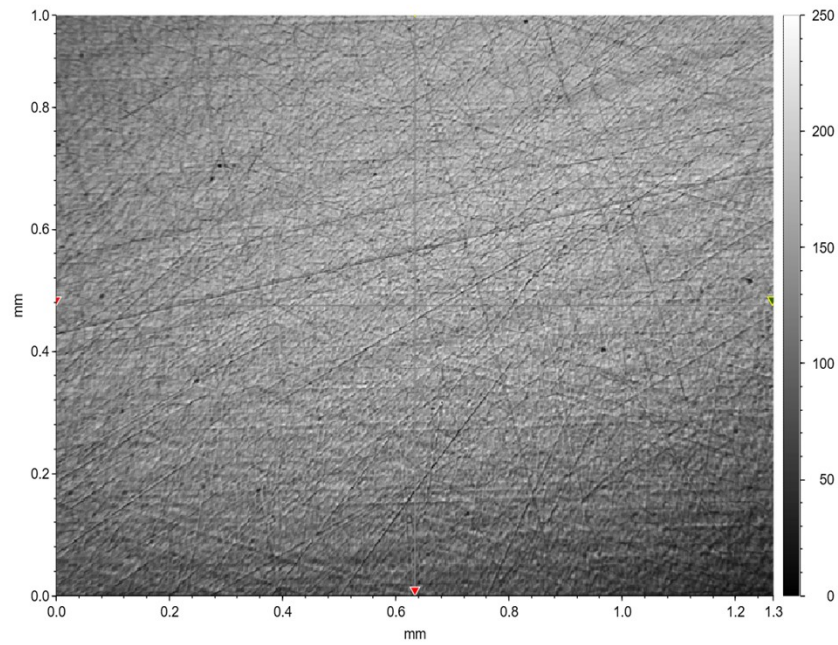

(A) Gray Scale Image

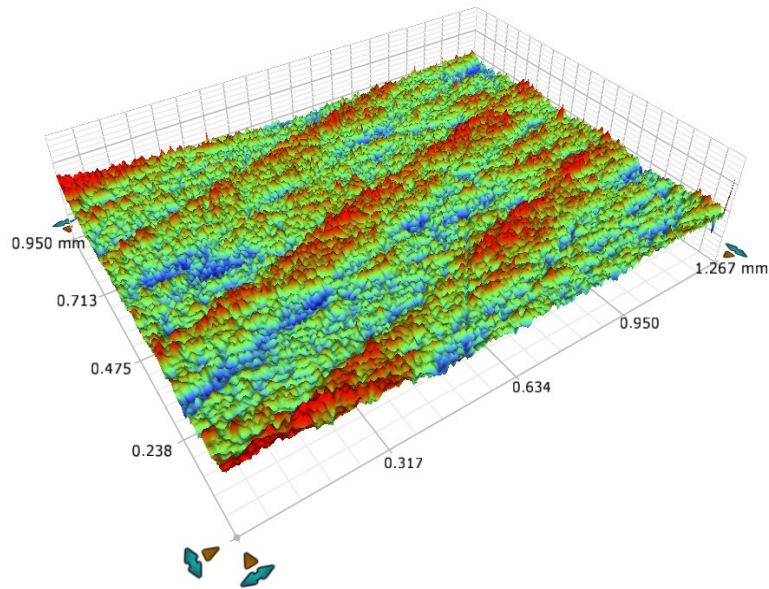

(B) 3D Contour Color Plot

**Figure S-2.** Bruker Images of standard DLC Surface. (A) Gray Scale Image and (B) 3D Contour Color Plot.

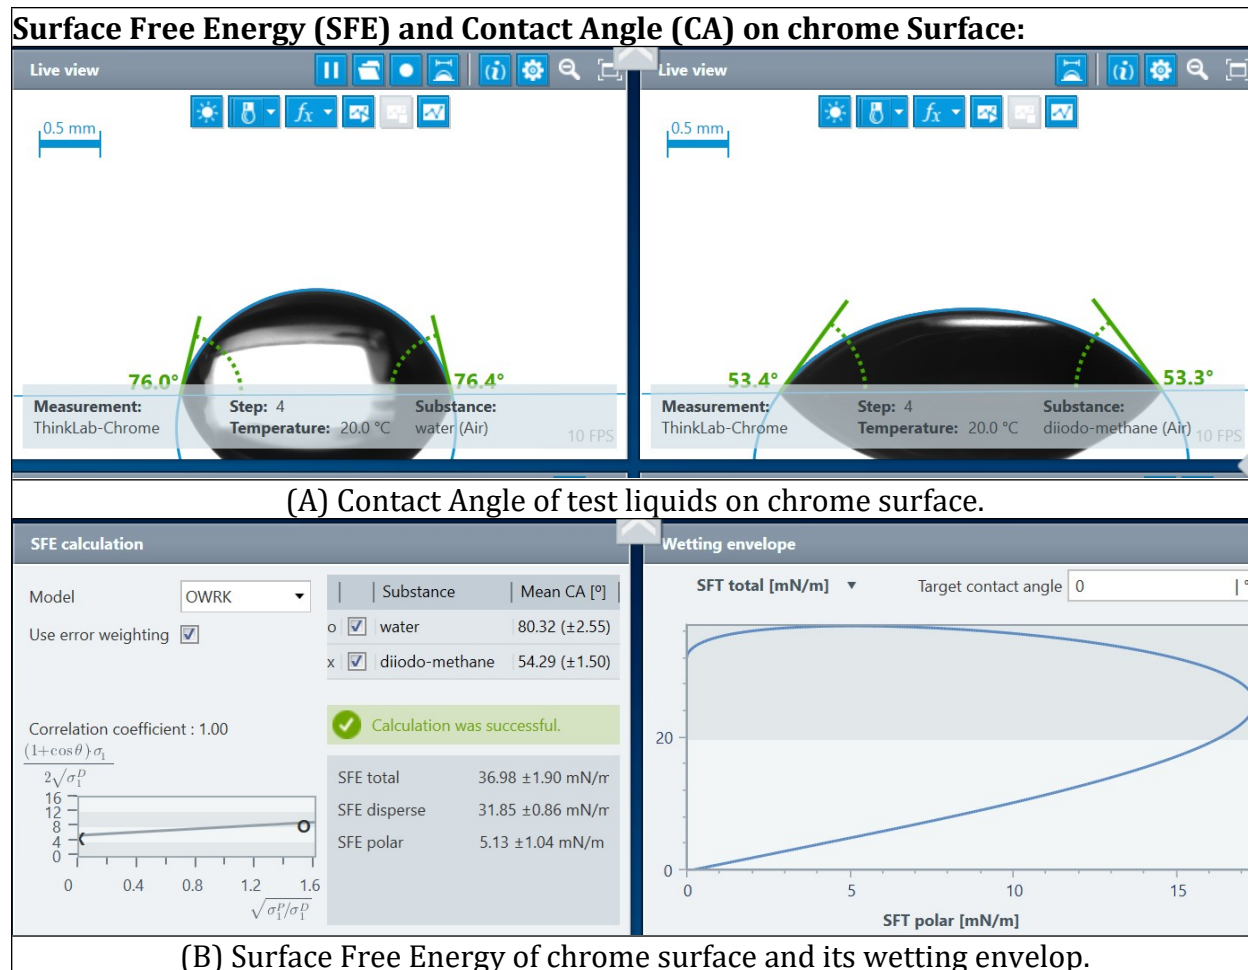

**Figure S-3.** Contact Angle and Surface Free Energy measured on chrome Surface using the KRÜSS MSA (Mobile Surface Analyzer). (A) Contact Angle of test liquids, water and diiodo-methane on chrome surface. (B) Surface Free Energy calculation (SFE total, SFE disperse and SFE polar) using Owens, Wendt, Rabel and Kaelble (OWRK) method along with wetting envelop plot.

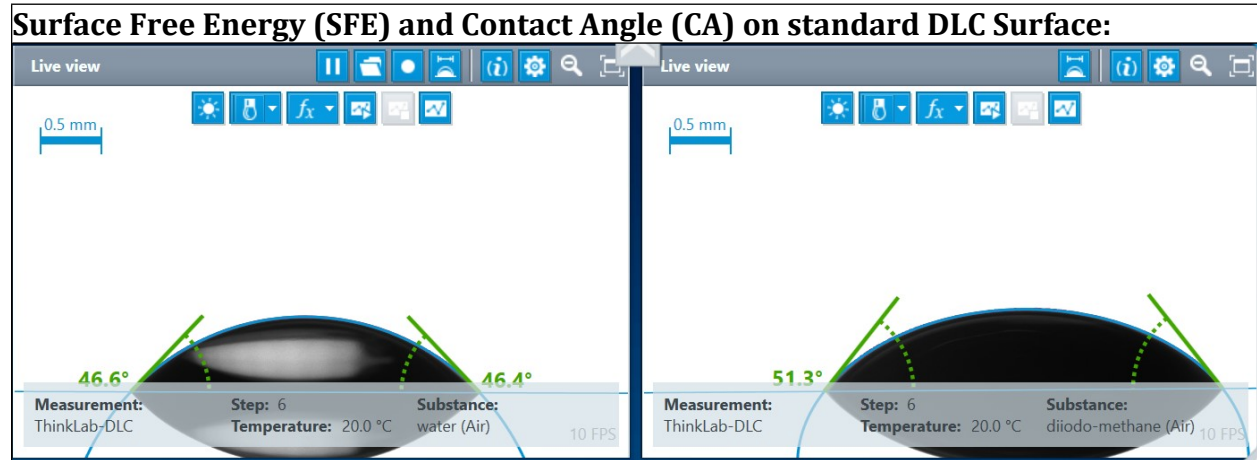

(A) Contact Angle of test liquids on standard DLC surface.

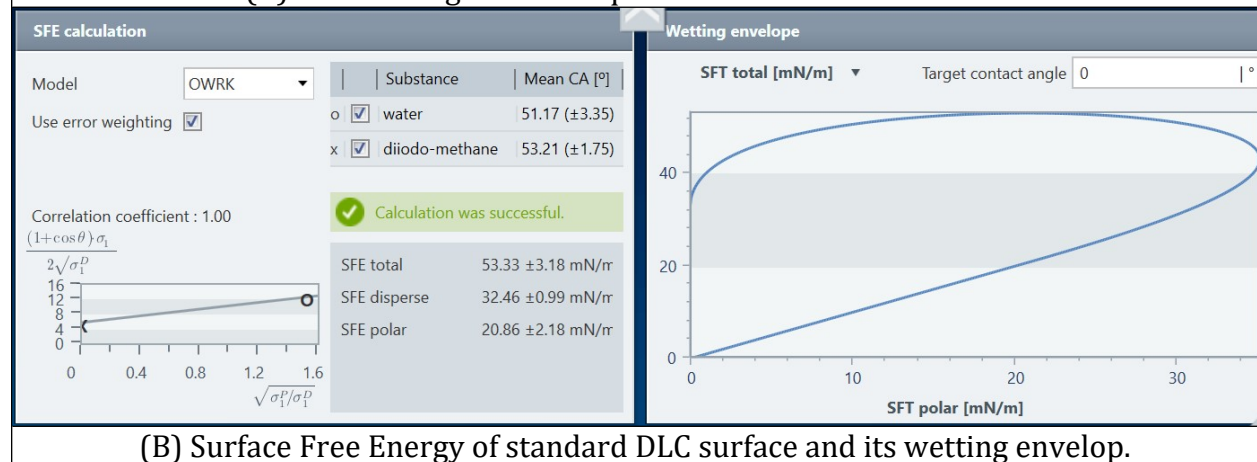

(B) Surface Free Energy of standard DLC surface and its wetting envelop.

**Figure S-4.** Contact Angle and Surface Free Energy measured on standard DLC surface using the KRÜSS MSA (Mobile Surface Analyzer). (A) Contact Angle of test liquids, water and diiodo-methane on standard DLC surface. (B) Surface Free Energy calculation (SFE total, SFE disperse and SFE polar) using Owens, Wendt, Rabel and Kaelble (OWRK) method along with wetting envelop plot.



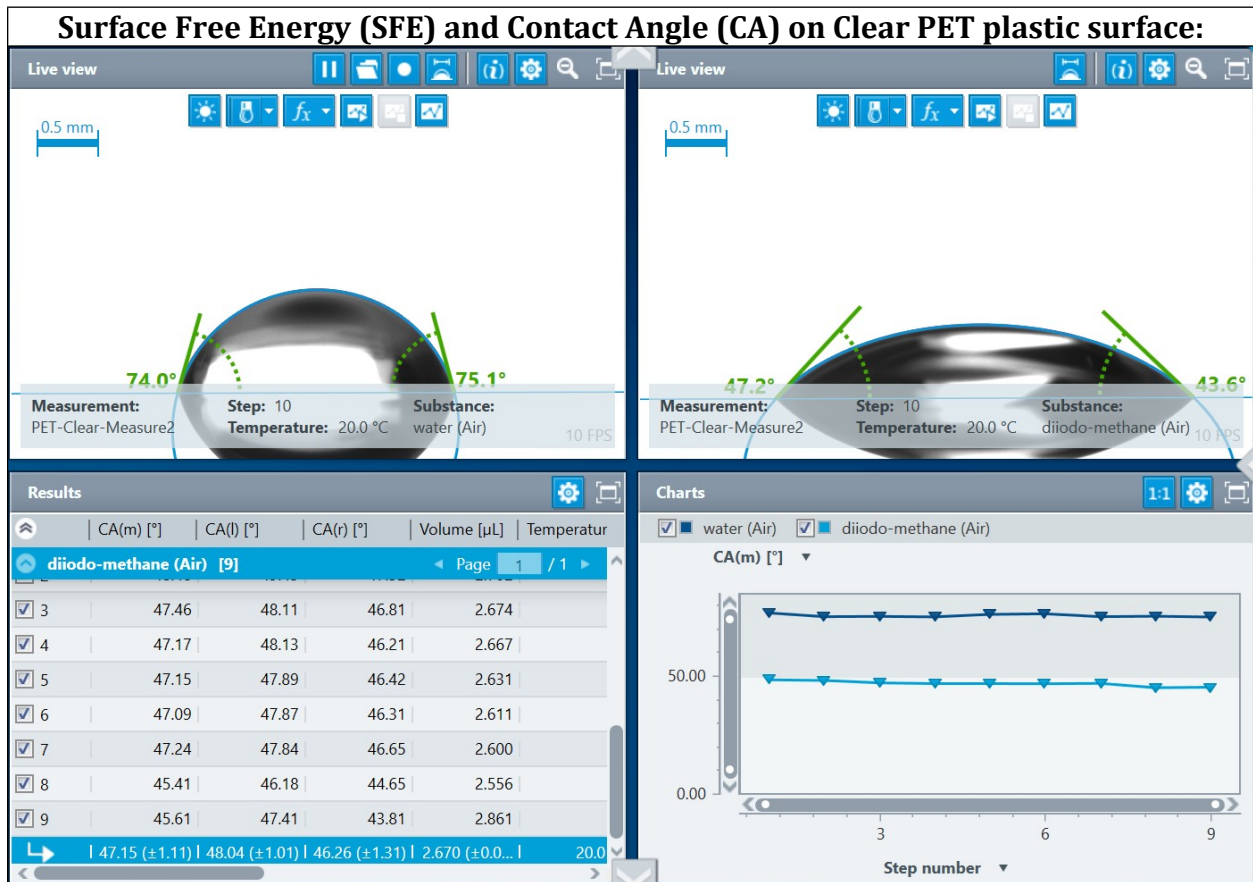

(A) Contact Angle of test liquids on Clear PET plastic surface.

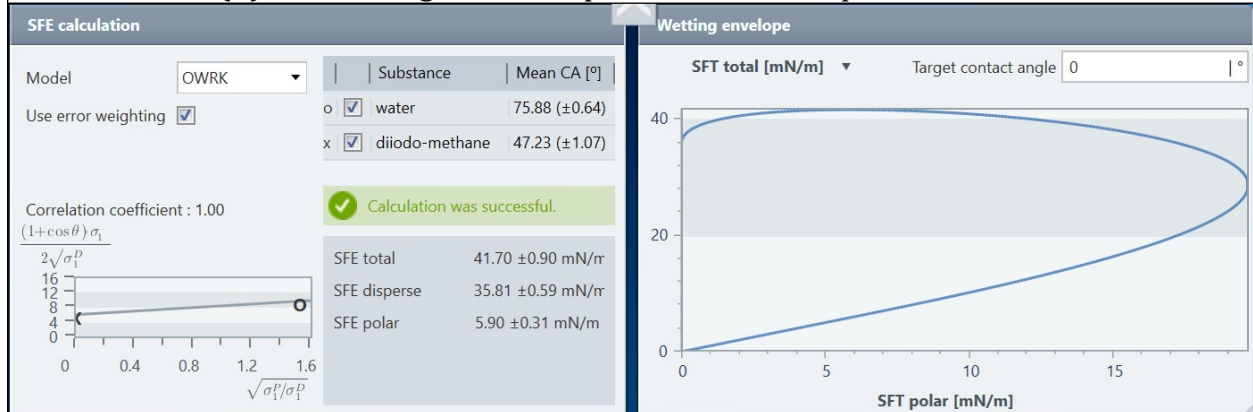

(B) Surface Free Energy of Clear PET plastic surface and its wetting envelop.

**Figure S-5.** Contact Angle and Surface Free Energy measured on Clear PET plastic surface using the KRÜSS MSA (Mobile Surface Analyzer). (A) Contact Angle of test liquids, water and diiodo-methane on Clear PET plastic surface. (B) Surface Free Energy calculation (SFE total, SFE disperse and SFE polar) using Owens, Wendt, Rabel and Kaelble (OWRK) method along with wetting envelop plot.

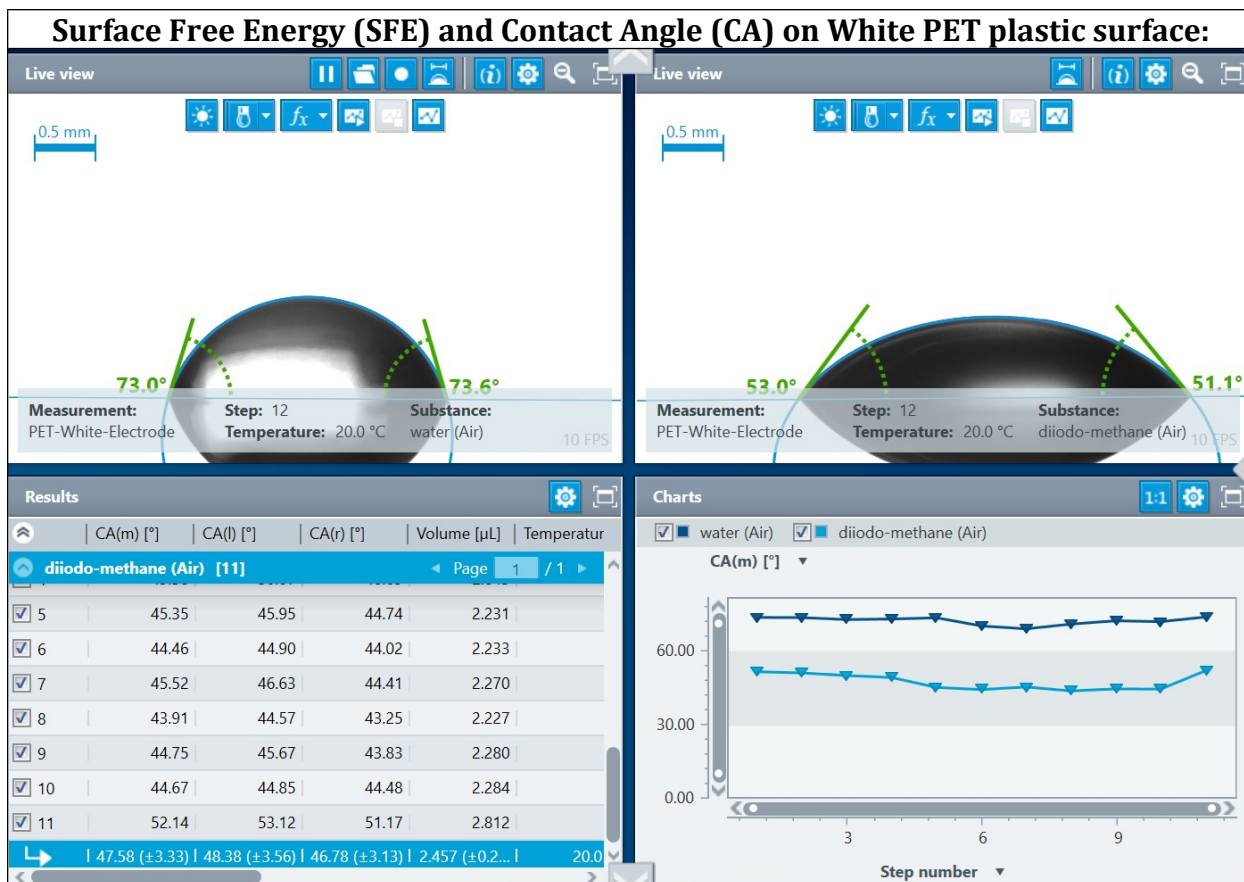

(A) Contact Angle of test liquids on White PET plastic surface.

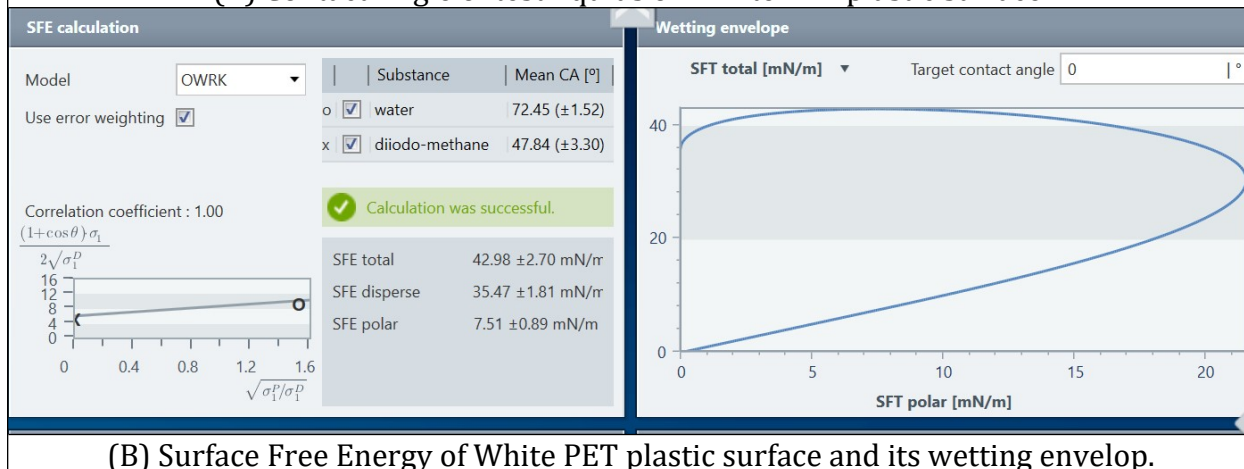

(B) Surface Free Energy of White PET plastic surface and its wetting envelop.

**Figure S-6.** Contact Angle and Surface Free Energy measured on White PET plastic surface using the KRÜSS MSA (Mobile Surface Analyzer). (A) Contact Angle of test liquids, water and diiodo-methane on White PET plastic surface. (B) Surface Free Energy calculation (SFE total, SFE disperse and SFE polar) using Owens, Wendt, Rabel and Kaelble (OWRK) method along with wetting envelop plot.

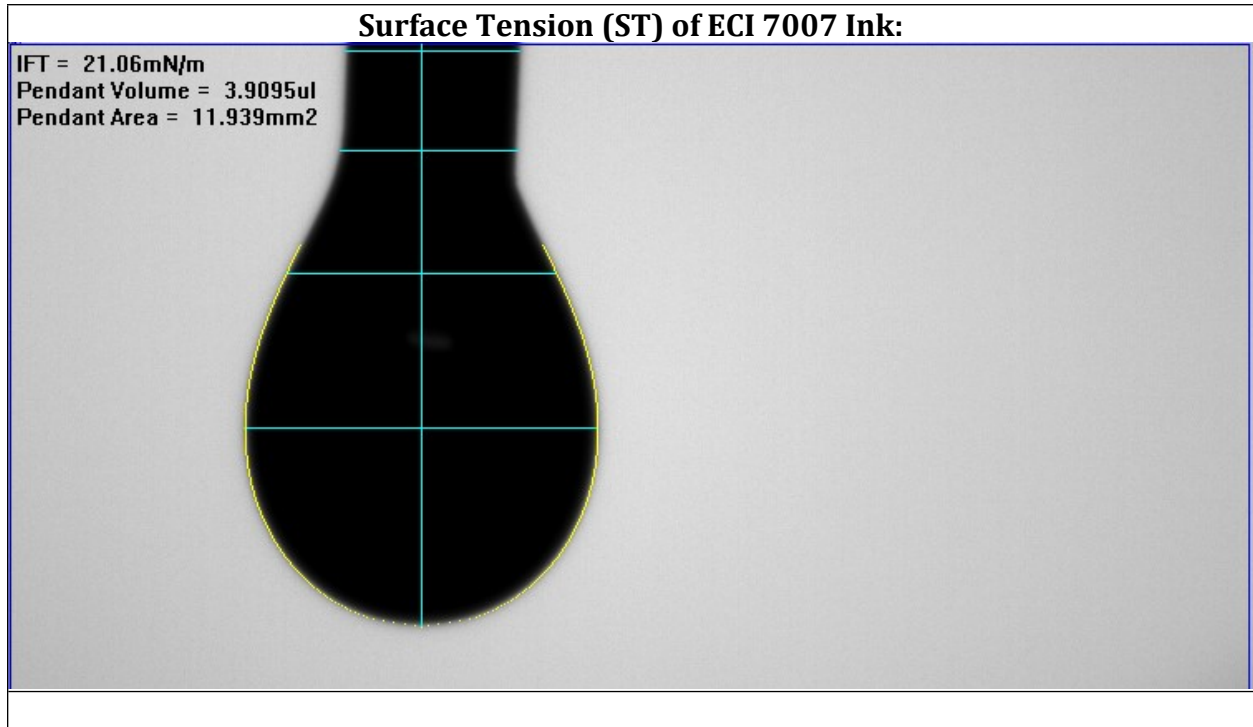

**Figure S-7.** Surface Tension (ST) of ECI 7007 ink measured with the instrument First Ten Angstroms FTA200 using Pendant Drop Method.

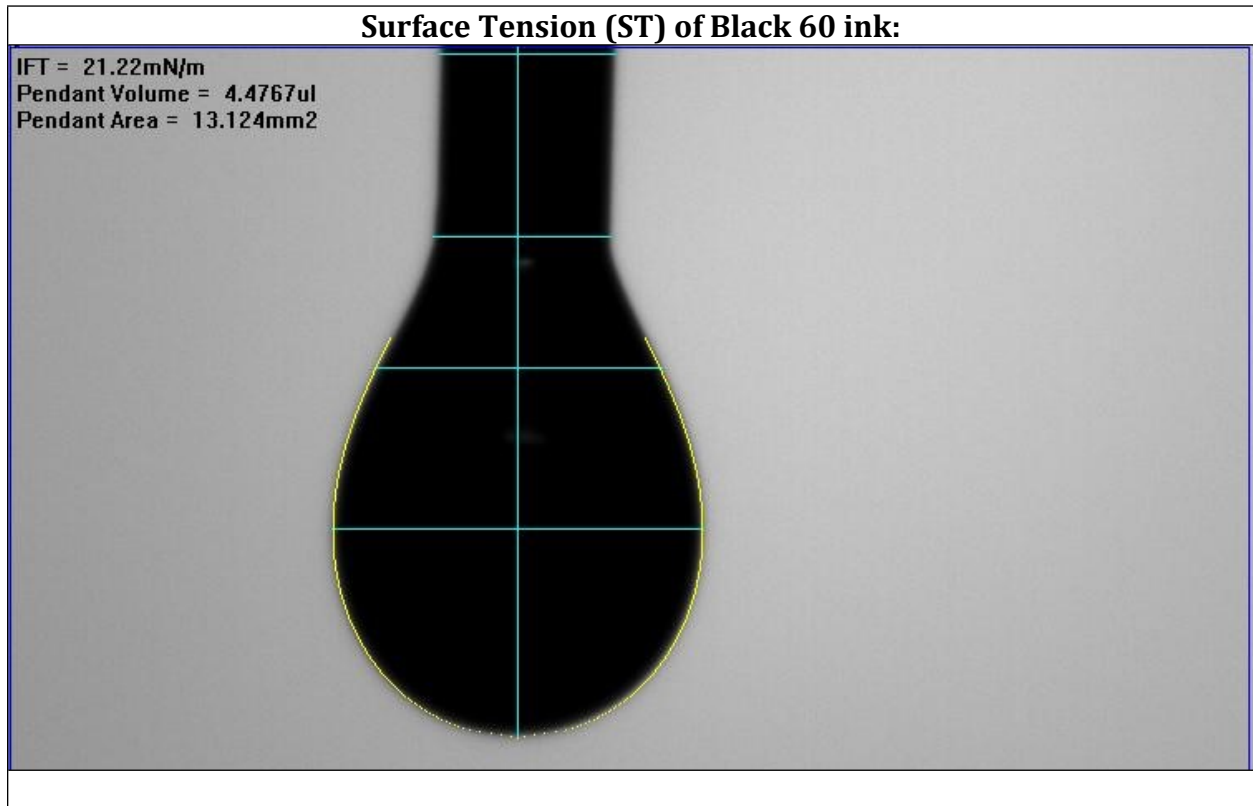

**Figure S-8.** Surface Tension (ST) of Black 60 ink measured with the instrument First Ten Angstroms FTA200 using Pendant Drop Method.

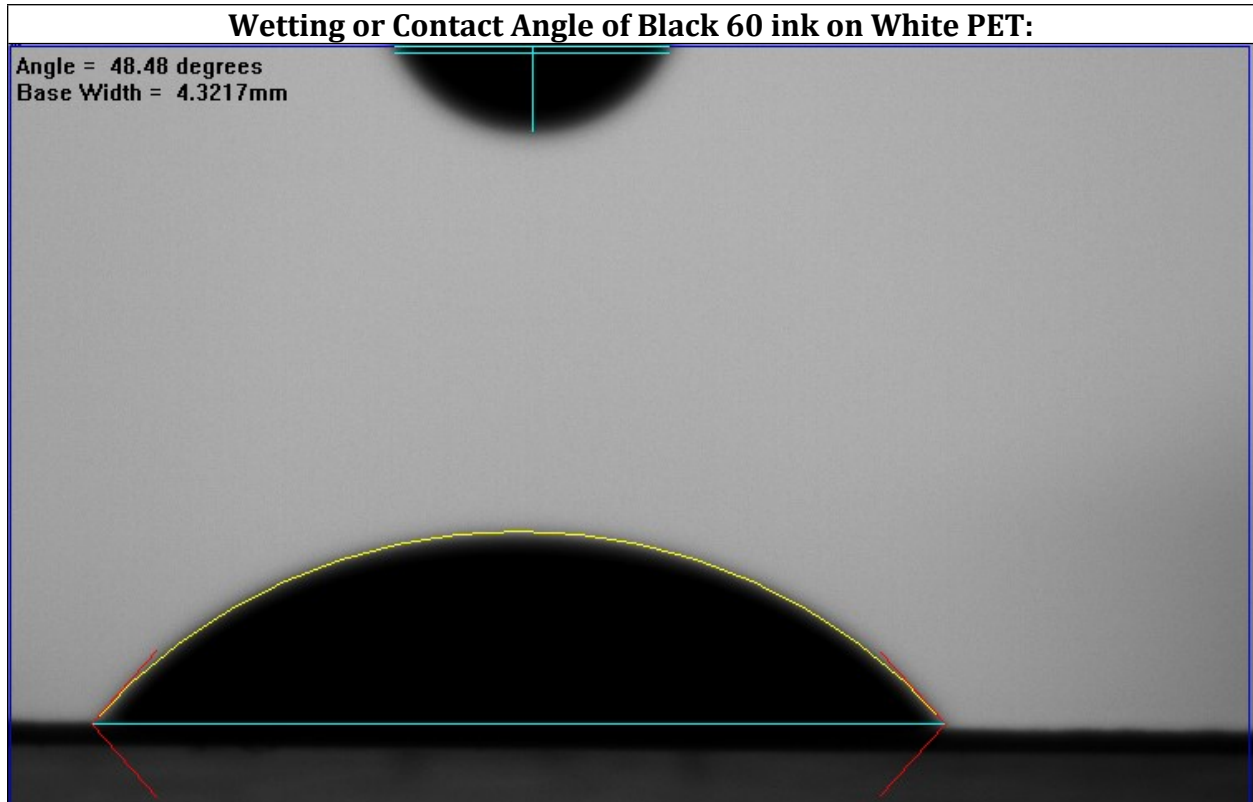

**Figure S-9.** Contact Angle of Black 60 ink on White PET plastic surface. Measured with the instrument First Ten Angstroms FTA200 using Sessile Drop Method.

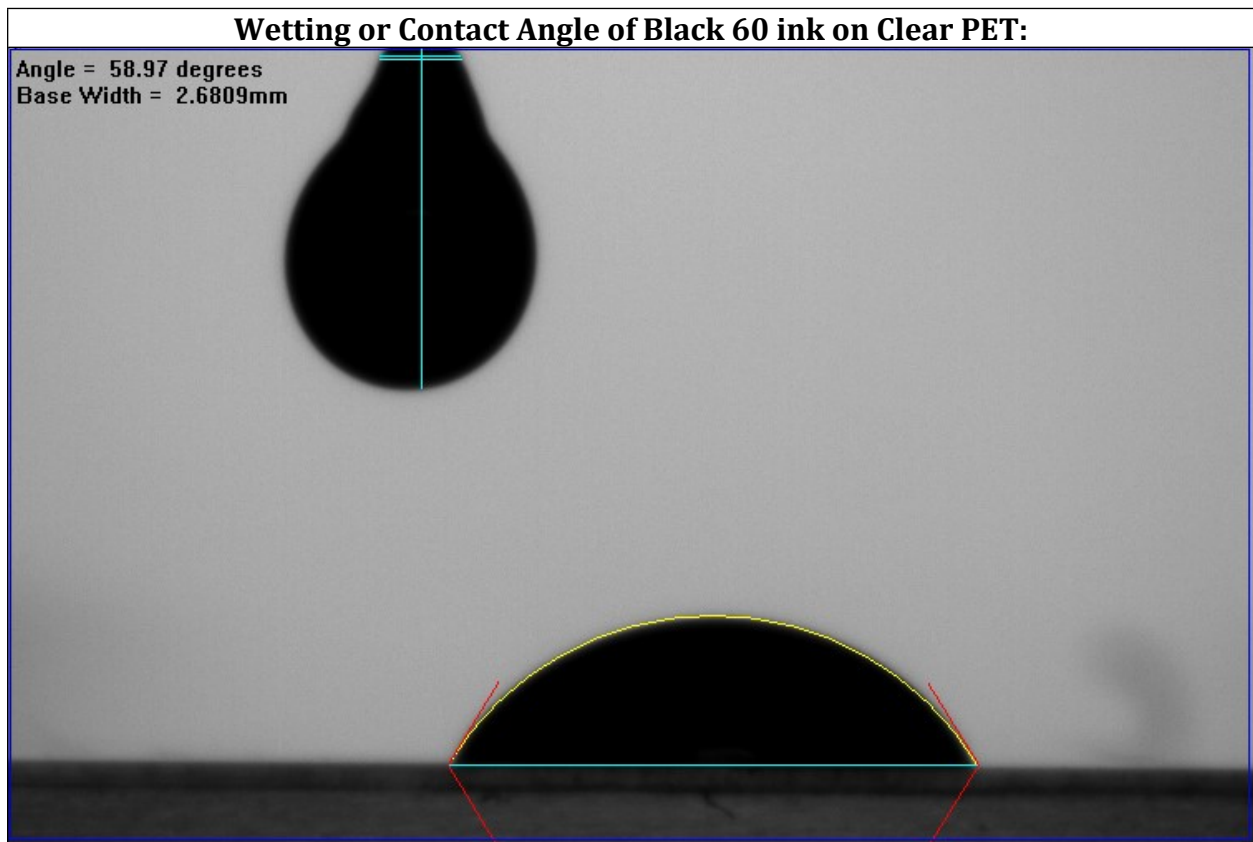

**Figure S-10.** Contact Angle of Black 60 ink on Clear PET plastic surface. Measured with the instrument First Ten Angstroms FTA200 using Sessile Drop Method.

**Wetting or Contact Angle of ECI 7007 ink on White PET:**

Angle = 61.15 degrees  
Base Width = 3.1548mm

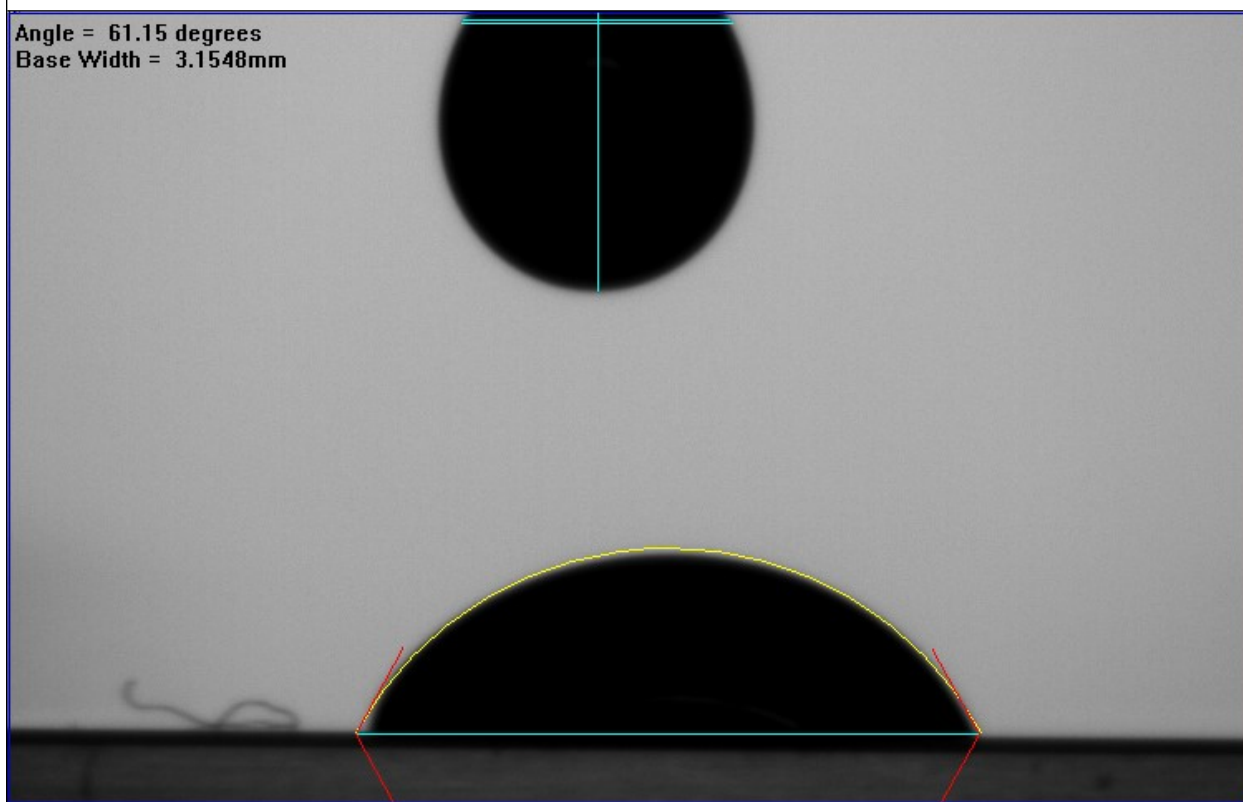

**Figure S-11.** Contact Angle of ECI 7007 ink on White PET plastic surface. Measured with the instrument First Ten Angstroms FTA200 using Sessile Drop Method.

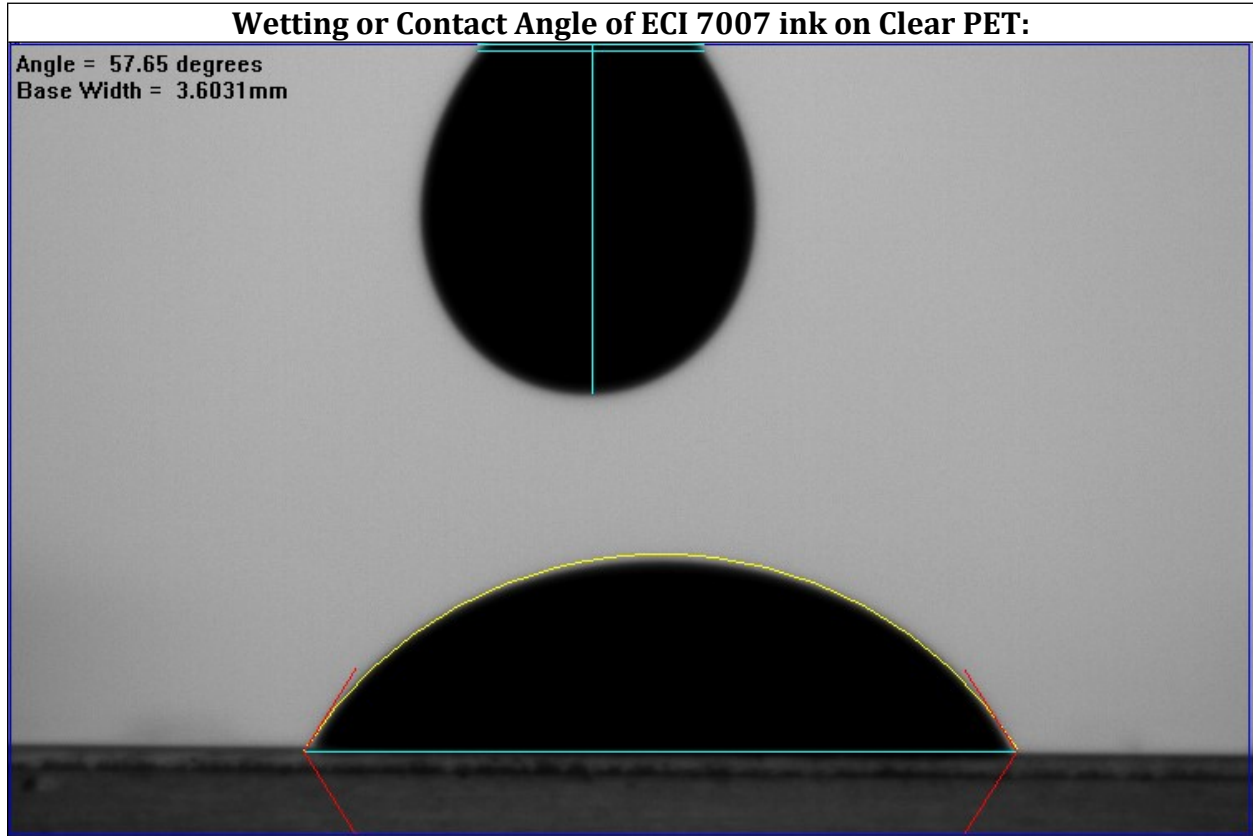

**Figure S-12.** Contact Angle of ECI 7007 ink on Clear PET plastic surface. Measured with the instrument First Ten Angstroms FTA200 using Sessile Drop Method.



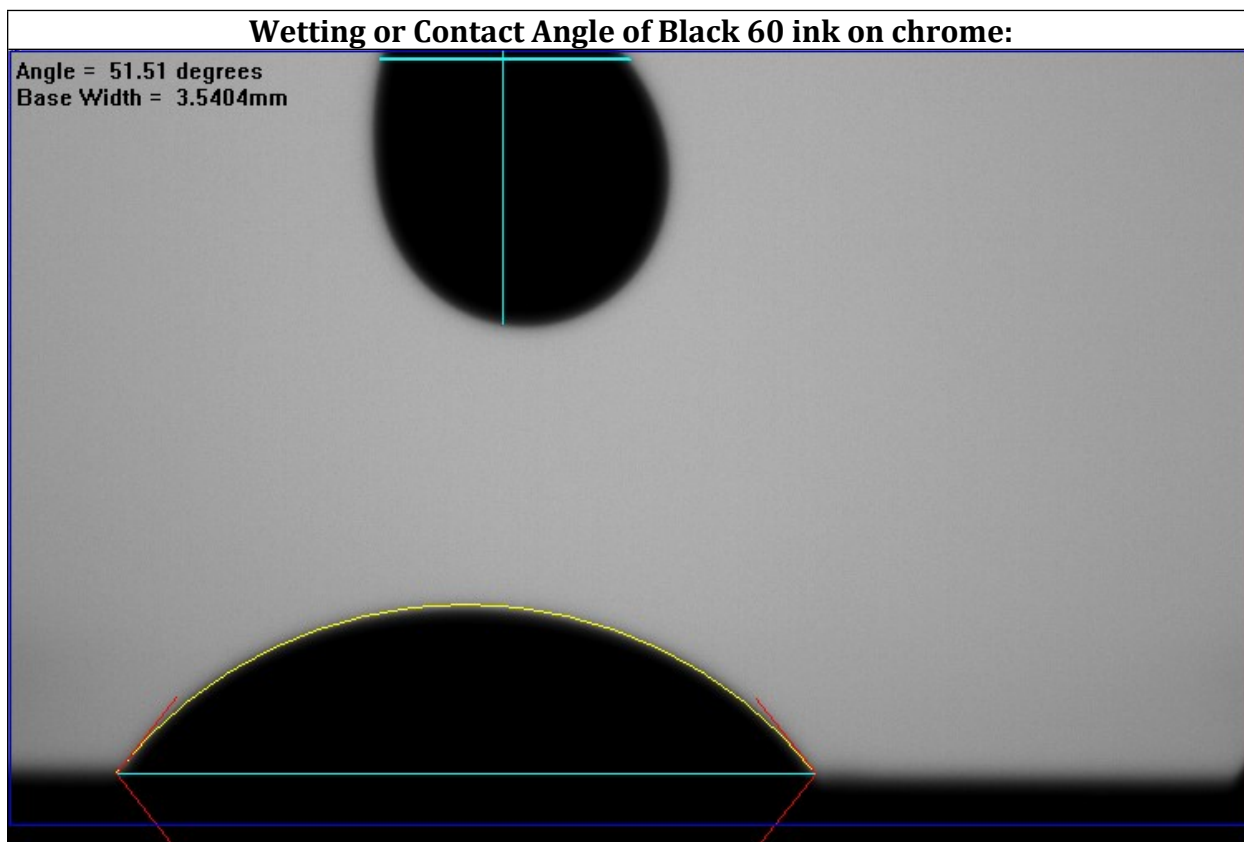

**Figure S-13.** Contact Angle of Black 60 ink on chrome surface. Measured with the instrument First Ten Angstroms FTA200 using Sessile Drop Method.

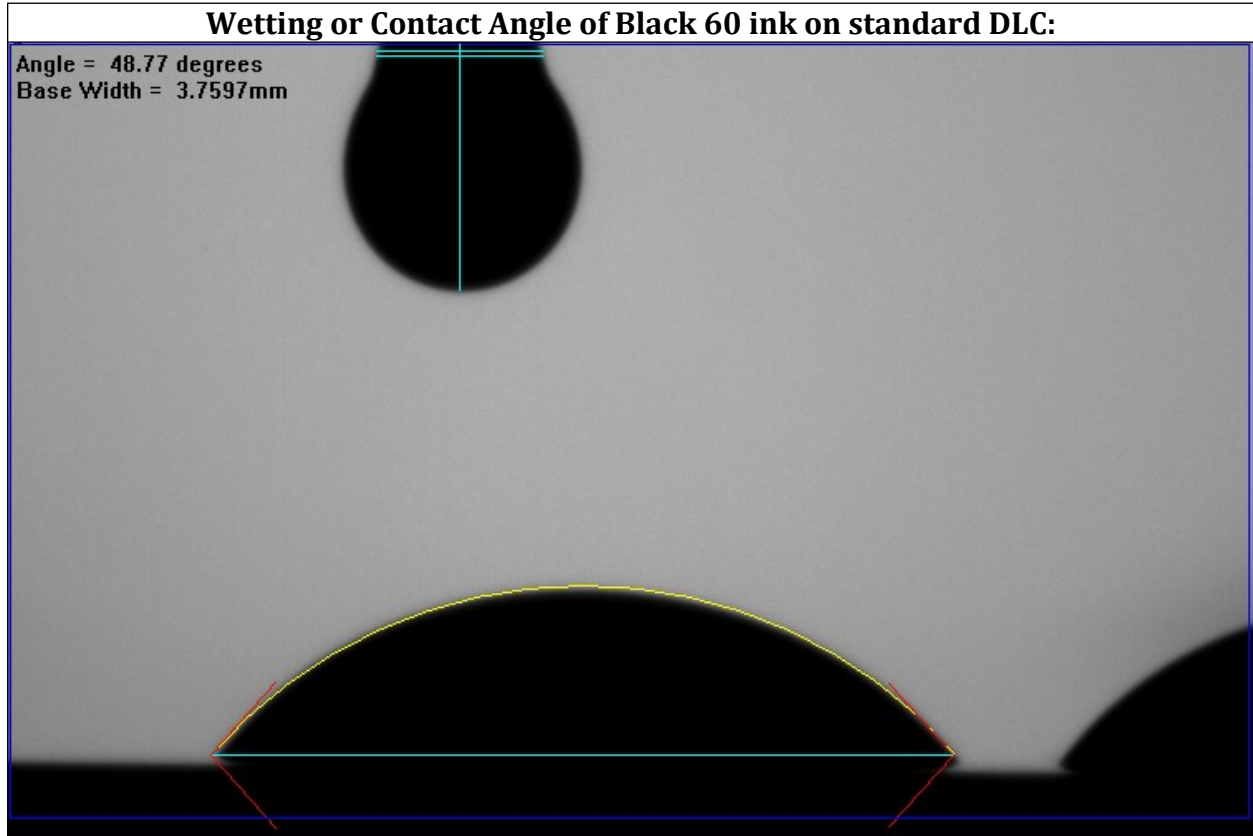

**Figure S-14.** Contact Angle of Black 60 ink on standard DLC surface. Measured with the instrument First Ten Angstroms FTA200 using Sessile Drop Method.

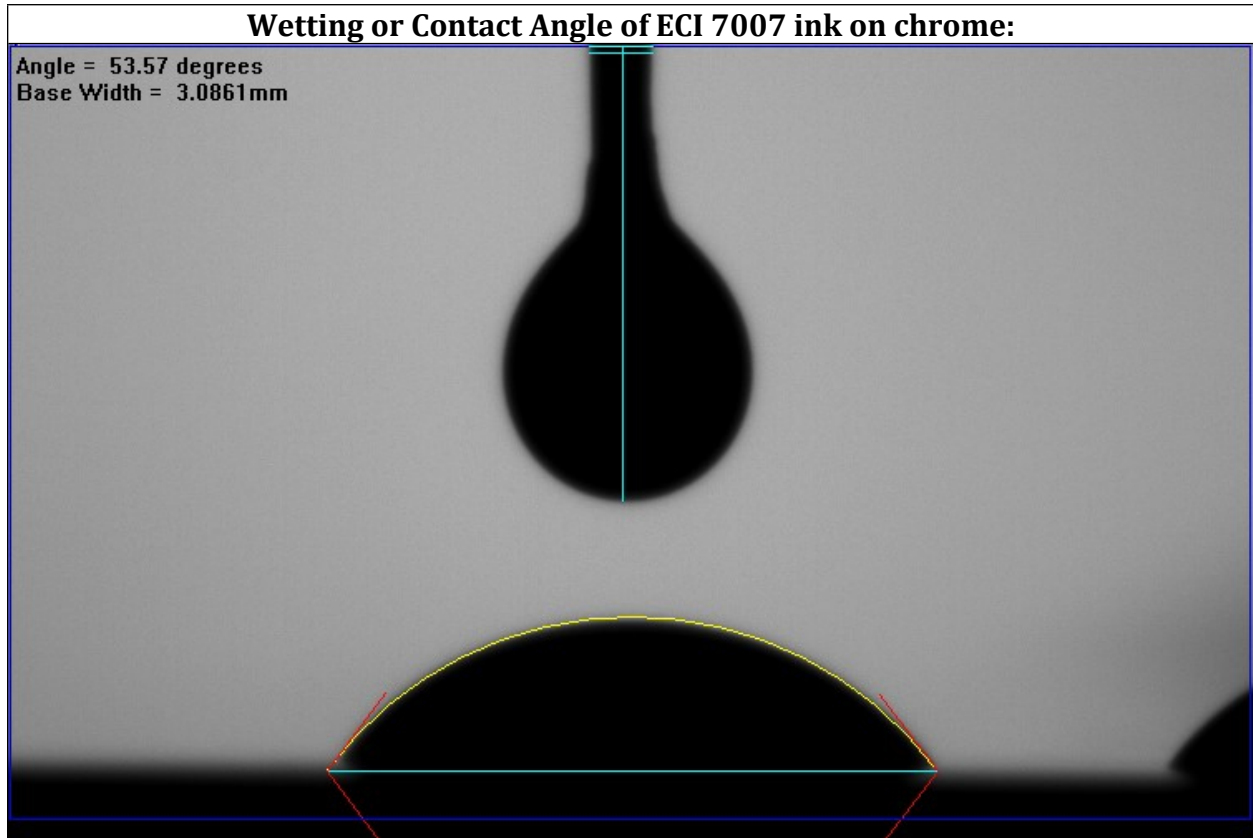

**Figure S-15.** Contact Angle of ECI 7007 ink on chrome surface. Measured with the instrument First Ten Angstroms FTA200 using Sessile Drop Method.

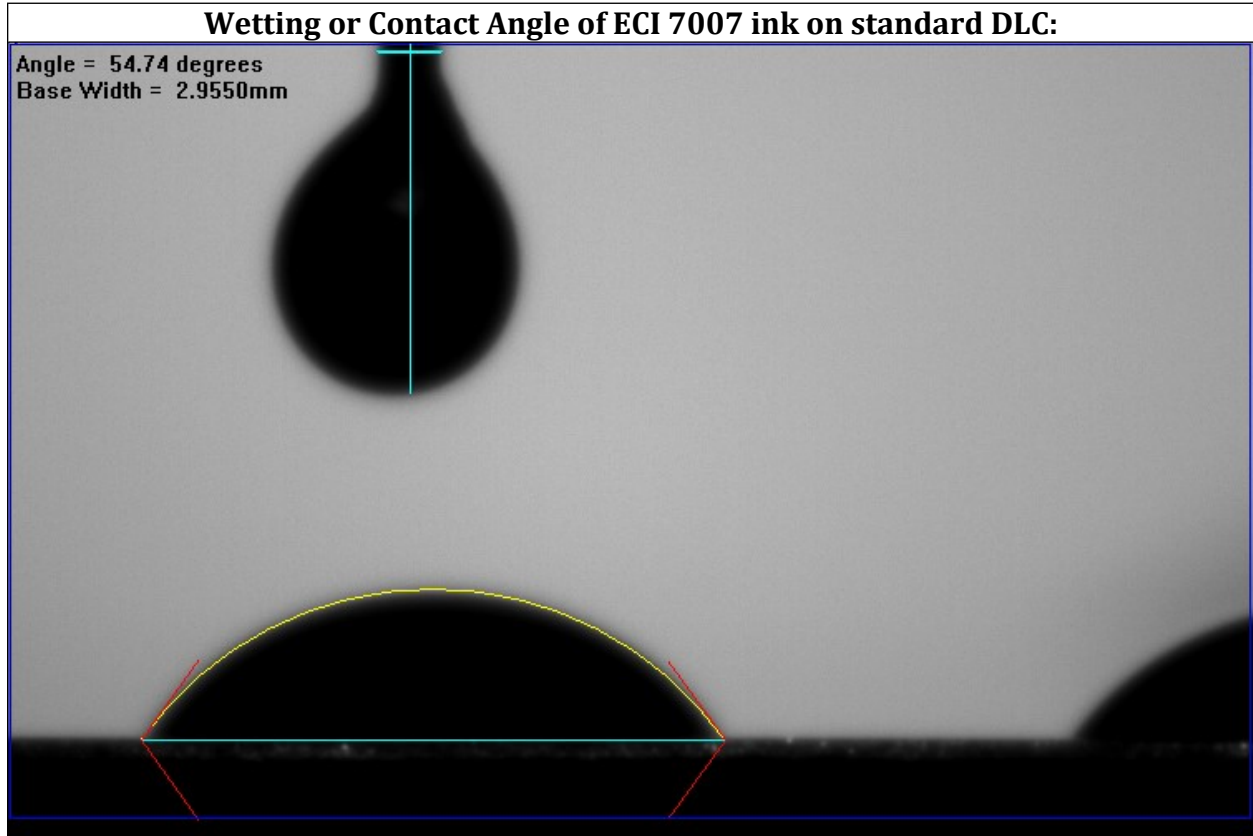

**Figure S-16.** Contact Angle of ECI 7007 ink on standard DLC surface. Measured with the instrument First Ten Angstroms FTA200 using Sessile Drop Method.

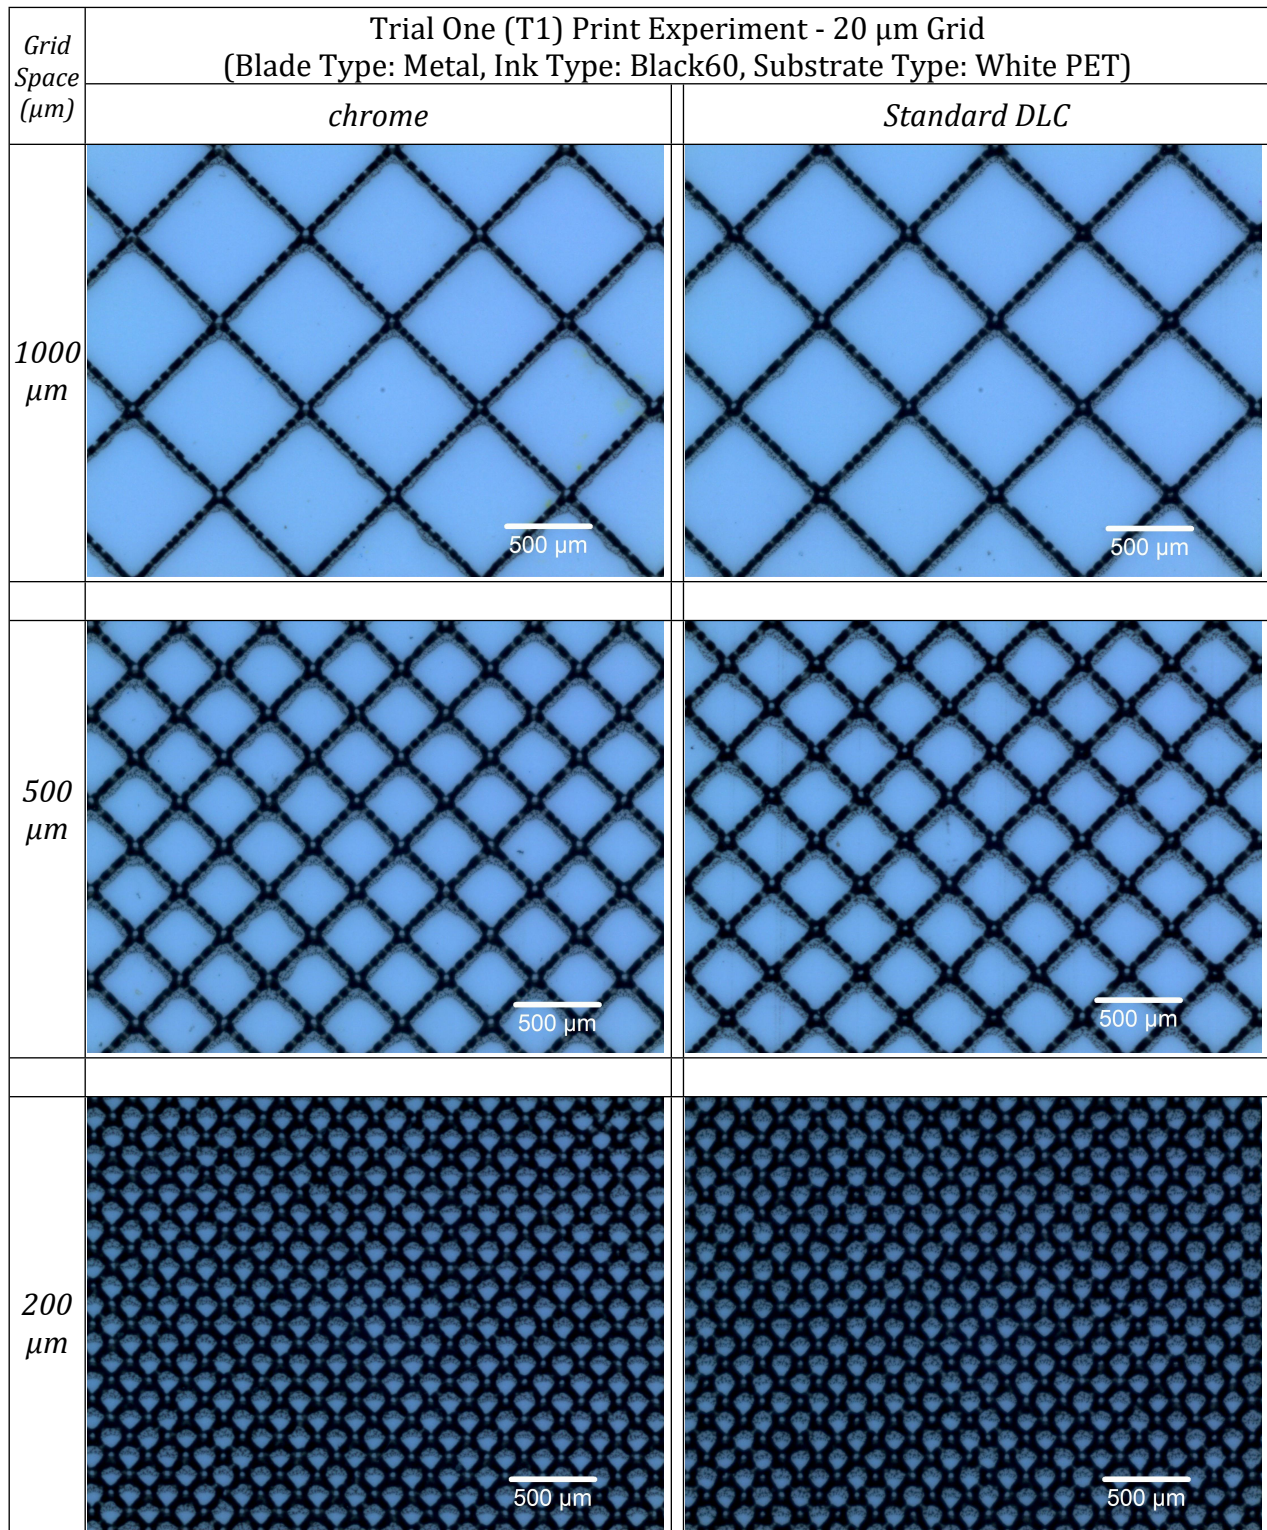

**Figure S-17.** Trial One Print Experiment- 20  $\mu\text{m}$  Grid (Blade Type: Metal, Ink Type: Black60, Substrate Type: White PET).

| Grid Space (μm) | Trial One (T1) Print Experiment - 30 μm Grid<br>(Blade Type: Metal, Ink Type: Black60, Substrate Type: White PET) |                                                                                      |
|-----------------|-------------------------------------------------------------------------------------------------------------------|--------------------------------------------------------------------------------------|
|                 | chrome                                                                                                            | Standard DLC                                                                         |
| 1000 μm         | 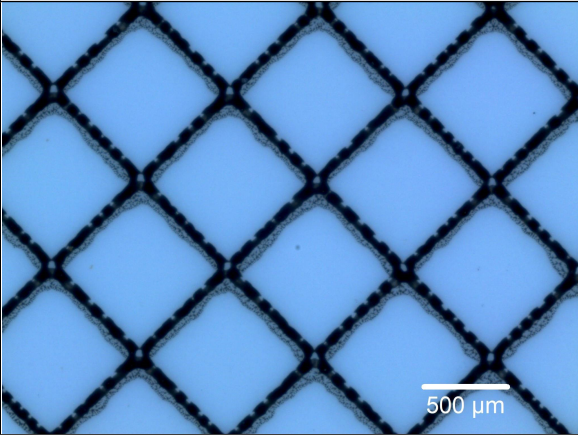                                 |    |
| 500 μm          |                                 |   |
| 200 μm          |                                |  |

**Figure S-18.** Trial One Print Experiment- 30 μm Grid (Blade Type: Metal, Ink Type: Black60, Substrate Type: White PET).

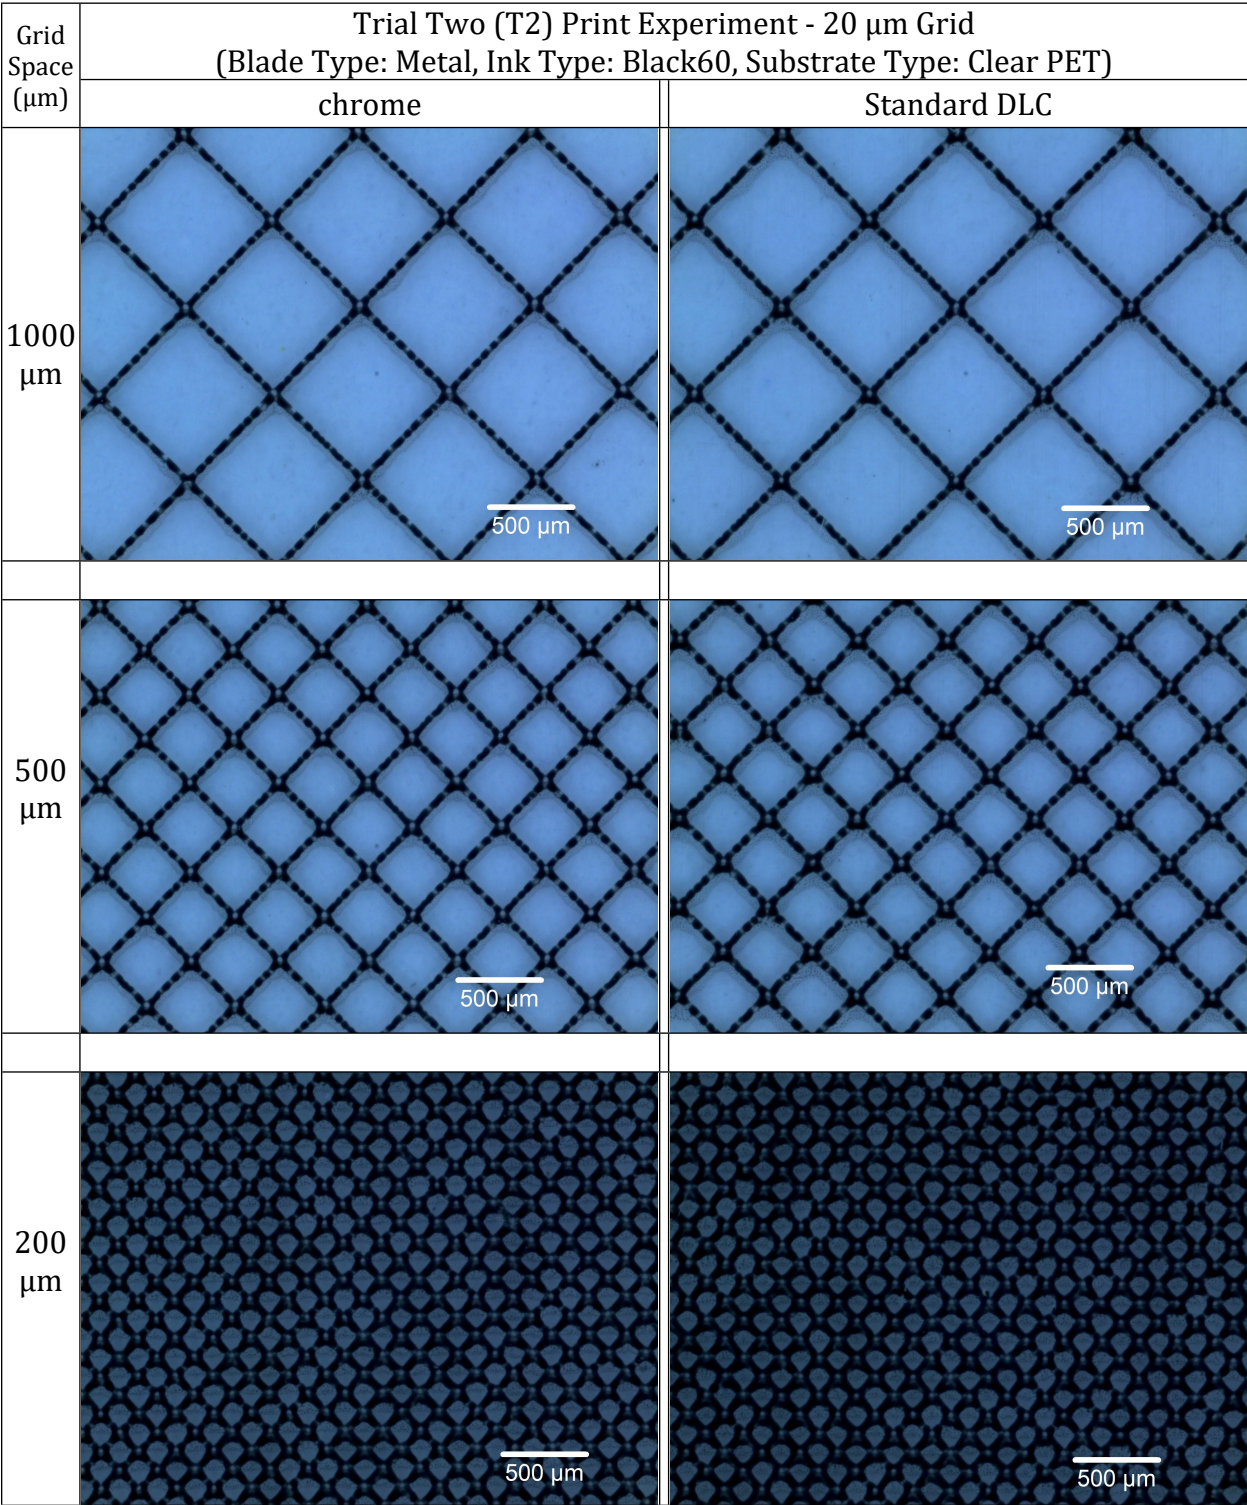

**Figure S-19.** Trial Two Print Experiment - 20 μm Grid (Blade Type: Metal, Ink Type: Black60, Substrate Type: Clear PET).

| Trial Two (T2) Print Experiment - 30 $\mu\text{m}$ Grid<br>(Blade Type: Metal, Ink Type: Black60, Substrate Type: Clear PET) |                                                                                     |                                                                                      |
|------------------------------------------------------------------------------------------------------------------------------|-------------------------------------------------------------------------------------|--------------------------------------------------------------------------------------|
| Grid Space ( $\mu\text{m}$ )                                                                                                 | chrome                                                                              | Standard DLC                                                                         |
| 1000 $\mu\text{m}$                                                                                                           | 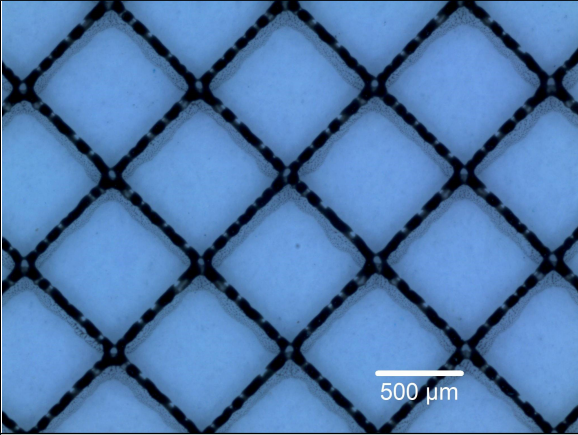   |    |
| 500 $\mu\text{m}$                                                                                                            |   |   |
| 200 $\mu\text{m}$                                                                                                            |  |  |

**Figure S-20.** Trial Two Print Experiment - 30  $\mu\text{m}$  Grid (Blade Type: Metal, Ink Type: Black60, Substrate Type: Clear PET).



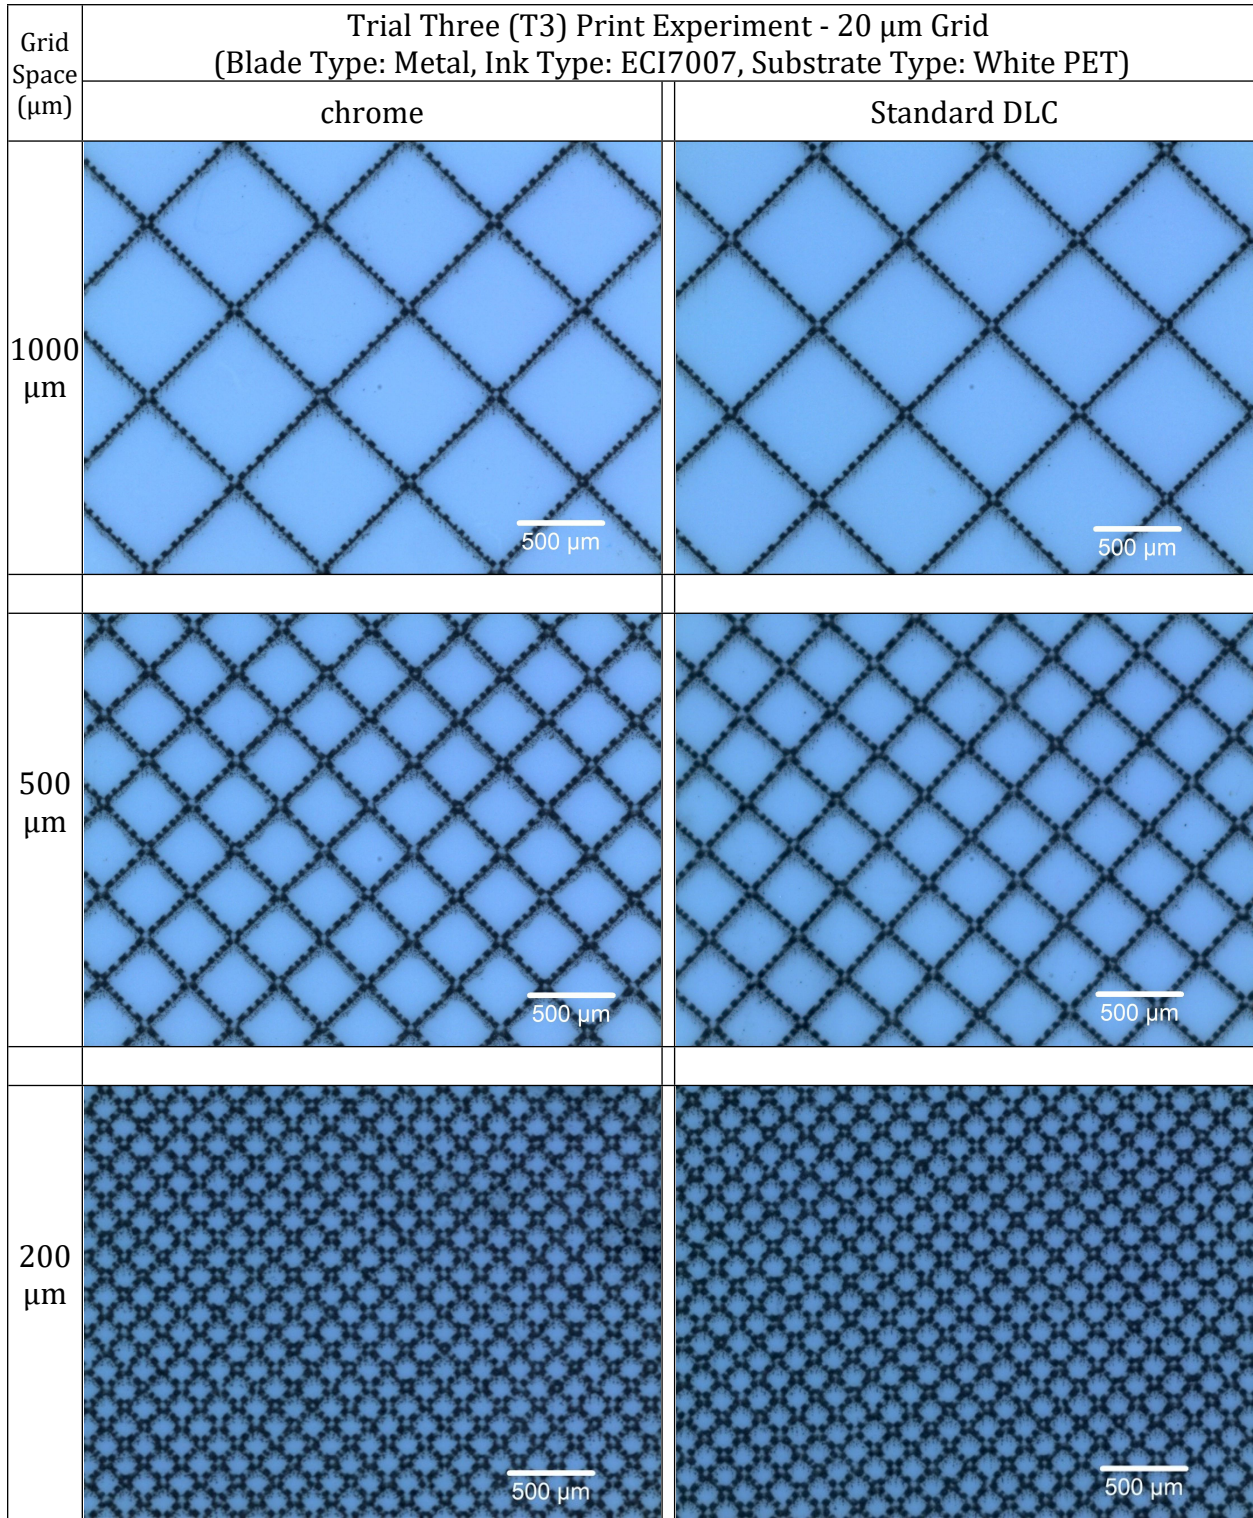

**Figure S-21.** Trial Three Print Experiment - 20 μm Grid (Blade Type: Metal, Ink Type: ECI7007, Substrate Type: White PET).

| Grid Space (μm) | Trial Three (T3) Print Experiment - 30 μm Grid<br>(Blade Type: Metal, Ink Type: ECI7007, Substrate Type: White PET) |                                                                                      |
|-----------------|---------------------------------------------------------------------------------------------------------------------|--------------------------------------------------------------------------------------|
|                 | chrome                                                                                                              | Standard DLC                                                                         |
| Space 1000 μm   | 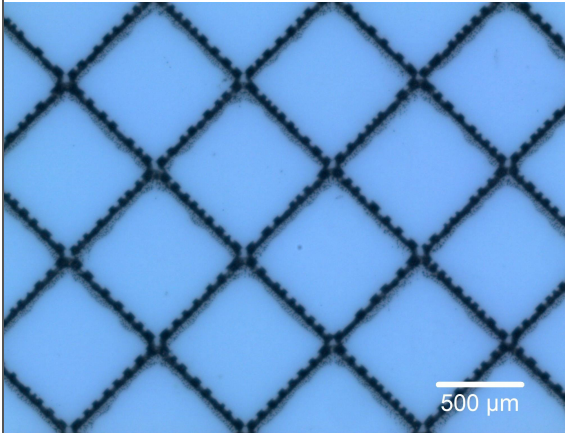                                   |    |
| Space 500 μm    |                                   |   |
| Space 200 μm    |                                  |  |

**Figure S-22.** Trial Three Print Experiment - 30 μm Grid (Blade Type: Metal, Ink Type: ECI7007, Substrate Type: White PET).

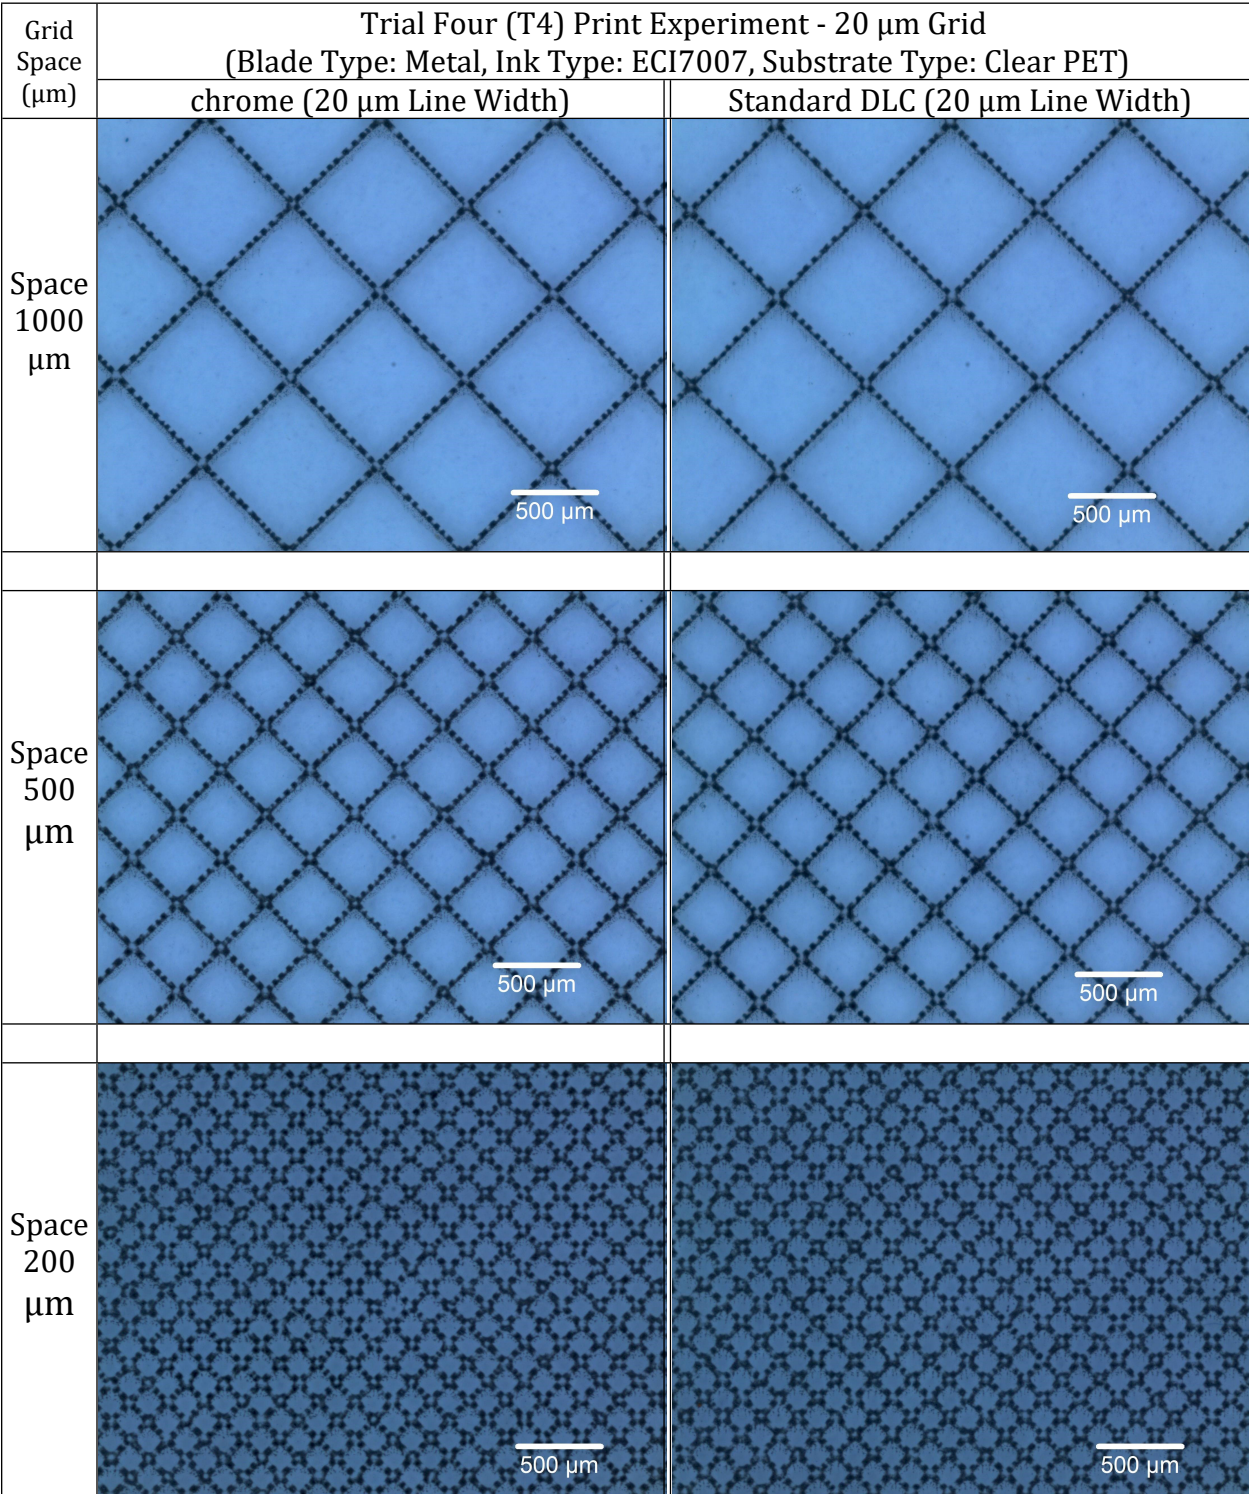

**Figure S-23.** Trial Four Print Experiment - 20 μm Grid (Blade Type: Metal, Ink Type: ECI7007, Substrate Type: Clear PET).

| Grid Space (μm) | Trial Four (T4) Print Experiment - 30 μm Grid<br>(Blade Type: Metal, Ink Type: ECI7007, Substrate Type: Clear PET) |                                                                                      |
|-----------------|--------------------------------------------------------------------------------------------------------------------|--------------------------------------------------------------------------------------|
|                 | chrome                                                                                                             | Standard DLC                                                                         |
| Space 1000 μm   | 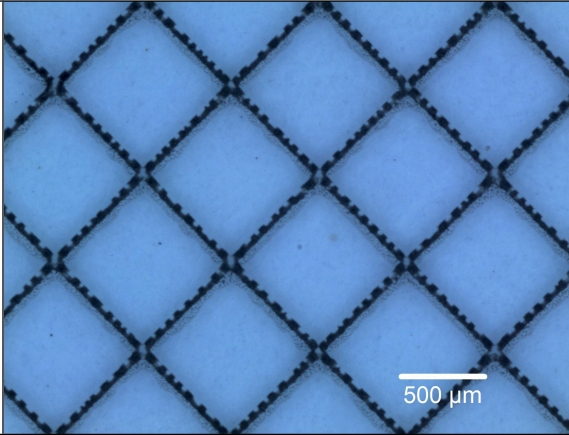                                  |    |
| Space 500 μm    |                                  |   |
| Space 200 μm    |                                 |  |

**Figure S-24.** Trial Four Print Experiment - 30 μm Grid (Blade Type: Metal, Ink Type: ECI7007, Substrate Type: Clear PET).

| Grid Space (μm) | Trial Five (T5) Print Experiment - 20 μm Grid<br>(Blade Type: Plastic, Ink Type: Black60, Substrate Type: White PET) |                                                                                      |
|-----------------|----------------------------------------------------------------------------------------------------------------------|--------------------------------------------------------------------------------------|
|                 | chrome                                                                                                               | Standard DLC                                                                         |
| Space 1000 μm   | 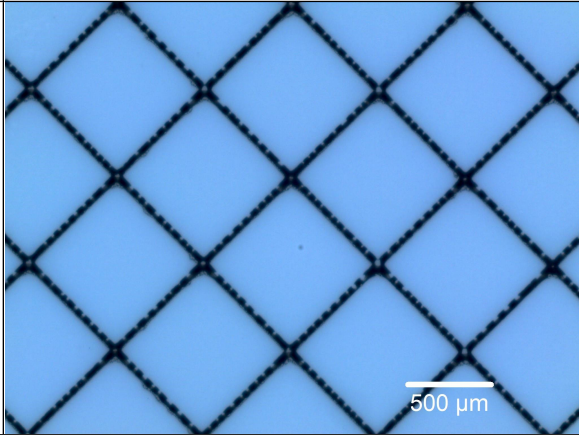                                    |    |
| Space 500 μm    |                                    |   |
| Space 200 μm    |                                   |  |

**Figure S-25.** Trial Five Print Experiment - 20 μm Grid (Blade Type: Plastic, Ink Type: Black60, Substrate Type: White PET).

| Grid Space ( $\mu\text{m}$ ) | Trial Five (T5) Print Experiment - 30 $\mu\text{m}$ Grid<br>(Blade Type: Plastic, Ink Type: Black60, Substrate Type: White PET) |                                                                                      |
|------------------------------|---------------------------------------------------------------------------------------------------------------------------------|--------------------------------------------------------------------------------------|
|                              | chrome                                                                                                                          | Standard DLC                                                                         |
| Space 1000 $\mu\text{m}$     | 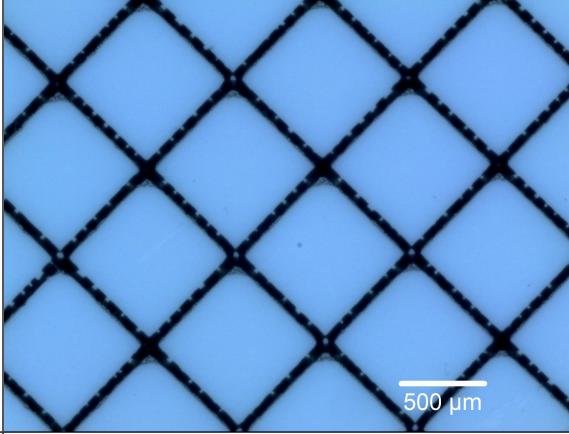                                               |    |
| Space 500 $\mu\text{m}$      |                                               |   |
| Space 200 $\mu\text{m}$      |                                              |  |

**Figure S-26.** Trial Five Print Experiment - 30  $\mu\text{m}$  Grid (Blade Type: Plastic, Ink Type: Black60, Substrate Type: White PET).

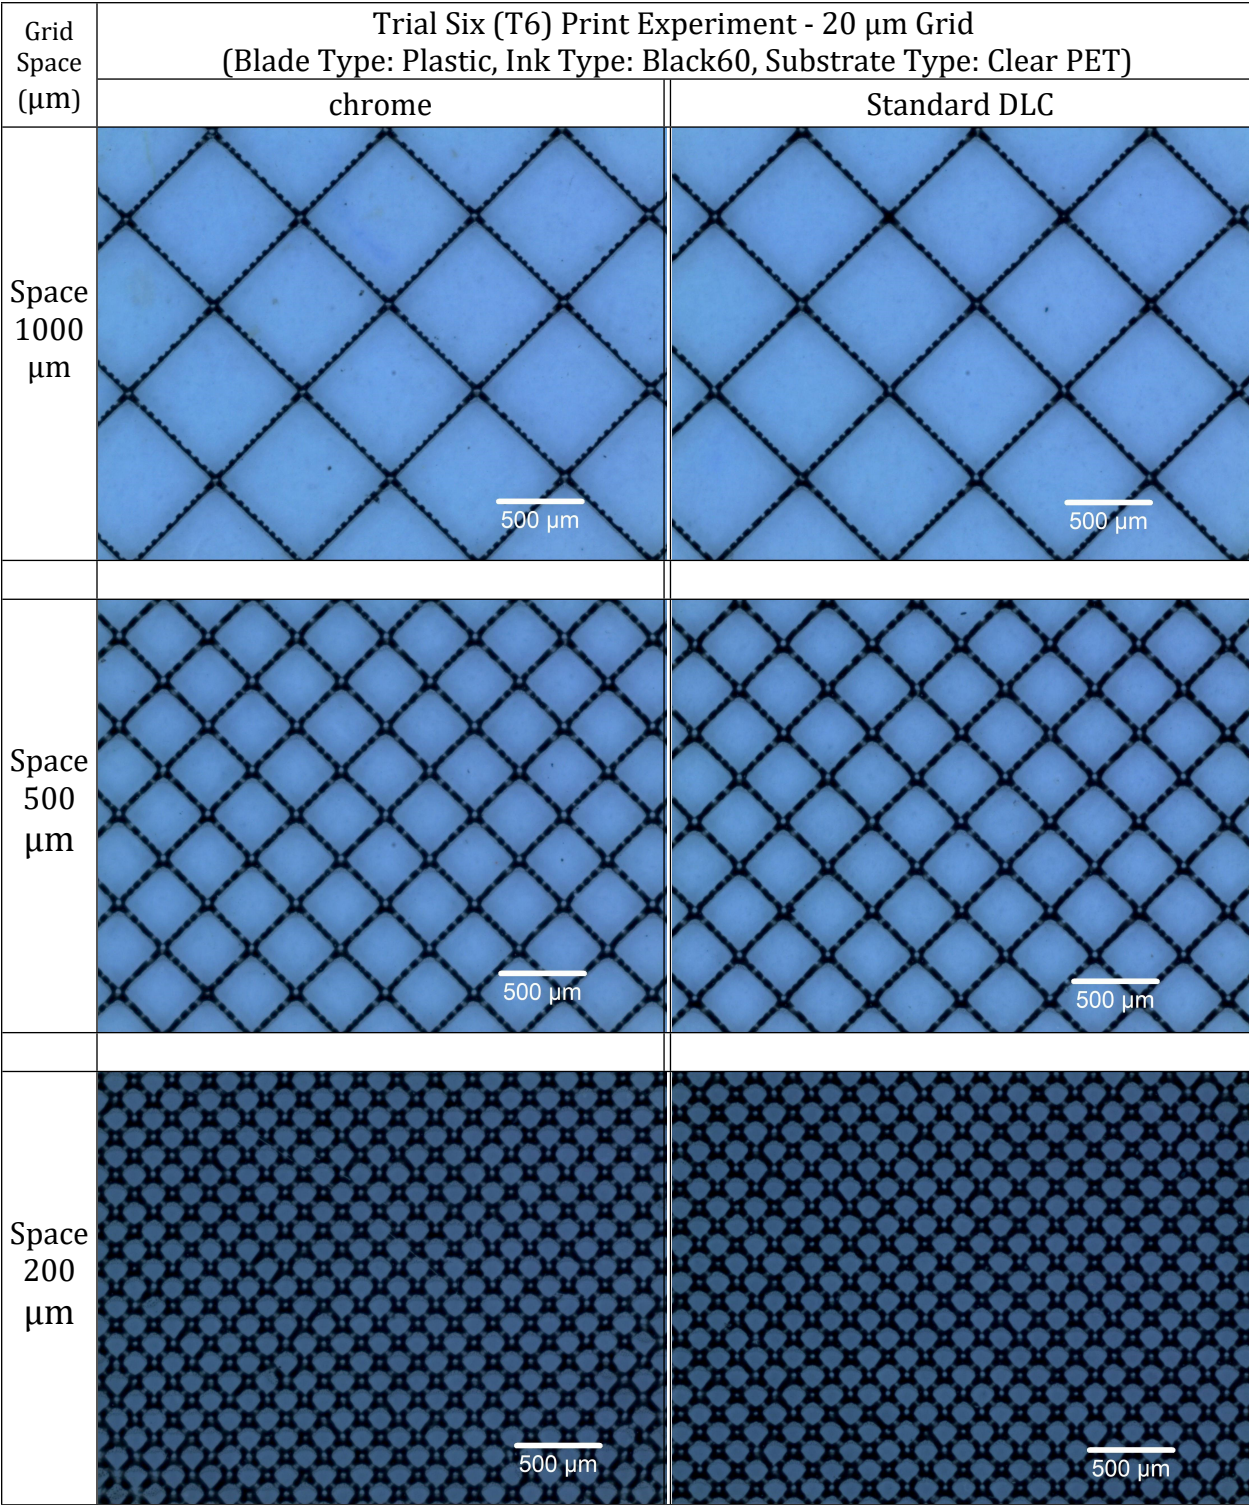

**Figure S-27.** Trial Six Print Experiment - 20 μm Grid (Blade Type: Plastic, Ink Type: Black60, Substrate Type: Clear PET).

| Grid Space ( $\mu\text{m}$ ) | Trial Six (T6) Print Experiment - 30 $\mu\text{m}$ Grid<br>(Blade Type: Plastic, Ink Type: Black60, Substrate Type: Clear PET) |                                                                                      |
|------------------------------|--------------------------------------------------------------------------------------------------------------------------------|--------------------------------------------------------------------------------------|
|                              | chrome                                                                                                                         | Standard DLC                                                                         |
| Space 1000 $\mu\text{m}$     | 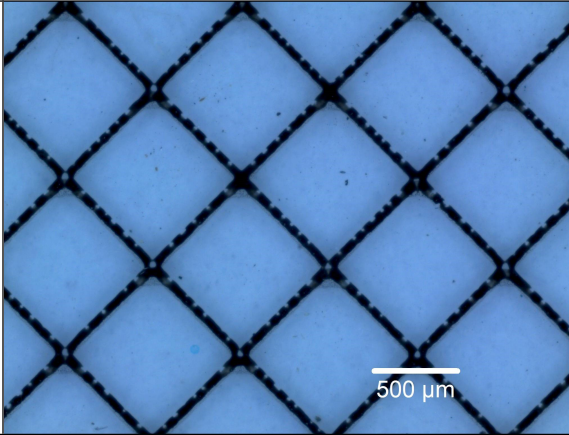                                              |    |
| Space 500 $\mu\text{m}$      |                                              |   |
| Space 200 $\mu\text{m}$      |                                             |  |

**Figure S-28.** Trial Six Print Experiment - 30  $\mu\text{m}$  Grid (Blade Type: Plastic, Ink Type: Black60, Substrate Type: Clear PET).



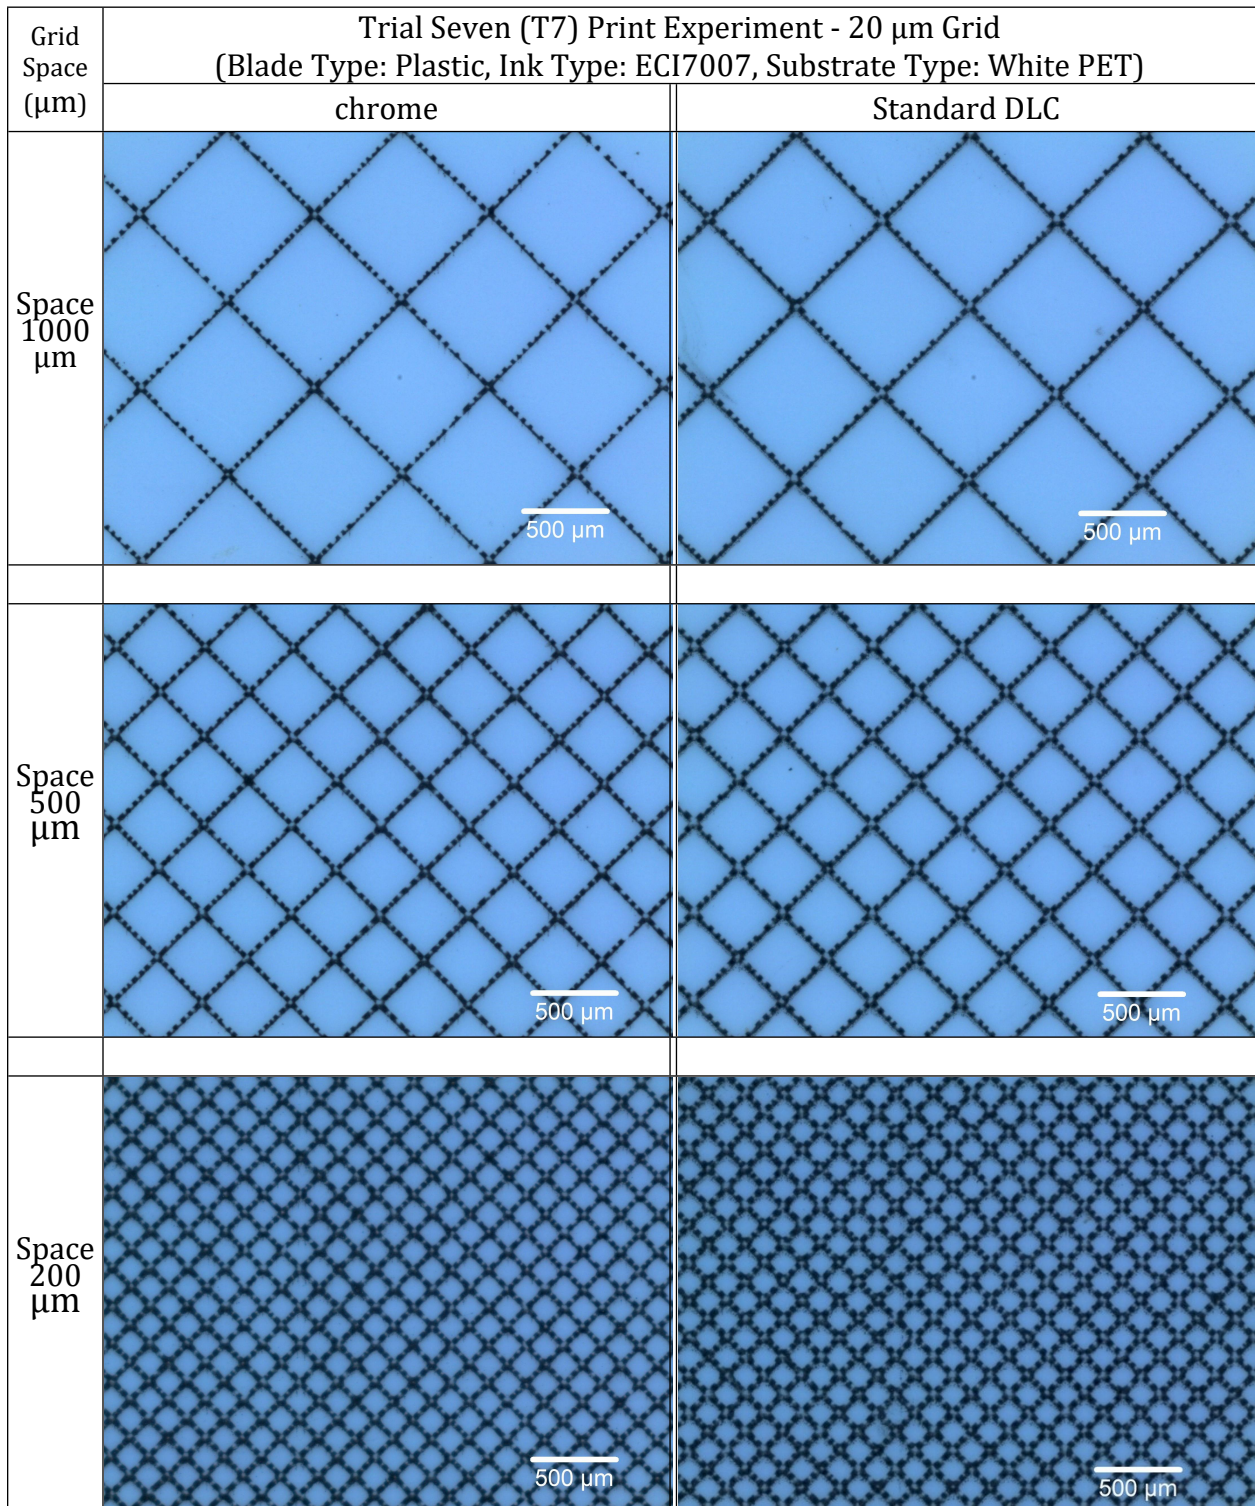

**Figure S-29.** Trial Seven Print Experiment - 20  $\mu\text{m}$  Grid (Blade Type: Plastic, Ink Type: ECI7007, Substrate Type: White PET).

| Grid Space (μm) | Trial Seven (T7) Print Experiment - 30 μm Grid<br>(Blade Type: Plastic, Ink Type: ECI7007, Substrate Type: White PET) |                                                                                      |
|-----------------|-----------------------------------------------------------------------------------------------------------------------|--------------------------------------------------------------------------------------|
|                 | chrome                                                                                                                | Standard DLC                                                                         |
| Space 1000 μm   | 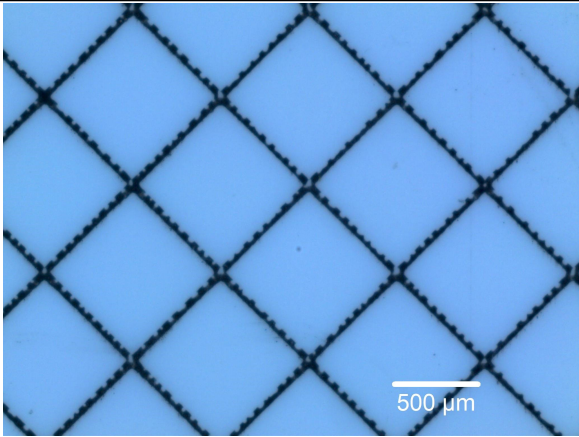                                     |    |
| Space 500 μm    |                                     |   |
| Space 200 μm    |                                    |  |

**Figure S-30.** Trial Seven Print Experiment - 30 μm Grid (Blade Type: Plastic, Ink Type: ECI7007, Substrate Type: White PET).

| Grid Space (μm) | Trial Eight (T8) Print Experiment - 20 μm Grid<br>(Blade Type: Plastic, Ink Type: ECI7007, Substrate Type: Clear PET) |                                                                                      |
|-----------------|-----------------------------------------------------------------------------------------------------------------------|--------------------------------------------------------------------------------------|
|                 | chrome                                                                                                                | Standard DLC                                                                         |
| Space 1000 μm   | 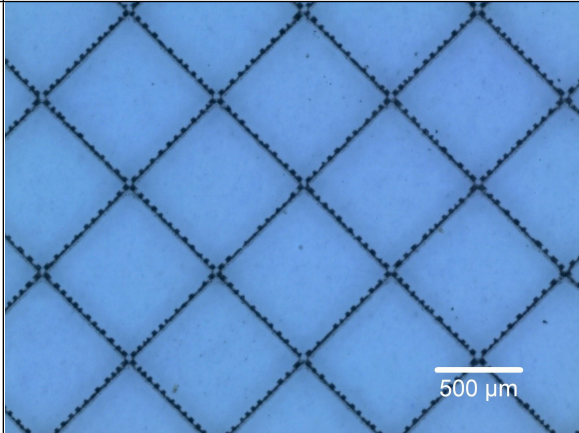                                     |    |
| Space 500 μm    |                                     |   |
| Space 200 μm    |                                    |  |

**Figure S-31.** Trial Eight Print Experiment - 20 μm Grid (Blade Type: Plastic, Ink Type: ECI7007, Substrate Type: Clear PET)

| Grid Space ( $\mu\text{m}$ ) | Trial Eight (T8) Print Experiment - 30 $\mu\text{m}$ Grid<br>(Blade Type: Plastic, Ink Type: ECI7007, Substrate Type: Clear PET) |                                                                                      |
|------------------------------|----------------------------------------------------------------------------------------------------------------------------------|--------------------------------------------------------------------------------------|
|                              | chrome                                                                                                                           | Standard DLC                                                                         |
| Space 1000 $\mu\text{m}$     | 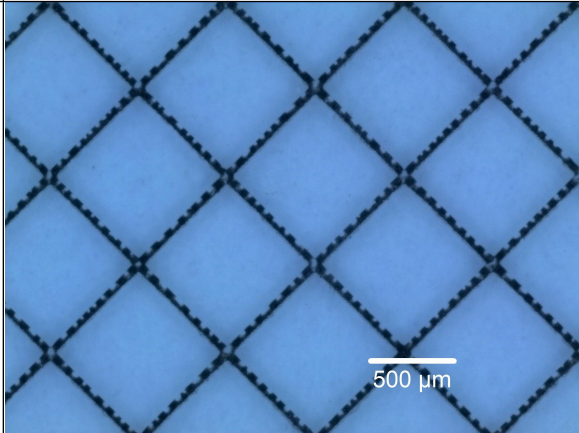                                                |    |
| Space 500 $\mu\text{m}$      |                                                |   |
| Space 200 $\mu\text{m}$      |                                               |  |

**Figure S-32.** Trial Eight Print Experiment - 30  $\mu\text{m}$  Grid (Blade Type: Plastic, Ink Type: ECI7007, Substrate Type: Clear PET)

## Statistical Analysis of Line Width

There were three print samples obtained for each of the trial experiments and associated print conditions. All of the three samples were used to collect 25 data point/replicates of line width data in one observation for each of the printed grids of 20  $\mu\text{m}$  and 30  $\mu\text{m}$ .

The statistical analysis of the line width data collected can be divided into two parts:

1. Comparing the DLC and chrome surfaces, using the same blade type, ink, and substrate for the eight trial experiments, for each individual line spacing under 20 $\mu\text{m}$  and 30 $\mu\text{m}$  grids, as well as for the combined grids spacing for the 20 $\mu\text{m}$  and 30 $\mu\text{m}$  line widths.
2. Performing a factorial analysis to identify which factors (surface, blade, substrate, ink, and grid) are significant to the line width.

Part 1 Results: –

Statistical analysis of data from eight experimental trials was conducted using Minitab software v21.2. A two-sample test for variance was applied to each comparison to determine whether to assume equal or unequal variance, followed by a two-sample t-test at a 5% significance level. The hypothesis that Standard DLC is better to chrome was tested. The results of the tests are tabulated in Tables S-1 and S-2. There were 25 observations for each grid spacing (1000  $\mu\text{m}$ , 500  $\mu\text{m}$ , and 200  $\mu\text{m}$ ) for 20  $\mu\text{m}$  and 30  $\mu\text{m}$  line widths, resulting in a total of 75 observations. In Table S-2, results are shown for 20  $\mu\text{m}$  line widths.

**Table S-2. Statistical Comparisons of 20  $\mu\text{m}$  Grids**

| Trial No.                  | Surface Type | 20 $\mu\text{m}$ Grid                                                           |              |                                                                                |            |                                                                                |            |                                                                               |       |
|----------------------------|--------------|---------------------------------------------------------------------------------|--------------|--------------------------------------------------------------------------------|------------|--------------------------------------------------------------------------------|------------|-------------------------------------------------------------------------------|-------|
|                            |              | 2-sample t-test p value ( $\alpha=0.05$ : Reject Null hypothesis) *             |              |                                                                                |            |                                                                                |            |                                                                               |       |
|                            |              | 20 $\mu\text{m}$ Grid<br>1000 $\mu\text{m}$ Spacing<br>(Samples size<br>N = 25) |              | 20 $\mu\text{m}$ Grid<br>500 $\mu\text{m}$ Spacing<br>(Samples size<br>N = 25) |            | 20 $\mu\text{m}$ Grid<br>200 $\mu\text{m}$ Spacing<br>(Samples size<br>N = 25) |            | 20 $\mu\text{m}$ Grid<br>All Spacing<br>(Samples Size<br>in each Trial: N=75) |       |
| Avg Width<br>$\pm$ Std Dev | P<br>value   | Avg Width<br>$\pm$ Std Dev                                                      | P<br>value   | Avg Width<br>$\pm$ Std Dev                                                     | P<br>value | Avg Width<br>$\pm$ Std Dev                                                     | P<br>value |                                                                               |       |
| 1                          | chrome       | 46.9 $\pm$ 1.3                                                                  | 0.000        | 53.4 $\pm$ 0.6                                                                 | 0.000      | 58.5 $\pm$ 1.1                                                                 | 0.000      | 53.0 $\pm$ 4.9                                                                | 0.000 |
|                            | Std DLC      | 51.4 $\pm$ 0.7                                                                  |              | 57.2 $\pm$ 1.7                                                                 |            | 59.9 $\pm$ 0.6                                                                 |            | 56.2 $\pm$ 3.7                                                                |       |
| 2                          | chrome       | 36.9 $\pm$ 1.3                                                                  | 0.000        | 41.0 $\pm$ 0.6                                                                 | 0.000      | 45.2 $\pm$ 0.5                                                                 | 0.000      | 41.0 $\pm$ 3.6                                                                | 0.000 |
|                            | Std DLC      | 41.7 $\pm$ 0.4                                                                  |              | 44.9 $\pm$ 0.6                                                                 |            | 51.7 $\pm$ 1.0                                                                 |            | 46.1 $\pm$ 4.3                                                                |       |
| 3                          | chrome       | 32.3 $\pm$ 1.0                                                                  | 0.000        | 35.4 $\pm$ 1.4                                                                 | 0.000      | 37.7 $\pm$ 1.8                                                                 | 0.000      | 35.1 $\pm$ 2.7                                                                | 0.000 |
|                            | Std DLC      | 36.3 $\pm$ 1.2                                                                  |              | 39.4 $\pm$ 1.8                                                                 |            | 40.3 $\pm$ 2.5                                                                 |            | 38.7 $\pm$ 2.5                                                                |       |
| 4                          | chrome       | 24.2 $\pm$ 2.0                                                                  | 0.000        | 27.0 $\pm$ 1.2                                                                 | 0.000      | 33.1 $\pm$ 2.2                                                                 | 0.000      | 28.1 $\pm$ 4.2                                                                | 0.003 |
|                            | Std DLC      | 26.7 $\pm$ 1.6                                                                  |              | 28.6 $\pm$ 1.2                                                                 |            | 34.4 $\pm$ 1.4                                                                 |            | 29.9 $\pm$ 3.6                                                                |       |
| 5                          | chrome       | 39.6 $\pm$ 0.7                                                                  | <b>0.868</b> | 42.0 $\pm$ 0.3                                                                 | 0.000      | 48.6 $\pm$ 0.3                                                                 | 0.000      | 43.4 $\pm$ 3.9                                                                | 0.001 |
|                            | Std DLC      | 39.4 $\pm$ 0.8                                                                  |              | 45.0 $\pm$ 0.3                                                                 |            | 53.9 $\pm$ 1.9                                                                 |            | 46.1 $\pm$ 6.1                                                                |       |
| 6                          | chrome       | 27.6 $\pm$ 2.1                                                                  | 0.000        | 34.9 $\pm$ 0.5                                                                 | 0.000      | 42.7 $\pm$ 2.3                                                                 | 0.000      | 35.0 $\pm$ 6.5                                                                | 0.000 |
|                            | Std DLC      | 31.7 $\pm$ 0.6                                                                  |              | 38.1 $\pm$ 0.6                                                                 |            | 50.7 $\pm$ 1.6                                                                 |            | 40.1 $\pm$ 8.1                                                                |       |

|   |         |           |       |           |       |           |       |           |       |
|---|---------|-----------|-------|-----------|-------|-----------|-------|-----------|-------|
| 7 | chrome  | 22.2 ±0.8 | 0.000 | 26.1 ±0.5 | 0.000 | 33.7 ±1.1 | 0.000 | 27.3 ±4.9 | 0.000 |
|   | Std DLC | 26.4 ±1.0 |       | 33.2 ±0.8 |       | 39.7 ±1.1 |       | 33.1 ±5.5 |       |
| 8 | chrome  | 20.4 ±1.0 | 0.333 | 22.7 ±1.0 | 0.000 | 29.8 ±1.8 | 0.000 | 24.3 ±4.2 | 0.019 |
|   | Std DLC | 20.5 ±1.1 |       | 24.6 ±1.1 |       | 32.5 ±0.9 |       | 25.9 ±5.1 |       |

\*Null Hypothesis: chrome( $\sigma_1$ )  $\geq$  ( $\sigma_2$ ) DLC,  
 Alternate Hypothesis chrome ( $\sigma_1$ )  $<$  ( $\sigma_2$ ) DLC,  
 Significance level:  $<\alpha = 0.05$

Note that for the 20  $\mu\text{m}$  line widths, all conditions show a significant higher line width when using standard DLC surface than when using chrome surface except for two conditions. In these conditions, the p value is higher than 0.05 for 20  $\mu\text{m}$  line width and 1000  $\mu\text{m}$  spacing in trial T5 and T8 as shown. In Table S-3, results are shown for 30  $\mu\text{m}$  line widths.

**Table S-3. Statistical Comparisons of 30  $\mu\text{m}$  Grids**

| Trial No.             | Surface Type | 30 $\mu\text{m}$ Grid                                                           |            |                                                                                |            |                                                                                |            |                                                                               |       |
|-----------------------|--------------|---------------------------------------------------------------------------------|------------|--------------------------------------------------------------------------------|------------|--------------------------------------------------------------------------------|------------|-------------------------------------------------------------------------------|-------|
|                       |              | 2-sample t-test p value ( $<\alpha=0.05$ : Reject Null hypothesis)*             |            |                                                                                |            |                                                                                |            |                                                                               |       |
|                       |              | 30 $\mu\text{m}$ Grid<br>1000 $\mu\text{m}$ Spacing<br>(Samples size<br>N = 25) |            | 30 $\mu\text{m}$ Grid<br>500 $\mu\text{m}$ Spacing<br>(Samples size<br>N = 25) |            | 30 $\mu\text{m}$ Grid<br>200 $\mu\text{m}$ Spacing<br>(Samples size<br>N = 25) |            | 30 $\mu\text{m}$ Grid<br>All Spacing<br>(Samples Size<br>in each Trial: N=75) |       |
| Avg Width<br>±Std Dev | P<br>value   | Avg Width<br>±Std Dev                                                           | P<br>value | Avg Width<br>±Std Dev                                                          | P<br>value | Avg Width<br>±Std Dev                                                          | P<br>value |                                                                               |       |
| T1                    | chrome       | 67.1 ±1.4                                                                       | 0.000      | 71.3 ±2.0                                                                      | 0.000      | 85.2 ±0.7                                                                      | 0.000      | 74.5 ±7.9                                                                     | 0.000 |
|                       | Std DLC      | 73.5 ±1.5                                                                       |            | 76.0 ±1.2                                                                      |            | 90.7 ±1.2                                                                      |            | 80.1 ±7.8                                                                     |       |
| T2                    | chrome       | 54.6 ±2.7                                                                       | 0.000      | 58.0 ±1.0                                                                      | 0.000      | 73.8 ±2.3                                                                      | 0.000      | 62.1 ±8.7                                                                     | 0.000 |
|                       | Std DLC      | 62.1 ±1.6                                                                       |            | 64.6 ±0.7                                                                      |            | 82.9 ±1.8                                                                      |            | 69.9 ±9.4                                                                     |       |
| T3                    | chrome       | 46.2 ±1.2                                                                       | 0.000      | 47.5 ±1.2                                                                      | 0.000      | 53.7 ±1.0                                                                      | 0.000      | 49.2 ±3.5                                                                     | 0.000 |
|                       | Std DLC      | 50.1 ±1.8                                                                       |            | 52.5 ±1.7                                                                      |            | 56.3 ±1.9                                                                      |            | 53.0 ±3.1                                                                     |       |
| T4                    | chrome       | 36.3 ±2.1                                                                       | 0.000      | 43.5 ±1.9                                                                      | 0.008      | 50.7 ±2.2                                                                      | 0.000      | 43.5 ±6.3                                                                     | 0.002 |
|                       | Std DLC      | 40.7 ±1.9                                                                       |            | 44.8 ±1.8                                                                      |            | 53.8 ±2.9                                                                      |            | 46.4 ±5.9                                                                     |       |
| T5                    | chrome       | 58.7 ±1.0                                                                       | 0.023      | 59.9 ±0.7                                                                      | 0.000      | 72.4 ±0.7                                                                      | 0.000      | 63.7 ±6.3                                                                     | 0.001 |
|                       | Std DLC      | 59.3 ±1.3                                                                       |            | 63.5 ±0.6                                                                      |            | 80.1 ±0.6                                                                      |            | 67.7 ±9.1                                                                     |       |
| T6                    | chrome       | 47.9 ±1.3                                                                       | 0.406      | 51.8 ±1.0                                                                      | 0.000      | 67.8 ±0.8                                                                      | 0.000      | 55.8 ±8.7                                                                     | 0.012 |
|                       | Std DLC      | 48.0 ±1.2                                                                       |            | 56.1 ±0.8                                                                      |            | 74.6 ±0.7                                                                      |            | 59.6 ±11.2                                                                    |       |
| T7                    | chrome       | 38.2 ±2.4                                                                       | 0.000      | 40.7 ±1.1                                                                      | 0.000      | 49.5 ±0.7                                                                      | 0.000      | 42.8 ±5.1                                                                     | 0.000 |
|                       | Std DLC      | 41.9 ±1.5                                                                       |            | 45.9 ±1.1                                                                      |            | 55.3 ±0.9                                                                      |            | 47.7 ±5.8                                                                     |       |
| T8                    | chrome       | 34.3 ±1.2                                                                       | 0.005      | 37.4 ±0.7                                                                      | 0.000      | 44.8 ±1.2                                                                      | 0.001      | 38.8 ±4.5                                                                     | 0.029 |
|                       | Std DLC      | 35.6 ±2.1                                                                       |            | 39.2 ±1.2                                                                      |            | 46.0 ±1.4                                                                      |            | 40.3 ±4.6                                                                     |       |

\*Null Hypothesis: chrome( $\sigma_1$ )  $\geq$  ( $\sigma_2$ ) DLC,  
 Alternate Hypothesis chrome ( $\sigma_1$ )  $<$  ( $\sigma_2$ ) DLC,  
 Significance level:  $<\alpha = 0.05$

Note that for the 30  $\mu\text{m}$  line widths, all conditions show a significant higher line width when using standard DLC surface than when using chrome surface except for one condition. In these conditions, the p value is higher than 0.05 for 30  $\mu\text{m}$  line width and 1000  $\mu\text{m}$  spacing

in trial T6 as shown. Although the standard DLC surface still indicates a higher line width, the p value is greater than 0.05, indicating less than 95% confidence.

The two-sample t-test results of the grid-to-grid comparison indicate that the line width measured on printed samples of standard DLC is higher than that of chrome, and is statistically significant with a p-value less than 0.005 in all cases, except for a few where the line width of the print samples obtained from both the standard DLC and chrome were the same. Moreover, the t-test results of all grids comparison were found to be statistically significant.

Part 2 Results: –

a. Residual plots –

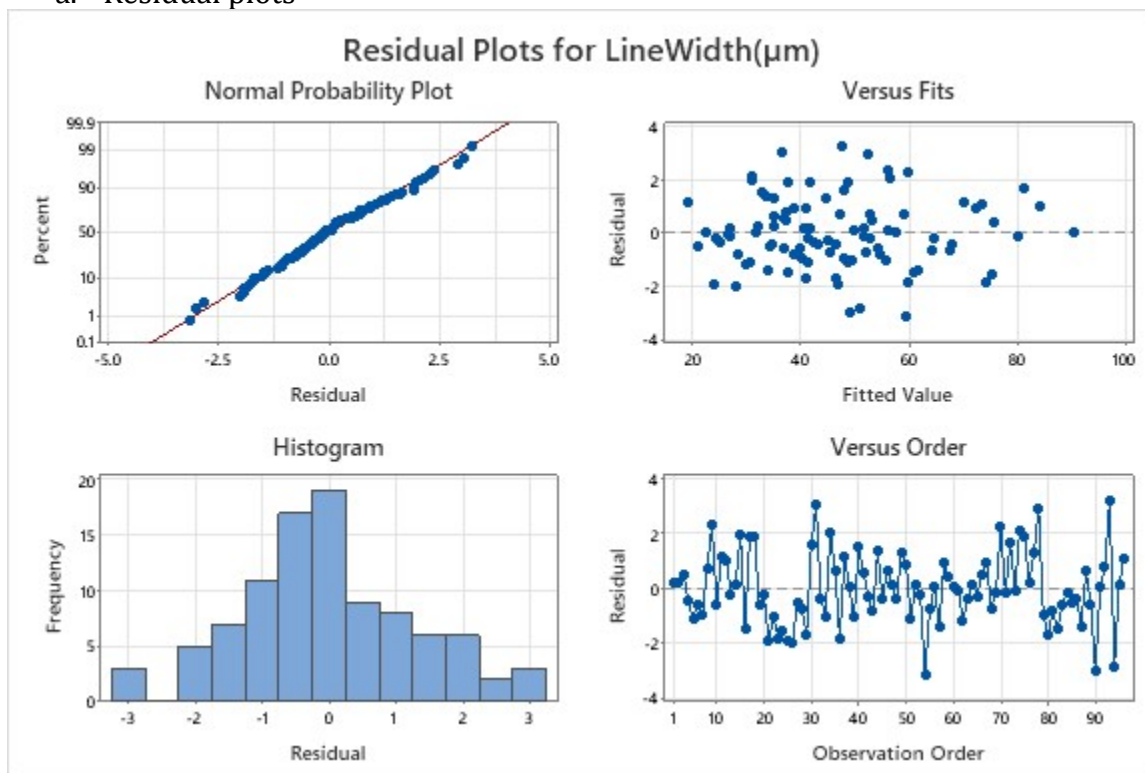

**Figure S-33.** Residual plots for Line Width from Minitab. Results suggest acceptable normality, equity of variance and randomness of data.

The residual plot helps to assess whether all the assumptions of ANOVA are met.

- i. Normality: The normal probability plot and histogram suggest that normality is acceptable.
- ii. Equality of variance: The versus fit plot shows some clustering between the 40 and 60 μm areas, but the variance appears to be equal.
- iii. Independence and randomness: The versus order plot doesn't have any discernible pattern, showing acceptable randomness, independence of data, and minimal bias.

Conclusion – ANOVA appears to be valid.

b. Minitab output for the ANOVA –

**Table S-4.** Analysis of variance in Minitab

| Source            | DF | Adj SS  | Adj MS  | F-Value | P-Value |
|-------------------|----|---------|---------|---------|---------|
| Surface           | 1  | 382.9   | 382.87  | 140.29  | 0.000   |
| Blade             | 1  | 1257.1  | 1257.07 | 460.59  | 0.000   |
| Substrate         | 1  | 1454.4  | 1454.38 | 532.89  | 0.000   |
| Ink               | 1  | 7923.9  | 7923.92 | 2903.33 | 0.000   |
| Grid              | 5  | 10858.6 | 2171.72 | 795.72  | 0.000   |
| Surface*Blade     | 1  | 2.0     | 2.03    | 0.74    | 0.392   |
| Surface*Substrate | 1  | 2.0     | 2.00    | 0.73    | 0.396   |
| Surface*Ink       | 1  | 12.3    | 12.27   | 4.50    | 0.038   |
| Surface*Grid      | 5  | 11.6    | 2.33    | 0.85    | 0.519   |
| Blade*Substrate   | 1  | 44.1    | 44.05   | 16.14   | 0.000   |
| Blade*Ink         | 1  | 70.1    | 70.12   | 25.69   | 0.000   |
| Blade*Grid        | 5  | 66.3    | 13.26   | 4.86    | 0.001   |
| Substrate*Ink     | 1  | 64.1    | 64.08   | 23.48   | 0.000   |
| Substrate*Grid    | 5  | 32.2    | 6.45    | 2.36    | 0.051   |
| Ink*Grid          | 5  | 477.2   | 95.44   | 34.97   | 0.000   |
| Error             | 60 | 163.8   | 2.73    |         |         |
| Total             | 95 | 22822.5 |         |         |         |

The ANOVA results in Table S-4, indicate that the surface, blade, substrate, ink and grid factors all have a significant impact on line width, as the p-value is less than 0.005 for these factors. Additionally, the surface does have some impact on ink with respect to line width as shown in this p value. However, the surface does not have an impact on blade, ink or grid, as expected. There is significant interaction between the blade and the substrate, the ink, and the grid. This would indicate that the blade type effect and the effect on line width from the substrate, the ink, and the grid are interrelated. This is to be expected as the blade interaction with the blade is likely dependent on the chemical composition and properties (i.e. viscosity, mixing) of the ink likely affect interaction with the blade leading this this interaction in dependence. There is significant interaction between dependence of line width with substrate and ink with near-significant interrelation of dependence between the substrate and grid. This is to be expected as the ink interacts with the substrate differently based on the composition of the ink and the substrate, while the substrate can have some impact on the grid due to the substrate surface properties and chemical composition. Finally, the line width dependence on ink and grid are interrelated as the ink must have a relationship with grid. This is to be expected as the inks have much different viscosity, thereby affecting the grid line width that can be printed.
